# Supplementary material for: Strategies to Promote ResiliencY (SPRY): a randomised embedded multifactorial adaptative platform (REMAP) clinical trial protocol to study interventions to improve recovery after surgery in high-risk patients
Source: PubMed Central journal article supplement — BMJ Open. 2020 Sep 29;10(9):e037690. doi: 10.1136/bmjopen-2020-037690 (PMC7526307; doi:10.1136/bmjopen-2020-037690), 2020-09-29

# BMJ Open

BMJ Open is committed to open peer review. As part of this commitment we make the peer review history of every article we publish publicly available.

When an article is published we post the peer reviewers' comments and the authors' responses online. We also post the versions of the paper that were used during peer review. These are the versions that the peer review comments apply to.

The versions of the paper that follow are the versions that were submitted during the peer review process. They are not the versions of record or the final published versions. They should not be cited or distributed as the published version of this manuscript.

BMJ Open is an open access journal and the full, final, typeset and author-corrected version of record of the manuscript is available on our site with no access controls, subscription charges or pay-per-view fees (<http://bmjopen.bmj.com>).

If you have any questions on BMJ Open's open peer review process please email [info.bmjopen@bmj.com](mailto:info.bmjopen@bmj.com)

# BMJ Open

## Strategies to Promote Resiliency (SPRY): A Randomized Embedded Multifactorial Adaptative Platform (REMAP) Clinical Trial Protocol to Study Interventions to Improve Recovery after Surgery in High Risk Patients

|                               |                                                                                                                                                                                                                                                                                                                                                                                                                                                                                                                                                                                                                                                                                                                                                                                                                                                                                                                                                                                                                                                                                                                                                                                                                                                                  |
|-------------------------------|------------------------------------------------------------------------------------------------------------------------------------------------------------------------------------------------------------------------------------------------------------------------------------------------------------------------------------------------------------------------------------------------------------------------------------------------------------------------------------------------------------------------------------------------------------------------------------------------------------------------------------------------------------------------------------------------------------------------------------------------------------------------------------------------------------------------------------------------------------------------------------------------------------------------------------------------------------------------------------------------------------------------------------------------------------------------------------------------------------------------------------------------------------------------------------------------------------------------------------------------------------------|
| Journal:                      | <i>BMJ Open</i>                                                                                                                                                                                                                                                                                                                                                                                                                                                                                                                                                                                                                                                                                                                                                                                                                                                                                                                                                                                                                                                                                                                                                                                                                                                  |
| Manuscript ID                 | bmjopen-2020-037690                                                                                                                                                                                                                                                                                                                                                                                                                                                                                                                                                                                                                                                                                                                                                                                                                                                                                                                                                                                                                                                                                                                                                                                                                                              |
| Article Type:                 | Protocol                                                                                                                                                                                                                                                                                                                                                                                                                                                                                                                                                                                                                                                                                                                                                                                                                                                                                                                                                                                                                                                                                                                                                                                                                                                         |
| Date Submitted by the Author: | 17-Feb-2020                                                                                                                                                                                                                                                                                                                                                                                                                                                                                                                                                                                                                                                                                                                                                                                                                                                                                                                                                                                                                                                                                                                                                                                                                                                      |
| Complete List of Authors:     | Reitz, Katherine; University of Pittsburgh Department of Surgery<br>Seymour, Christopher W. ; UPMC, Department of Critical Care Medicine<br>Vates, Jennifer; UPMC, Department of Critical Care Medicine<br>Quintana , Melanie; Berry Consultants Statistical Innovation<br>Viele, Kert; Berry Consultants Statistical Innovation<br>Detry, Michelle; Berry Consultants Statistical Innovation<br>Morowitz, Michael ; Children's Hospital of Pittsburgh of UPMC<br>Morris, Alison; UPMC, Department of Medicine<br>Methe, Barbara; UPMC, Department of Medicine<br>Kennedy, Jason; UPMC, Department of Critical Care Medicine<br>Zuckerbraun, Brian; University of Pittsburgh Department of Surgery,<br>girard, Timothy; UPMC, Department of Critical Care Medicine<br>Marroquin, Oscar; UPMC Health System, Clinical Analytics<br>Esper, Stephen; University of Pittsburgh, Anesthesiology<br>Holder-Murray, Jennifer; University of Pittsburgh Department of Surgery<br>Newman, Anne; University of Pittsburgh Department of Epidemiology,<br>Department of Epidemiology<br>Berry, Scott; Berry Consultants Statistical Innovation<br>Angus, Derek; UPMC, Department of Critical Care Medicine<br>Neal, Matthew; University of Pittsburgh Department of Surgery |
| Keywords:                     | Adult surgery < SURGERY, Clinical trials < THERAPEUTICS, SURGERY                                                                                                                                                                                                                                                                                                                                                                                                                                                                                                                                                                                                                                                                                                                                                                                                                                                                                                                                                                                                                                                                                                                                                                                                 |
|                               |                                                                                                                                                                                                                                                                                                                                                                                                                                                                                                                                                                                                                                                                                                                                                                                                                                                                                                                                                                                                                                                                                                                                                                                                                                                                  |

SCHOLARONE™  
Manuscripts

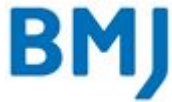

I, the Submitting Author has the right to grant and does grant on behalf of all authors of the Work (as defined in the below author licence), an exclusive licence and/or a non-exclusive licence for contributions from authors who are: i) UK Crown employees; ii) where BMJ has agreed a CC-BY licence shall apply, and/or iii) in accordance with the terms applicable for US Federal Government officers or employees acting as part of their official duties; on a worldwide, perpetual, irrevocable, royalty-free basis to BMJ Publishing Group Ltd ("BMJ") its licensees and where the relevant Journal is co-owned by BMJ to the co-owners of the Journal, to publish the Work in this journal and any other BMJ products and to exploit all rights, as set out in our [licence](#).

The Submitting Author accepts and understands that any supply made under these terms is made by BMJ to the Submitting Author unless you are acting as an employee on behalf of your employer or a postgraduate student of an affiliated institution which is paying any applicable article publishing charge ("APC") for Open Access articles. Where the Submitting Author wishes to make the Work available on an Open Access basis (and intends to pay the relevant APC), the terms of reuse of such Open Access shall be governed by a Creative Commons licence – details of these licences and which [Creative Commons](#) licence will apply to this Work are set out in our licence referred to above.

Other than as permitted in any relevant BMJ Author's Self Archiving Policies, I confirm this Work has not been accepted for publication elsewhere, is not being considered for publication elsewhere and does not duplicate material already published. I confirm all authors consent to publication of this Work and authorise the granting of this licence.

# Strategies to Promote Resiliency (SPRY): A Randomized Embedded Multifactorial Adaptative Platform (REMAP) Clinical Trial Protocol to Study Interventions to Improve Recovery after Surgery in High Risk Patients

Katherine M Reitz MD<sup>1,2</sup>, Christopher W Seymour MD, MSc<sup>2,3,4</sup>, Jennifer R Vates MS-RA<sup>2,3</sup>, Melanie Quintana PhD<sup>5</sup>, Kert Viele PhD<sup>5</sup>, Michelle Detry PhD<sup>5</sup>, Michael J Morowitz MD<sup>1,6,7</sup>, Alison Morris MD, MS<sup>7,8</sup>, Barbara Methe PhD<sup>7,8</sup>, Jason Kennedy MS<sup>2,3</sup>, Brian S Zuckerbraun MD<sup>1</sup>, Timothy D Girard MD, MSCI<sup>2,3</sup>, Oscar C Marroquin MD<sup>9</sup>, Stephen A Esper MD, MBA<sup>10</sup>, Jennifer Holder-Murray MD<sup>1</sup>, Anne B Newman MD, MPH<sup>11</sup>, Scott Berry PhD<sup>5</sup>, Derek C Angus MD, MPH, FRCP<sup>2,3</sup>, Matthew D Neal MD<sup>1,3</sup>

1. Department of Surgery, University of Pittsburgh School of Medicine, Pittsburgh, PA
2. Clinical Research, Investigation and Systems Modeling of Acute Illness (CRISMA) Center, Pittsburgh, PA
3. Department of Critical Care Medicine, University of Pittsburgh School of Medicine, Pittsburgh, PA
4. Department of Emergency Medicine, University of Pittsburgh School of Medicine, Pittsburgh, PA
5. Berry Consultants - Statistical Innovation, Austin, TX
6. Pediatric General and Thoracic Surgery, UPMC Children's Hospital of Pittsburgh, Pittsburgh, PA
7. Center for Medicine and the Microbiome, University of Pittsburgh School of Medicine, Pittsburgh, PA
8. Department of Medicine, University of Pittsburgh School of Medicine, Pittsburgh, PA
9. Clinical Analytics, UPMC Health Services Division, Pittsburgh, PA
10. Department of Anesthesiology and Perioperative Medicine, University of Pittsburgh School of Medicine, Pittsburgh, PA
11. Department of Epidemiology, University of Pittsburgh, Graduate School of Public Health, Pittsburgh, PA

**Word Count** 3,474

**Figures** 4

**Tables** 3

## Current address and affiliation of corresponding author

Katherine M Reitz, MD  
Postdoctoral Scholar, Department of Surgery  
200 Lothrop St, F677 Presbyterian Hospital  
Pittsburgh, PA 15213  
Phone: (585) 802-1116, Fax: (412) 647-1448  
Email: [reitzkm2@upmc.edu](mailto:reitzkm2@upmc.edu)

## SPRY-Metformin Protocol

## Abstract

**Introduction:** As the population ages, there is interest in strategies to promote resiliency, especially for frail patients at risk of its complications. The physiologic stress of surgery in high risk individuals has been proposed both as an important cause of accelerated age-related decline in health and as a model testing the effectiveness of strategies to improve resiliency to age-related health decline. We describe a randomized, embedded, multifactorial, adaptative platform (REMAP) trial to investigate multiple perioperative interventions, the first of which is metformin and selected for its anti-inflammatory and anti-aging properties beyond its traditional blood glucose control features.

**Methods and analysis:** Within a multi-hospital, single healthcare system, the Core Protocol for Strategies to Promote Resiliency (SPRY) will be embedded within both the electronic health record (EHR) and healthcare culture generating a continuously self-learning healthcare system. Embedding reduces the administrative burden of a traditional trial while accessing and rapidly analyzing routine patientcare EHR data. SPRY-Metformin is a placebo-controlled trial, and the first SPRY domain evaluating the effectiveness of 3 metformin dosages across 3 preoperative durations within a heterogeneous set of major surgical procedures. The primary outcome is 90-day hospital free days. Bayesian posterior probabilities guide interim decision making with predefined rules to determine stopping for futility or superior dosing selection. Using response adaptative randomization, a maximum of 2,500 patients allows 77% to 92% power, detecting >15% primary outcome improvement. Secondary outcomes include mortality, readmission, and postoperative complications. A subset of patients will be selected for substudies evaluating the microbiome, cognition, postoperative delirium, and strength.

## SPRY-Metformin Protocol

**Ethics and dissemination:** The Core Protocol of SPRY REMAP and associated SPRY-Metformin Domain-specific Appendix have been ethically approved by the Institutional Review Board and are publicly registered. Results will be publicly available to healthcare providers, patients, and trial participants following achieving predetermined platform conclusions.

**ClinicalTrials.gov:** NCT03861767

**Word Count:** 298/300

For peer review only

## Article Summary

### Article focus

- A randomized, embedded, multifactorial, adaptative platform (REMAP) trial efficiently evaluating the effectiveness of perioperative therapies in aged, frail patients (Strategies to Promote Resiliency [SPRY]) for which the physiologic stress of surgery is a cause of physiologic age-acceleration and can result in significant morbidity and mortality.
- Metformin has pleiotropic anti-inflammatory properties potentially slowing the process of aging and improve perioperative outcomes in non-diabetics and will be the first domain to be tested on the SPRY Core Protocol (SPRY-Metformin).

### Key message

- The electronic health record embedded SPRY-Application, synchronizes trial activities into standard of perioperative care, minimizes both the administrative burden and costs associated and allows for rapid Bayesian adaptative analysis minimizing harm to enrolled and future patients and establishing an effective treatment strategy.

### Strengths and Limitations

- Trial protocol embedded within the electronic health record using a REMAP design with concurrent biorepository (i.e., blood and stool) sample collection.
- Outcome information may be limited or incomplete in patients who receive postoperative care within the multi-hospital healthcare system.

## Keywords

Randomized embedded multifactorial adaptive platform, REMAP, metformin, 90-day hospital free days, perioperative optimization, aging, prehabilitation

For peer review only



## Introduction

By 2020, over 55,000 Americans will be greater than 65 years of age [1]. The lifelong accumulation of stressors progressively leads to chronic disease and disability compromising homeostatic reserve. These health deficits, defined as frailty, leave individuals vulnerable to a physiologic insult further reducing resiliency [2]. In response, a broad range of multimodal therapies (e.g., smoking cessation, nutritional optimization, physical activity programs, etc.) are currently under investigation to both prevent and reduce the effects of aging [3]. However, as frailty is developed longitudinally, establishing treatment efficacy in clinical trials requires years to decades of outcome monitoring [4].

A lifetime of exposure to multiple, small stressors may cumulatively reduce reserve equal to that of few, severe stressors [5]. Elderly patients undergo over one third of all surgical interventions and have an increased rate of postoperative morbidity and mortality [5–8]. According to the National Institute for Aging, the severe stress of a surgery is an “age-accelerating” cause of frailty [5], rapidly depleting resilience to secondary insults [9,10]. Therefore, a major surgical intervention is an efficient experimental model for evaluating novel strategies aimed at stabilizing, preventing, or reversing frailty [5].

Perioperative investigations strive to improve outcomes in an aged and at-risk population and also model accelerated aging. We have therefore designed a randomized, embedded, multifactorial, adaptative platform (REMAP) [11] trial to evaluate the effectiveness of perioperative therapies within a multi-hospital single healthcare system: Strategies to Promote Resiliency (SPRY). Metformin, the most commonly prescribed non-insulin medication for those with diabetes [12–14], has pleiotropic anti-inflammatory properties, and potentially slows the process of aging [15,16]. Therefore, we report the first of many trial protocols evaluating perioperative therapies on this adaptive platform, SPRY-Metformin, randomizing patients to 3 dosages of metformin or placebo in parallel.

SPRY-Metformin Protocol

## Methods and Analysis

### **Aims**

The primary aim of SPRY is to establish the Core Protocol infrastructure for continuous and simultaneous adaptive analysis of multifactorial perioperative therapies evaluating their effect on resiliency to age-accelerating surgical stress in patients at risk for postoperative morbidity and mortality.

The primary aim of the SPRY-Metformin domain is to establish the ideal duration and dose of perioperative metformin to determine its effectiveness as pharmacologic optimization across multiple surgical specialties.

Unified, the aims of the Core Protocol and all associated multifactorial Domain-specific Appendixes are to embed the study protocols both digitally within the electronic health record (EHR) and culturally among clinicians generating an efficient, cost-effective, patient centered and continuously self-learning healthcare system.

### **Trial Design**

The design of the SPRY Core Protocol and associated Domain-Specific Appendixes align with the recommendations of the Adaptive Platform Trials Coalition [17] and SPIRIT guidelines [18]. Specifically, SPRY will perpetually assess multiple treatments in multiple surgical and disease subtypes using response adaptive randomization and a comprehensive statistical analysis plan to create a self-learning health system. The protocol underwent prelaunch regulatory, scientific, and ethical review and all results will be reported based upon the trigger of formal stopping rules.

### **Patient and Public Involvement**

No patient involvement.

## SPRY-Metformin Protocol

### *SPRY Core Protocol*

SPRY is the first Core Protocol outlining the embedding of a trial within the EHR and routine perioperative healthcare delivery for at-risk, aged adults. The Core Protocol creates standardized trial elements shared by all applied trials or domains preventing the continuous development and then dismantling of the expensive and complex clinical trial infrastructure [19]. As with other adaptive platform trials, SPRY assesses multiple interventions simultaneously using Bayesian statistical analysis and response adaptive randomization evaluating the treatment effect in predefined surgical specialties (e.g., vascular, orthopedics, spine, hepatobiliary, etc.) or strata [20,21]. In the REMAP design, patients can be randomized to one of many treatments within one of many domains resulting in multiple possible experimental treatment combinations. The Core Protocol allows for aggregation of the treatment response across different domains and the multifactorial evaluation of synergistic or antagonistic combinations within each of the strata.

SPRY trial flow per the Consolidation Standard of Reporting Trials (CONSORT) guidelines are adapted from the traditional linear format into a concentric diagram, demonstrating the perpetual nature of the Core Protocol (**Figure 1A**).

### *SPRY-Metformin Domain-Specific Appendix*

SPRY-Metformin is a multi-hospital, single healthcare system, placebo-controlled, adaptive, phase 3 clinical trial that is blinded at the level of the patient, clinician, research team, and data analyst. SPRY-Metformin is the first domain to be launched on the SPRY Core Protocol testing the effectiveness of metformin in improving perioperative outcomes (**Figure 1B**). Patients are screened and recruited through a custom EHR embedded application (**Figure 2**). Enrollment, consent, and study drug dose randomization occur within standard of care preoperative surgical and anesthesia clinic appointments at contact point 1. In the following 7 to 180 days, patients

## SPRY-Metformin Protocol

are pragmatically assigned to 1 of 3 preoperative study drug durations (short, intermediate, or long) based upon the scheduled date of their elective, major surgical intervention. Patients undergo an operation (contact point 3) and study drug is continued throughout the perioperative period through postoperative day (POD) 90 (**Figure 3**). All patients are prospectively monitored through POD 365 through both the automated collection of EHR data and longitudinal patient follow up (contact point 2, 5, 6).

### ***Trial Embedding***

The integration of this trial into the EHR and clinical workflow requires two distinct forms of embedding: digital and cultural.

#### *Digital Embedding*

We developed Java-based (Oracle Corporation, Redwood Shores, CA) custom software, the SPRY-Application, which interfaces with the research team and EHR. The digital embedding of the SPRY-Application serves multiple purposes. First, protecting the privacy of trial patients. Second, automating patient screening, enrollment, and randomization while synchronizing research activities within perioperative standard of care clinical encounters. Third, accessing the robust EHR data generated as a part of routine patient care.

At UPMC, a two-factor authentication system safeguards all private patient information accessed through a single Citrix Workspace (Fort Lauderdale, FL) in accordance with Health Insurance Portability and Accountability Act. Like all protected data and programs within the healthcare system, the SPRY-Application resides behind this institutional firewall. Here, the SPRY-Application is distinct from, but communicates with the inpatient (CERNER Co., Kansas City, MO) and outpatient (Epic Systems Co., Madison, WI) EHR, subject to the security measures protecting UPMC patient privacy.

## SPRY-Metformin Protocol

1  
2  
3 The SPRY-Application screens each patient with a scheduled appointment at enrolling  
4 preoperative SPRY-Metformin clinics (**Figure 3**). The EHR of each scheduled patient is  
5 reviewed, generating a list of patients meeting a subset of inclusion and exclusion criteria. This  
6 list of potential SPRY-Metformin candidates is then automatically distributed to the clinicians via  
7 institutional email.  
8  
9  
10  
11  
12

13  
14 In preoperative clinics, patients are offered the opportunity to participate in SPRY-  
15 Metformin. The SPRY-Application guides the surgeons and anesthesiologists through the  
16 stepwise informed consent process. Then, EHR data auto-populate patient specific screening  
17 information within the SPRY-Application, which are then reviewed and confirmed with the  
18 patient. Any discrepancies between patient report and the EHR auto-populated SPRY-  
19 Application data prompt the clinician to update the EHR (**Figure 1A**). This both minimizes trial  
20 data entry and maintains the accuracy of clinical information.  
21  
22  
23  
24  
25  
26  
27

28  
29 Patients meeting all inclusion and no exclusion criteria are randomized based upon the  
30 SPRY-Application algorithms accounting for the preoperative duration, enrolling site, age (e.g.,  
31 <75 or  $\geq 75$ ), and surgical strata. Automatically, the SPRY-Application then generates the study  
32 drug and laboratory prescription and synchronizes all research activities (e.g., blood and stool  
33 samples) within pertinent perioperative standard of care clinical encounters. The SPRY-  
34 Application monitors for Cerner Admission-Discharge-Transfer alerts and informs the research  
35 team of hospital admissions and discharges for enrolled patients. Inevitable in-trial schedule  
36 changes can be manually updated within the SPRY-Application adjusting the research activity  
37 timeline, updating research personnel, and distributing additional study drug, as needed, via the  
38 mail.  
39  
40  
41  
42  
43  
44  
45  
46  
47  
48

49  
50 Predefined clinical care information recorded within the EHR is abstracted by the SPRY-  
51 App via SQL Server. Like the SPRY-Application and EHR, these data are stored behind the  
52 UPMC firewall and managed by Biostatistical and Data Management Core in the Department of  
53 Critical Care Medicine at UPMC.  
54  
55  
56  
57  
58  
59  
60

## SPRY-Metformin Protocol

### *Cultural Embedding*

SPRY-Metformin is designed with the intent to rely heavily on bedside clinicians for many aspects of trial execution. Healthcare system staff within high volume surgical clinics are busy with existing patient care responsibilities. We have attempted to minimize the burden of research in two ways. First, whenever possible, the protocol is fused within existing care activities. Second, we focus on engaging, educating, and motivating the entire clinical team.

For example, as each new site is identified, prior to site initiation, the research team informs the clinical team about the potential benefits of a REMAP trial design and a self-learning healthcare system. Simultaneously, the clinical team educates the research team on their patients' experiences and the clinic or unit specific workflow. Both teams then work together to generate both clinic or unit specific protocols and SPRY-Application user manuals.

Embedding minimizes the time required by each individual clinician and researcher by distributing the research effort across many capable hands, guided by the SPRY-Application.

### **Study Population**

The evaluation of enrollment criteria for the study population occurs across two formats and at two levels. Initially, a subset of criteria is screened digitally by the SPRY-Application.

Subsequently, in clinic the consenting clinician confirms all inclusion and exclusion criteria. As prompted by the SPRY-Application, any discrepancies found between the data within the SPRY-Application and the patients' reported health state are manually updated within the SPRY-Application and EHR (**Figure 4**).

At the first level, participants must meet all SPRY inclusion and no exclusion criteria. At the second level, participants are evaluated against the inclusion and exclusion criteria of the SPRY-Metformin domain (**Table 1**). Patients randomized in SPRY-Metformin can also

## SPRY-Metformin Protocol

participate in either or both substudies (microbiome or motor) as well as additional future domains on the SPRY Core Protocol.

### ***SPRY-Metformin Intervention***

#### *Metformin Rationale*

We hypothesize that pharmacologic perioperative optimization will improve surgical outcomes for an aged, frail patient population. Metformin, the most commonly prescribed non-insulin medication for type 2 diabetics, is one such therapy [12–14]. In multiple studies, metformin consistently delays the aging process and minimizes deleterious cellular inflammation [4] through effects on cellular respiration [22], muscle function [23], and the microbiome [24]. Metformin advantageously modulates the body's response to physical stress through its systemic anti-inflammatory properties [25,26]. These biologic mechanisms and pleiotropic effects appear to be independent of blood glucose control [26].

Metformin has an excellent safety profile and is well tolerated [12–14]. Traditionally in diabetics, metformin is discontinued throughout the perioperative period because of both potential hypoglycemia and the theoretical risk of metabolic induced lactic acidosis. As monotherapy, metformin is not expected to cause hypoglycemia [13]. Multiple cohort studies and meta-analysis have demonstrated the risk of metabolic acidosis to diabetics is not higher in those prescribed metformin [27]. Therefore, there is no expected risk of metformin induced lactic acidosis in those with adequate screening renal and hepatic function [27,28]. Therefore, perioperative metformin is the first optimization strategy to be tested on the SPRY Core Protocol.

#### *Study Drug*

Both the duration and dose of study drug exposure will be evaluated. Patients are stratified based upon the anticipated perioperative duration: short (7-28 days), intermediate (29-90 days),

## SPRY-Metformin Protocol

1  
2  
3 or long (91-180 days). Within each duration window, patients are randomized to 1 of 3 doses of  
4 metformin extended release 500, 1000, or 1500mg, or placebo. Patients allocated to the  
5 1500mg arm are prescribed 2 500mg tablets for 7 days before ramping up to the full 3 tablet  
6 dose [29]. In the placebo arm, the same ramp up procedure and multiple dosages are used  
7 maintaining the blinded nature of this study.  
8  
9  
10  
11  
12

13  
14 Study drug is initiated the day following randomization and continued through  
15 postoperative day 90 without planned interruption perioperatively. Patients compliance is  
16 queried at follow up patient encounters (**Table 3, Figure 2**).  
17  
18  
19  
20  
21

### *EHR Embedded Safety Alerts*

22  
23 Surgical stress can cause fluctuation in organ function perioperatively. As a part of routine  
24 clinical care, patients at the greatest risk of physiologic derailment and significant postoperative  
25 complications in the postoperative period are admitted for monitoring. Therefore, the SPRY-  
26 Application monitors the results of postoperative renal and hepatic testing completed as a part  
27 of routine postoperative care. Both evidence of current (i.e., estimated glomerular filtration rate  
28 <45 or serum lactate  $\geq 4$ ) or potential future (i.e., ordered contrasted imaging studies) organ  
29 dysfunction generate “pop-up” style CERNER EHR alerts prompting the bedside nurse to hold  
30 study drug administration (**Figure 2**). Simultaneously, an institutional email notifies the research  
31 team facilitating clinical to research physician consultation.  
32  
33  
34  
35  
36  
37  
38  
39  
40  
41  
42  
43  
44  
45

### **Endpoints**

46  
47 The primary endpoint of SPRY Core Protocol is the number of hospital free days (HFD) up to 90  
48 days [30–33]. This composite endpoint is an ordered categorical variable defined as the number  
49 of days from the day of surgery to the 90 thereafter, during which the patient is alive and free of  
50 hospitalization. If a patient is discharged and readmitted, then this hospital exposure is added to  
51  
52  
53  
54  
55  
56  
57  
58  
59  
60



## SPRY-Metformin Protocol

1  
2  
3 the duration of the primary admission. Hospitalizations within the healthcare system are  
4 monitored and recorded by the EHR embedded SPRY-Application. Out of system  
5 hospitalizations are reviewed at each postoperative point of contact (2, 5, 6; **Figure 3**).  
6  
7 Emergency department and unplanned outpatient evaluations without admissions are not  
8 included in this composite. Any person who dies within this 90-day period is assigned -1 HFD,  
9 even if there is a period during which the patient is not within the hospital. Thus, mortality is  
10 specifically captured and this endpoint reflects the recovery for high-risk patients following a  
11 major surgical intervention.  
12  
13  
14  
15  
16  
17  
18

19  
20 The predefined and validated secondary clinical endpoints are listed in **Table 2** and  
21 **Table 3** [34–37]. All within healthcare system outcomes (i.e., intensive care admission and  
22 duration; organ failure free days; in-hospital mortality; hospital discharge location; and  
23 reoperation and readmission rates) are automatically abstracted from the EHR. Other outcomes  
24 (i.e., surgical site infection [35] and occurrence [36], deep vein thrombosis and pulmonary  
25 embolism rates) are manually abstracted from the EHR. Out of healthcare system outcome in  
26 addition to quality of life [38], cognitive [39–41], delirium [42], functional testing [39,43], and  
27 employment status are monitored prospectively with further physiologic testing [44,45] for those  
28 in the motor substudy (**Table 3, Figure 3**).  
29  
30  
31  
32  
33  
34  
35  
36  
37  
38  
39  
40

### *Biorepository*

41  
42 An additional long-term goal of SPRY-Metformin is to understand the molecular mechanisms by  
43 which metformin might attenuate the inflammatory response and improve outcomes after  
44 surgical stress. In order to provide a library for future biological testing and sampling, SPRY-  
45 Metformin is creating a biorepository including a maximum of 5 blood samples (contact points 1,  
46 3 [POD 0-3], and 4) throughout the trial (**Figure 3**). Patients discharged prior to POD 3 will have  
47 the fourth blood sample collected only if a venous blood sample is clinically indicated on the day  
48 of discharge. The biorepository includes the collection of peripheral blood mononuclear cells,  
49  
50  
51  
52  
53  
54  
55  
56  
57  
58  
59  
60

## SPRY-Metformin Protocol

1  
2  
3 plasma, and planned collections for DNA, RNA, and metabolomic analysis. Substudy patients  
4 will provide additional biorepository samples: microbiome (stool samples contact point 2, 3  
5 [intraoperative rectal swab], 4, and 5) and muscle biopsy (contact point 3 [intraoperative] and  
6 contact point 6). Microbiome samples will be captured and preserved with the Zymo DNA/RNA  
7 Fecal Collection Kit (Zymo Research, Irvine, CA).  
8  
9  
10  
11  
12

### **Statistical Analysis**

13  
14  
15  
16  
17 Complete documentation of the statistical analysis plan is including as supplemental materials.  
18  
19  
20  
21

### *Simulations and Sample Size Generation*

22  
23  
24 In collaboration with Berry Consultants, LLC trial simulations quantified operating characteristics  
25 of the SPRY-Metformin trial. Utilizing retrospective UPMC EHR data, virtual patient datasets  
26 were created based on the observed distributions of the primary endpoint within each stratum.  
27  
28 Patients randomized to placebo were simulated according to the observed HFD distributions  
29 conditional on the assumed surgical strata of the patient. Patients randomized to active  
30 treatment were simulated assuming a common percent increase in HFD days across all strata  
31 between 0% (null) and 15% (alternative) for the highest dose of the treatment. Under each  
32 treatment effect assumption, many trials were simulated and virtually executed, including all  
33 interim analyses and adaptations. Trial behavior, such as power and type I error were  
34 summarized as the proportion of simulated trials that were successful under the alternative and  
35 null scenarios respectively.  
36  
37  
38  
39  
40  
41  
42  
43  
44  
45  
46

47 Patients will be adaptively randomized to placebo or 3 doses of metformin, the trial has  
48 at least 84% power to detect a treatment effect of at least a 15% reduction in mean hospital  
49 days for a minimum of 1 of the doses under the assumption that the dose is equally effective  
50 across all 3 preoperative metformin durations. If a dose is not effective for the short preoperative  
51  
52  
53  
54  
55  
56  
57  
58  
59  
60

## SPRY-Metformin Protocol

duration, the trial has at least 77% power to detect a treatment effect of at least a 15% reduction in mean hospital days for at least 1 of the doses.

The motor subgroup will enroll up to one third of SPRY-Metformin trial patients. The microbiome and muscle biopsy subgroups are exploratory pilot substudies with 1,000 and 200 patients to be enrolled respectively.

### *Response Adaptive Randomization and Interim Analysis*

Initially, SPRY-Metformin will randomize a maximum of 2,000 patients. Within each of the 3 preoperative durations, patients will initially be randomized  $\sqrt{3}$ :1:1:1 to placebo and the 3 doses of metformin. Interim analysis is completed each time 500 patients have been randomized across all preoperative durations and followed for 90 POD. At each interim analysis, the trial can be stopped early for demonstrating efficacy on any one of the metformin doses compared to placebo. If the trial has not stopped for success, the response adaptive randomization will preferentially randomize to the best performing metformin doses within each preoperative duration while maintaining the allocation to placebo. If there is a low posterior probability of efficacy (odds ratio,  $OR \leq 0.8$ ), single or multiple doses can be dropped for futility. If all doses have been dropped within a preoperative duration, enrollment to that preoperative duration will be stopped. Finally, the maximum sample size will be increased from 2,000 to 2,500 if at least one dose within one preoperative duration has  $\geq 50\%$  posterior probability of efficacy ( $OR \leq 0.8$ ).

The interim analyses and all resulting actions including updates to randomization probabilities are pre-specified and not subject to recommendations from the Data Safety and Monitoring Boards (DSMB). However, the DSMB may make recommendations regarding safety, trial conduct, or ongoing scientific validity, integrity, and both clinical and scientific relevance of the study.

## SPRY-Metformin Protocol

### *Analysis Plan*

The primary analysis method of 90-day HFD within SPRY-Metformin is a Bayesian ordinal logistic regression model that accounts for differences in the expected 90-day HFD distribution depending on surgical strata. Within this model, the effect of each dose of metformin for each preoperative duration relative to placebo is characterized as a constant log-OR shift in the 90-day HFD distribution. The primary intention to treat analysis will include those who have been randomized. All missing data will be imputed based upon the median observed 90-day HFD value for each treatment arm and preoperative duration. Sensitivity analysis may explore a per protocol analysis and alternative imputation strategies.

Superiority of a metformin dose to placebo within SPRY-Metformin is determined based on the posterior probability that the pooled log-OR effect of that dose across all enrolling preoperative durations relative to placebo is less than 0, indicating a shift in the 90-day HFD distribution towards more HFD under treatment compared to placebo. Success is declared at an interim or at the final analysis if the posterior probability of superiority for any dose of metformin is greater than the pre-defined interim-specific success threshold. The thresholds are based on an O'Brien Fleming spending function assuming a maximum sample size of 2,500 [46].

SPRY-Metformin secondary outcomes will be analyzed using regression models that account for expected differences in surgical strata of the patient (**Table 2, 3**).

Additional domains and additional interventions within domains will be added to the SPRY Core Protocol. Treatment effects can be added for each additional perioperative therapy, as well as treatment-by-subgroup interactions to evaluate the heterogeneity of treatment effects between the existing SPRY-Metformin and future domains.

## Ethics and Dissemination

## SPRY-Metformin Protocol

Both the Core Protocol and SPRY-Metformin Domain-specific Appendix were independently approved at the University of Pittsburgh Institutional Review Board (IRB# 18060039, 18060038) without a required Investigational New Drug exemption from the Food and Drug Administration. Three independent groups were established to provide oversight for SPRY-Metformin: Trial Steering Committee (TSC), Statistical Monitoring Committee (SMC), and DSMB. The blinded TSC oversees the overall trial conduct and makes recommendations regarding all trial-related decisions. The unblinded statisticians of the SMC are responsible for conducting and monitoring the interim analyses reporting patient enrollment, patient status, and a summary of trial adaptations based upon the pre-specified protocol.

The DSMB reviews patient safety and protocol compliance reports generated by the SMC [47] and makes trial conduct recommendations to the TSC (**Figure 4**).

### *Platform conclusion*

In SPRY, a platform conclusion describes when a statistical trigger has been reached and, following evaluation by the DSMB and in conjunction with the TSC, a decision is made to conclude a domain or intervention within a domain for superiority, equivalence, or futility. Under all circumstances, a platform conclusion leads to implementation of the result within the REMAP and under almost all circumstances a platform conclusion leads immediately to Public Disclosure of the result by presentation and publication by the SPRY research team.

## References

- 1 2017 National Population Projections Table. United States Census Bur. 2017.
- 2 Walston J, Hadley EC, Ferrucci L et al. Research agenda for frailty in older adults:  
3 toward a better understanding of physiology and etiology: summary from the American  
4 Geriatrics Society/National Institute on Aging Research Conference on Frailty in Older  
5 Adults. *J Am Geriatr Soc* 2006;**54**:991. doi:10.1111/j.1532-5415.2006.00745.x
- 6 Fairhall N, Langron C, Sherrington C, et al. Treating frailty-a practical guide. *BMC Med*  
7 2011;**9**:83. doi:10.1186/1741-7015-9-83
- 8 Barzilai N, Crandall JP, Kritchevsky SB, et al. Metformin as a Tool to Target Aging. *Cell*  
9 *Metab.* 2016;**23**:1060–5. doi:10.1016/j.cmet.2016.05.011
- 10 Robinson T, Walston J, Brummer N, et al. Frailty for Surgeons: Review of a National  
11 Institute on Aging Conference on Frailty for Specialists Thomas. *J Am Coll Surg*  
12 2015;**221**:1083–92. doi:10.1016/j.jamcollsurg.2015.08.428.Frailty
- 13 The Department of Health and Human Services: Administration on Aging (AoA). Profile of  
14 Older Americans: 2015 Profile. Washington, DC: 2016.  
15 [https://www.giaging.org/documents/A\\_Profile\\_of\\_Older\\_Americans\\_\\_2016.pdf](https://www.giaging.org/documents/A_Profile_of_Older_Americans__2016.pdf)
- 16 Eaton MP, Osler TM, Li Y, et al. Hospital Readmission After Noncardiac Surgery. *JAMA*  
17 *Surg* 2014;**149**:439. doi:10.1001/jamasurg.2014.4
- 18 Hall DE, Arya S, Schmid KK, et al. Association of a frailty screening initiative with  
19 postoperative survival at 30, 180, and 365 days. *JAMA Surg* 2017;**152**:233–40.  
20 doi:10.1001/jamasurg.2016.4219
- 21 Neupane I, Arora RC, Rudolph JL. Cardiac surgery as a stressor and the response of the  
22 vulnerable older adult. *Exp Gerontol* 2017;**87**:168–74. doi:10.1016/j.exger.2016.04.019
- 23 Joseph B, Zangbar B, Pandit V, et al. Emergency General Surgery in the Elderly: Too Old  
24 or Too Frail? *J Am Coll Surg* 2016;**222**:805–13. doi:10.1016/j.jamcollsurg.2016.01.063

## SPRY-Metformin Protocol

- 1  
2  
3 11 Angus DC. Fusing Randomized Trials With Big Data The Key to Self-learning Health  
4 Care Systems? *JAMA* 2019;**314**.  
5  
6  
7 12 Flory J, Lipska K. Metformin in 2019. *JAMA* 2019;**321**:1926–7.  
8  
9 doi:10.1001/jama.2019.3805  
10  
11 13 Madsen KS, Kähler P, Kähler LKA, *et al*. Metformin and second-or third-generation  
12 sulphonylurea combination therapy for adults with type 2 diabetes mellitus. *Cochrane*  
13 *Database Syst Rev* 2019;**2019**. doi:10.1002/14651858.CD012368.pub2  
14  
15  
16 14 Standard of Medical Care in Diabetes - 2019. 2019.  
17  
18  
19 15 Konopka AR, Miller BF. Taming expectations of metformin as a treatment to extend  
20 healthspan. *GeroScience* 2019;**41**:101–8. doi:10.1007/s11357-019-00057-3  
21  
22  
23 16 Hadley EC, Kuchel GA, Newman AB. Report: NIA Workshop on Measures of Physiologic  
24 Resiliencies in Human Aging. *Journals Gerontol - Ser A Biol Sci Med Sci* 2017;**72**:980–  
25 90. doi:10.1093/gerona/glx015  
26  
27  
28  
29 17 The Adaptive Platform Trials Coalition. Adaptive platform trials: definition, design, conduct  
30 and reporting considerations. *Nat Rev Drug Discov* 2019.  
31  
32  
33 18 Chan A, Tetzlaff JM, Altman DG. SPIRIT 2013 Statement: Defining Standard Protocol  
34 Items for Clinical Trials. *Ann Intern Med* 2016;**158**:200–7. doi:10.7326/0003-4819-158-3-  
35 201302050-00583.Requests  
36  
37  
38  
39 19 Schultz A, Marsh JA, Saville BR, *et al*. Trial refresh: A case for an adaptive platform trial  
40 for pulmonary exacerbations of cystic fibrosis. *Front Pharmacol* 2019;**10**:1–8.  
41  
42  
43  
44  
45  
46  
47  
48 20 Woodcock J, LaVange L. Master Protocols to Study Multiple Therapies, Multiple  
49 Diseases, or Both. *N Engl J Med* 2017;**377**. doi:10.1056/NEJMra1510062  
50  
51  
52 21 Berry SM, Berry DA. Accounting for multiplicities in assessing drug safety: A three-level  
53 hierarchical mixture model. *Biometrics* 2004;**60**:418–26. doi:10.1111/j.0006-  
54 341X.2004.00186.x  
55  
56  
57  
58  
59  
60

## SPRY-Metformin Protocol

- 1  
2  
3 22 Hou X, Song J, Li XN, *et al.* Metformin reduces intracellular reactive oxygen species  
4 levels by upregulating expression of the antioxidant thioredoxin via the AMPK-FOXO3  
5 pathway. *Biochem Biophys Res Commun* 2010;**396**:199–205.  
6  
7 doi:10.1016/j.bbrc.2010.04.017  
8  
9  
10  
11 23 Turban S, Stretton C, Drouin O, *et al.* Defining the contribution of AMP-activated protein  
12 kinase (AMPK) and protein kinase C (PKC) in regulation of glucose uptake by metformin  
13 in skeletal muscle cells. *J Biol Chem* 2012;**287**:20088–99. doi:10.1074/jbc.M111.330746  
14  
15  
16  
17 24 Wu H, Esteve E, Tremaroli V, *et al.* Metformin alters the gut microbiome of individuals  
18 with treatment-naïve type 2 diabetes, contributing to the therapeutic effects of the drug.  
19  
20  
21  
22  
23  
24  
25 25 Campbell JM, Bellman SM, Stephenson MD, *et al.* Metformin reduces all-cause mortality  
26 and diseases of ageing independent of its effect on diabetes control: A systematic review  
27 and meta-analysis. *Ageing Res Rev* 2017;**40**:31–44. doi:10.1016/j.arr.2017.08.003  
28  
29  
30  
31 26 Cameron AR, Morrison VL, Levin D, *et al.* Anti-Inflammatory Effects of Metformin  
32 Irrespective of Diabetes Status. *Circ Res* 2016;**119**:652–65.  
33  
34  
35  
36  
37 27 Pasquel FJ, Klein R, Adigweme A, *et al.* Metformin-Associated Lactic Acidosis. *Am J Med*  
38  
39  
40  
41  
42 28 Peña Porta JM, Villafuerte Ledesma HM, Vicente de Vera Floristán C, *et al.* Incidence,  
43 factors related to presentation, course and mortality of metformin-associated lactic  
44 acidosis in the healthcare area of a tertiary hospital. *Nefrologia* 2019;**39**:35–43.  
45  
46  
47  
48  
49  
50 29 Goodwin PJ, Stambolic V, Lemieux J, *et al.* Evaluation of metformin in early breast  
51 cancer: a modification of the traditional paradigm for clinical testing of anti-cancer agents.  
52  
53  
54  
55  
56 30 Lewis RJ, Angus DC, Laterre PF, *et al.* Rationale and design of an adaptive phase 2b/3



## SPRY-Metformin Protocol

- 1  
2  
3 clinical trial of selepressin for adults in septic shock: Selepressin evaluation programme  
4 for sepsis-induced shock - Adaptive clinical trial. *Ann Am Thorac Soc* 2018;**15**:250–7.  
5  
6 doi:10.1513/AnnalsATS.201708-669SD  
7  
8  
9 31 Ritch CR, Cookson MS, Chang SS, *et al.* Impact of Complications and hospital-free days  
10 on health related quality of life 1 year after radical cystectomy. *J Urol* 2014;**192**:1360–4.  
11  
12 doi:10.1016/j.juro.2014.06.004  
13  
14  
15 32 Bateni SB, Gingrich AA, Stewart SL, *et al.* Hospital utilization and disposition among  
16 patients with malignant bowel obstruction: A population-based comparison of surgical to  
17 medical management 11 Medical and Health Sciences 1117 Public Health and Health  
18 Services. *BMC Cancer* 2018;**18**:1–10. doi:10.1186/s12885-018-5108-9  
19  
20  
21  
22  
23  
24 33 Young P, Hodgson C, Dulhunty J, *et al.* End points for Phase II trials in intensive care :  
25 recommendations from the Australian and New Zealand Clinical Trials Group consensus  
26 panel meeting. *Crit Care Resusc* 2012;**14**:211–5.  
27  
28  
29  
30  
31 34 Jammer I, Wickboldt N, Sander M, *et al.* Standards for definitions and use of outcome  
32 measures for clinical effectiveness research in perioperative medicine: European  
33 Perioperative Clinical Outcome (EPCO) definitions: A statement from the ESA-ESICM  
34 joint taskforce on perioperative outcome measur. *Eur. J. Anaesthesiol.* 2015;**32**:88–105.  
35  
36 doi:10.1097/EJA.000000000000118  
37  
38  
39  
40  
41 35 Nsqip ACS. ACS NSQIP Variables & Definitions - Chapter 4. *ACS NSQIP Oper Man*  
42 2018;:1–167.  
43  
44  
45 36 DeBord J, Novitsky Y, Fitzgibbons R, *et al.* SSI , SSO , SSE , SSOPI: the elusive  
46 language of complications in hernia surgery. *Hernia* 2018;**22**:737–8.  
47  
48  
49 37 Schneider EB, Gani F, Pawlik TM, *et al.* Understanding Variation in 30-Day Surgical  
50 Readmission in the Era of Accountable Care. *JAMA Surg* 2015;**150**:1042.  
51  
52 doi:10.1001/jamasurg.2015.2215  
53  
54  
55 38 Rabin R, de Charro F. EQ-5D: a measure of health status from the EuroQol Group. *Ann*

## SPRY-Metformin Protocol

- 1  
2  
3 *Med* 2001;**33**:337–43. doi:10.3109/07853890109002087  
4
- 5 39 Cognition assessment using the NIH Toolbox. Department of Medical Social Sciences  
6 2013. <https://www.ncbi.nlm.nih.gov/pmc/articles/PMC3662346/pdf/WNL204798.pdf>  
7 (accessed 14 Jun 2019).  
8  
9
- 10  
11 40 Wittich W, Phillips N, Nasreddine ZS, *et al*. Sensitivity and Specificity of the Montreal  
12 Cognitive Assessment Modified for Individuals who are Visually Impaired. 2019.  
13 doi:10.1177/0145482x1010400606  
14  
15
- 16 41 Burgess PW ST. Hayling and Brixton Tests Manual. *Thames Val Test Company, Bury St*  
17 *Edmunds, UK*. Published Online First: 1997.<http://discovery.ucl.ac.uk/5457/> (accessed  
18 14 Jun 2019).  
19  
20  
21  
22  
23
- 24 42 Marcantonio ER, Michaels M, Resnick NM. Diagnosing delirium by telephone. 1998.  
25 doi:10.1046/j.1525-1497.1998.00185.x  
26  
27
- 28 43 Pfeffer RI, Kurosaki TT, Harrah CH, *et al*. Measurement of functional activities in older  
29 adults in the community. *Journals Gerontol* 1982;**37**:323–9. doi:10.1093/geronj/37.3.323  
30  
31
- 32 44 Sasaki H, Kasagi F, Yamada M, *et al*. Grip Strength Predicts Cause-Specific Mortality in  
33 Middle-Aged and Elderly Persons. *Am J Med* 2007;**120**:337–42.  
34 doi:10.1016/j.amjmed.2006.04.018  
35  
36  
37  
38
- 39 45 Butland R, Pang J, Gross E, *et al*. Two-, six-, and 12-minute walking tests in respiratory  
40 disease. *Br Med J* 1982;**284**. doi:10.1136/bmj.284.6329.1607  
41  
42
- 43 46 O'Brien PC, Fleming TR. A multiple testing procedure for clinical trials. *Biometrics*  
44 1979;**35**:549–56.<http://www.ncbi.nlm.nih.gov/pubmed/497341> (accessed 19 Jul 2019).  
45  
46
- 47 47 Calis KA, Archdeacon P, Bain R, *et al*. Recommendations for data monitoring committees  
48 from the Clinical Trials Transformation Initiative. *Artic Clin TRIALS Clin Trials*  
49 2017;**14**:342–8. doi:10.1177/1740774517707743  
50  
51  
52  
53  
54  
55  
56  
57  
58  
59  
60

## Declarations

### Author Statement

KR, CS, JV, OM, SE, JH, SB, DA, and MN participated in the creation of the study concept, protocol implementation, and outcome selection. JV, CS, MQ, KV, OM, SB, DA, and MN developed the data for the power analysis, completed the simulations, and/or associated statistical analysis plan. CS, JV, MM, AM, BZ, TG, DA, and MN contributed to the development of the substudies and data repository. CS, JV, OS, DA, and MN oversaw the digital embedding of the SPRY-Application. KR and JV were the major contributors in writing of the manuscript. All authors read and approved the final manuscript.

### Data Statement Section

Technical appendix and simulations were completed by Berry Consultants, LLC and are available within appendix of this publication.

### Funding

This work was supported by the UPMC Immune Transplant and Therapy Center, grant number IPA2019#8. Phone: 1-888-4UPMC-ITTC. website:  
<https://ittc.upmc.com/>

### Conflicts of Interest

The authors declare that they have no conflicts of interest.

### Acknowledgements

## SPRY-Metformin Protocol

1  
2  
3 We would like to acknowledge the significant contribution of the patients, families,  
4 researchers, data management teams, clinical staff, and sponsors for their support in  
5 the development and implementation of this study. We acknowledge the UPMC  
6 Department of Surgery and their patients for participating in SPRY-Metformin and all  
7 future aspects of SPRY. We acknowledge the Clinical Analytics in the Health  
8 Services Division at UPMC for preparing this data set with the support of Biostatistics  
9 and Data Management Core at the CRISMA Center in the Department of Critical  
10 Care Medicine at the University of Pittsburgh. We acknowledge the entire SPRY  
11 team for their contributions to this work.  
12  
13  
14  
15  
16  
17  
18  
19  
20  
21  
22  
23  
24  
25  
26  
27  
28  
29  
30  
31  
32  
33  
34  
35  
36  
37  
38  
39  
40  
41  
42  
43  
44  
45  
46  
47  
48  
49  
50  
51  
52  
53  
54  
55  
56  
57  
58  
59  
60

## Tables

**Table 1. Core Protocol and SPRY-Metformin Domain-Specific Appendix Inclusion and Exclusion Criteria**

| <b>SPRY</b>                       |                                                                                                                                                   |
|-----------------------------------|---------------------------------------------------------------------------------------------------------------------------------------------------|
| <u>Inclusion Criteria</u>         |                                                                                                                                                   |
|                                   | Adult ( $\geq 18$ years of age)                                                                                                                   |
|                                   | Evaluation at any preoperative elective clinic within the healthcare system                                                                       |
|                                   | Planned surgical intervention $\geq 7$ and $<180$ days following the preoperative encounter                                                       |
| <u>Exclusion Criteria</u>         |                                                                                                                                                   |
|                                   | Clinician deems inclusion may be potentially harmful                                                                                              |
|                                   | Emergent surgical procedure                                                                                                                       |
|                                   | Patient has participated in SPRY within the proceeding 90 days                                                                                    |
| <b>SPRY-Metformin<sup>a</sup></b> |                                                                                                                                                   |
| <u>Inclusion Criteria</u>         |                                                                                                                                                   |
|                                   | Men and post-menopausal women who are $\geq 60$ years of age or are $<60$ years of age with a Charlson Comorbidity Index $>2$                     |
|                                   | Ability to swallow non-crushed pills                                                                                                              |
| <u>Exclusion Criteria</u>         |                                                                                                                                                   |
|                                   | Pre-existing type I or II diabetes mellitus                                                                                                       |
|                                   | Metformin use in the prior 6 months                                                                                                               |
|                                   | Known allergy to metformin                                                                                                                        |
|                                   | Acute or chronic metabolic acidosis with or without coma                                                                                          |
|                                   | History of lactic acidosis                                                                                                                        |
|                                   | History of excessive alcohol intake                                                                                                               |
|                                   | Severe hepatic dysfunction                                                                                                                        |
|                                   | Acute or chronic metabolic acidosis                                                                                                               |
|                                   | Hemodialysis, end-stage renal disease, or estimated glomerular filtration rate $<45$ in the 30 days prior to or on the day of in-person screening |

<sup>a</sup> Those in the motor study must be  $>65$  years of age with their home address  $<20$  miles of the central healthcare system academic hospital.

*Abbreviations:* SPRY: Strategies to Promote Resiliency.

## SPRY-Metformin Protocol

**Table 2. Secondary Endpoints**

|                                                                             |
|-----------------------------------------------------------------------------|
| <b>Postoperative index hospital course</b>                                  |
| Incidence and total duration of postoperative intensive care unit admission |
| Index hospital length of stay                                               |
| Hospital discharge location                                                 |
| Index hospitalization mortality rate                                        |
| <b>Within 30 days of the index operation</b>                                |
| Surgical site infection <sup>a</sup>                                        |
| Surgical Site occurrence <sup>b</sup>                                       |
| Organ failure free days <sup>c</sup>                                        |
| <b>Within 365 days of study drug exposure</b>                               |
| Incidence of re-operation                                                   |
| Number of participants with deep vein thrombosis                            |
| Number of participants with pulmonary embolus                               |
| Mortality                                                                   |
| Hospital readmission rates                                                  |

<sup>a</sup> Surgical site infection defined by National Surgical Quality Improvement Program [35]

<sup>b</sup> Surgical site occurrence defined by Ventral Hernia Working Group [36]

<sup>c</sup> Organ failure defined as mechanical ventilation, hemodialysis, or vasopressor exposure

## SPRY-Metformin Protocol

**Table 3. Longitudinal Quality of Life and Frailty Timeline**

| Baseline <sup>a</sup> | Postoperative Day 30 | Postoperative Day 90            |                                          |
|-----------------------|----------------------|---------------------------------|------------------------------------------|
|                       |                      | Phone                           | In-Person (Motor Subgroup <sup>b</sup> ) |
| EQ-5D                 | EQ-5D                | EQ-5D                           | EQ-5D                                    |
| MoCA-BLIND            |                      | FAQ                             | FAQ                                      |
|                       |                      | MoCA-BLIND                      | NIH Toolbox Cognitive                    |
|                       |                      | Haying Sentence Completion Test | 2-Minute Walk Test                       |
|                       |                      | Confusion Assessment Method     | Grip Strength                            |

<sup>a</sup> Baseline occurs within 7 days of randomization and prior to the surgical intervention.

<sup>b</sup> Omit the phone evaluation and undergo an in-person evaluation on postoperative day 90.

*Abbreviations:* (MoCA)-BLIND: Montreal Cognitive Assessment; FAQ: Functional Activities Questionnaire.

## Figure Legends

### Figure 1. Concentric Consort Diagram – SPRY Core Protocol (Panel A) and Domain-Specific Appendix SPRY-Metformin Overlying the Core Protocol (Panel B)

Panel A: The Core Protocol creates a research platform or infrastructure within clinical care for all enrolled into any SPRY Domain-Specific Appendix. This infrastructure includes virtual screening, informed consent, and randomization at preoperative clinic, automated perioperative electronic health record monitoring, and a primary outcome of 90-day hospital free days. Patient privacy is maintained and protected by the embedded application functioning behind the institutional firewall.

Panel B: The SPRY-Metformin Domain-Specific Appendix functions within the infrastructure of the SPRY Core Protocol. Prior to preoperative clinic, the SPRY-Application screens the scheduled preoperative clinic appointments and generates a list of potential patients for enrolling clinicians. In preoperative clinic recruitment, informed consent, and randomization are completed. Patients undergo baseline testing. Study drug exposure begins and continues through postoperative day 90 (green). The SPRY-Application (light blue) supports patient safety monitoring by generating EHR and email alerts, as needed. As possible, all trial aspects are embedded within the standard of care perioperative course. When 500 patients surpass postoperative day 90, *a priori* interim analysis is completed. Future enrollment is then guided by the pre-determined response adaptive randomization schemes and predetermined stopping rules.



## SPRY-Metformin Protocol

*Abbreviations:* REMAP: Randomized embedded multifactorial adaptive platform; SPRY: Strategies to Promote Resiliency; POD: postoperative day; HIPAA: Health Insurance Portability and Accountability Act.

### Figure 2. Virtual and In-Person Screening and Randomization

<sup>a</sup> <7 or >180 Preoperative Days

<sup>b</sup> Charlson Comorbidity Index (CCI) required within the 365 days prior to screening.

Virtual recruitment is completed by SPRY-Application (light blue) reviewing a subset of SPRY and SPRY-metformin enrollment criteria. The SPRY-Application then guides the clinical provider to complete the in-person screening and informed consent. Any discrepancies found between the clinical parameters within SPRY-Application and the patient's reported health state are manually updated within the EHR and patients are randomized.

### Figure 3. SPRY-Metformin Timeline

<sup>a</sup> If patients are discharged on the day of the surgical intervention, lab sample 4 will be omitted.

If hospital discharge occurs prior to postoperative day 3, lab sample 4 occur immediately prior to discharge

<sup>b</sup> Longitudinal testing at contact point 6 testing is dependent on participation in the motor subgroup (Table 3)

Patients are recruited, consented by providers, randomized, undergo baseline venous blood sampling, and are provided study drug at preoperative clinic (contact point 1). In the 7 to 180 preoperative days, patients undergo baseline testing (Table 3) and both patient safety and study drug compliance is monitored via phone interview (contact point 2). Three venous blood samples are coupled with clinical blood draws throughout the operative hospital admission

## SPRY-Metformin Protocol

(contact point 3). A final venous sample is collected in standard of care postoperative clinic (contact point 4). At postoperative day 30 and 90, patients are contacted to monitor both patient safety and study drug compliance, collect postoperative outcomes (Table 2), and complete additional outcome testing (Table 3).

*Abbreviations:* Strategies to Promote Resiliency, SPRY; Charlson Comorbidity Index, CCI; diabetes mellites type 1, DM1; diabetes mellites type 2, DM2; estimated glomerular filtration rate, eGFR; randomized embedded multifactorial adaptive platform, REMAP.

### **Figure 4. REMAP SPRY Administrative Organization**

The Trial Steering Committee receives trial updates from the Statistical Monitoring Committee as well as recommendations from the Data and Safety Monitoring Board to oversee all trial conduct.

*Abbreviations:* Strategies to Promote Resiliency, SPRY.

A

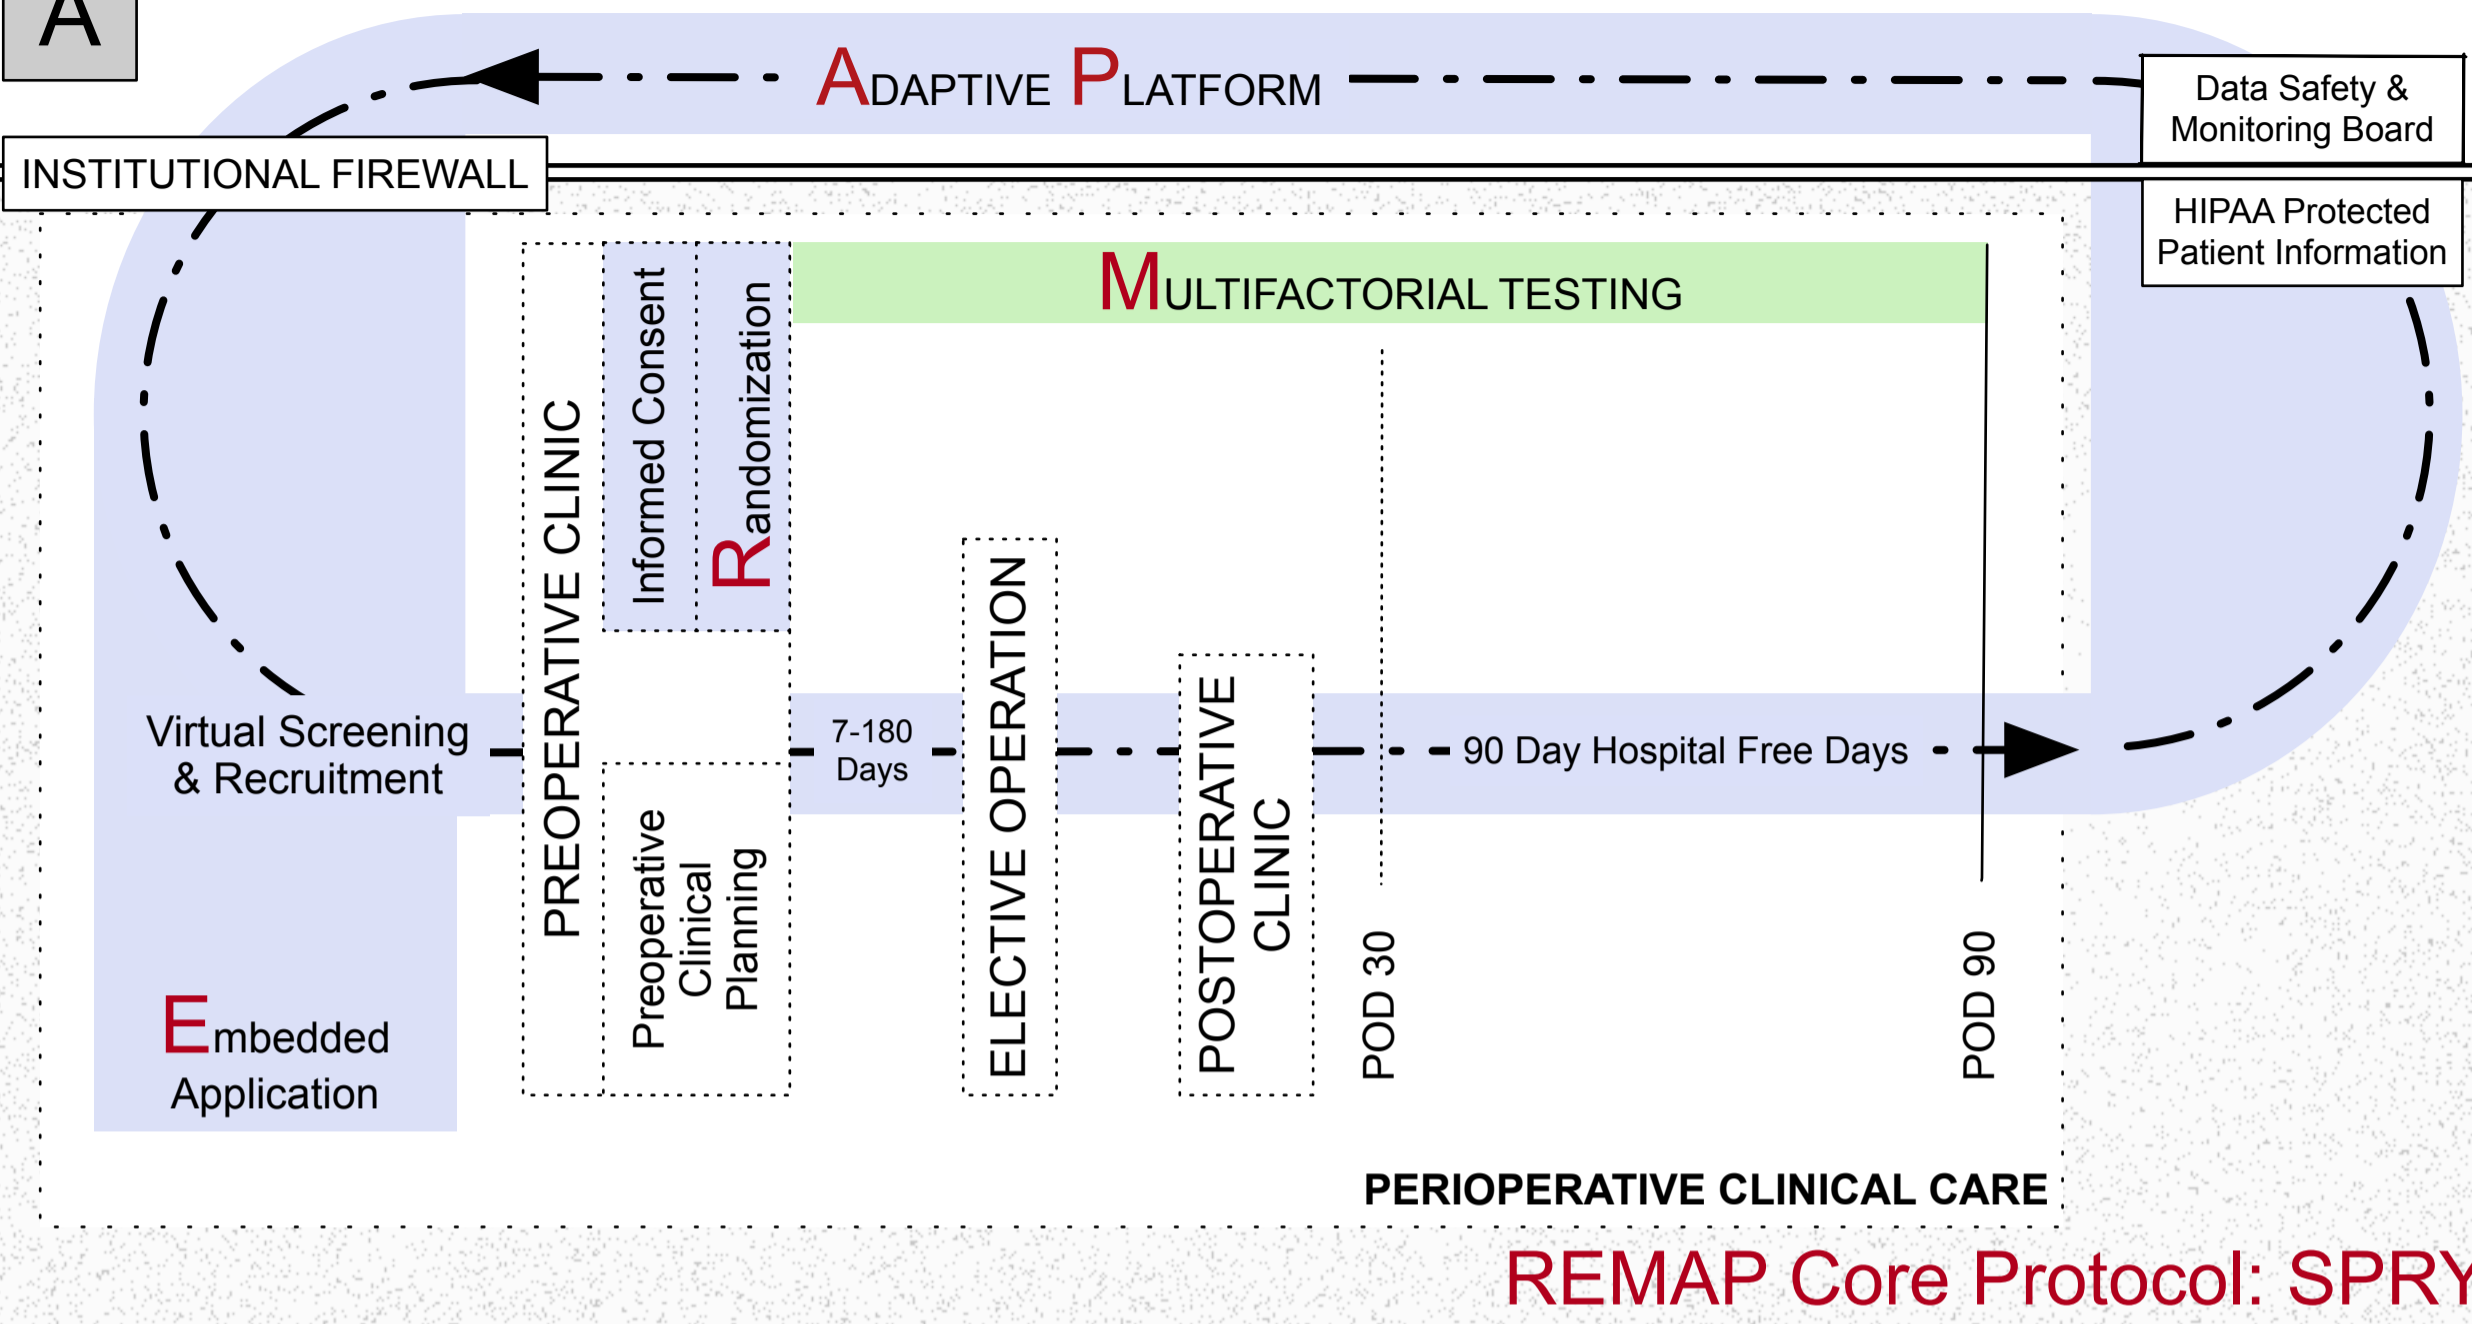

B

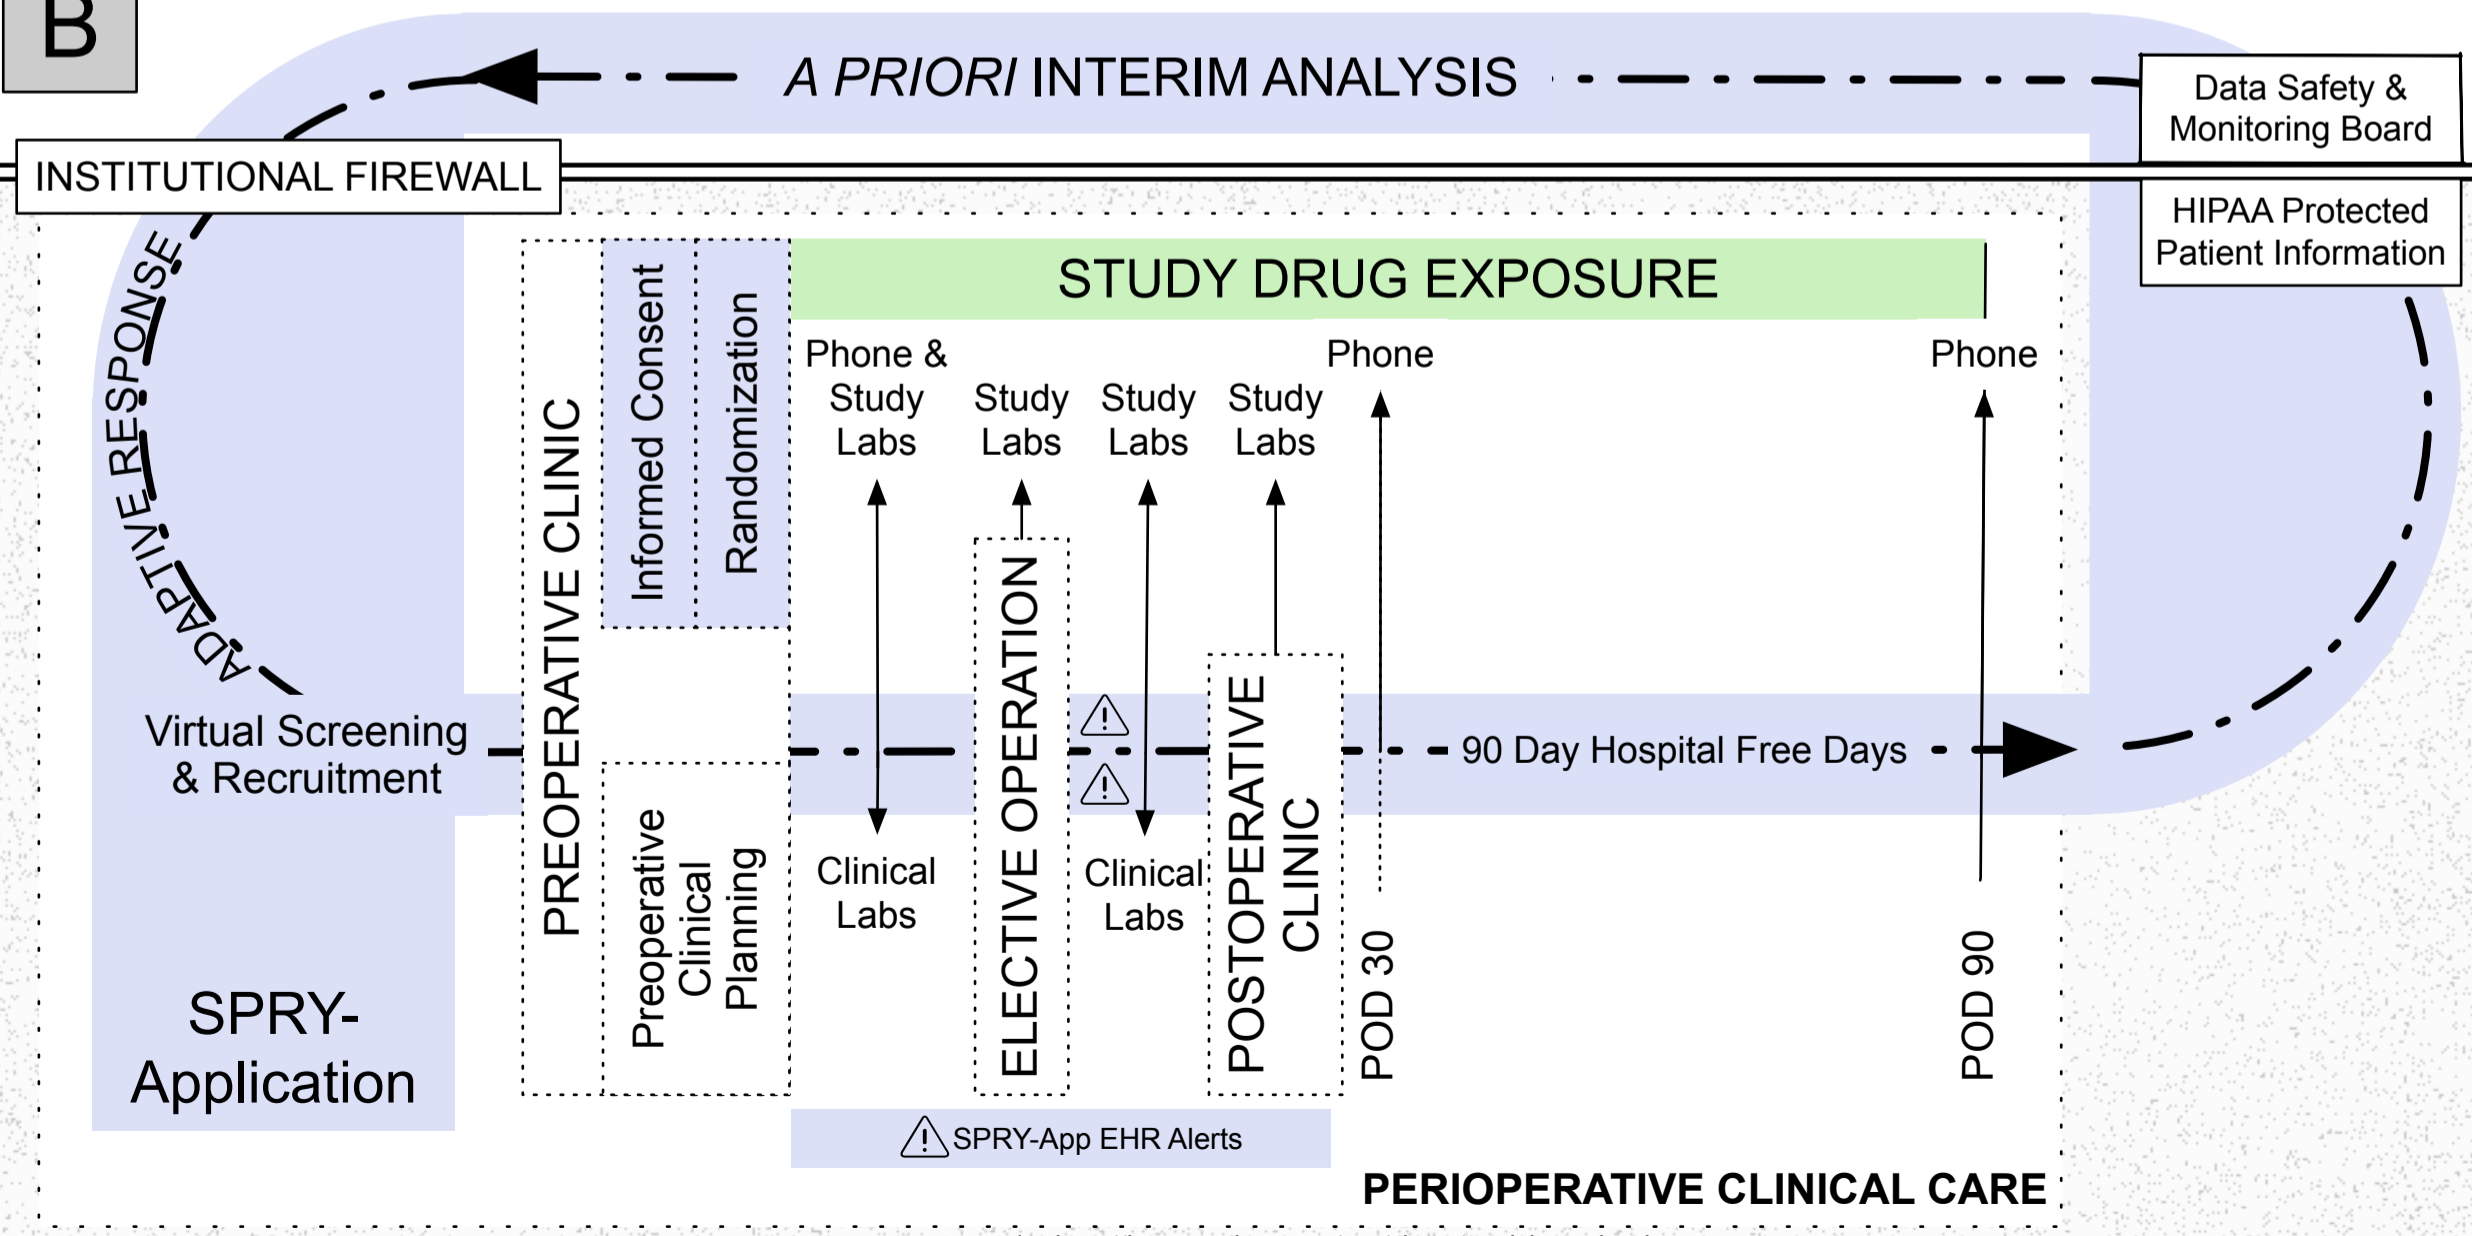

**Electronic Health Record (EHR)**

**SPRY-Application**

Preoperative Clinic Screening, Consent, Randomization:  
 Provider SPRY-App Interface

Virtual Recruitment:  
 SPRY-App Identification

Preoperative Evaluation for Elective Operation

SPRY Core Protocol Eligible

SPRY-metformin DSA Eligible

Informed Consent

Randomization

Age <18  
 Previously enrolled in REMAP  
 Incorrect preoperative window<sup>a</sup>

Age <60 and CCI<3<sup>b</sup>  
 History of DM1 or DM2  
 eGFR <45  
 Metformin allergy

Patient defers participation

Virtual recruitment confirmed:  
 Age <60 and CCI<3<sup>b</sup>  
 History of diabetes (type 1 or 2)  
 eGFR <45  
 Previously enrolled REMAP-OSO  
 Metformin allergy

Premenopausal

Unable to swallow whole pills  
 Medication exposure (<6mo):  
 Metformin  
 Active medications:  
 Carbonic anhydrase inhibitor  
 Cimetidine  
 Diabetes medications

Hemodialysis  
 History of acute or chronic metabolic acidosis  
 History of lactic acidosis  
 Severe hepatic dysfunction  
 Alcohol abuse

*EHR Reviewed & Updated*

*EHR Reviewed & Updated*

*EHR Reviewed & Updated*

1  
2  
3  
4  
5  
6  
7  
8  
9  
10  
11  
12  
13  
14  
15  
16  
17  
18  
19  
20  
21  
22  
23  
24  
25  
26  
27  
28  
29  
30  
31  
32  
33  
34  
35  
36  
37  
38  
39  
40  
41  
42  
43  
44  
45  
46  
47  
48  
49  
50  
51  
52  
53  
54  
55  
56  
57  
58  
59  
60

# STUDY DRUG EXPOSURE

BMJ Open

1  
2  
3  
4  
5  
6  
7  
8  
9  
10  
11  
12  
13  
14  
15  
16  
17  
18  
19  
20  
21  
22  
23  
24  
25  
26  
27

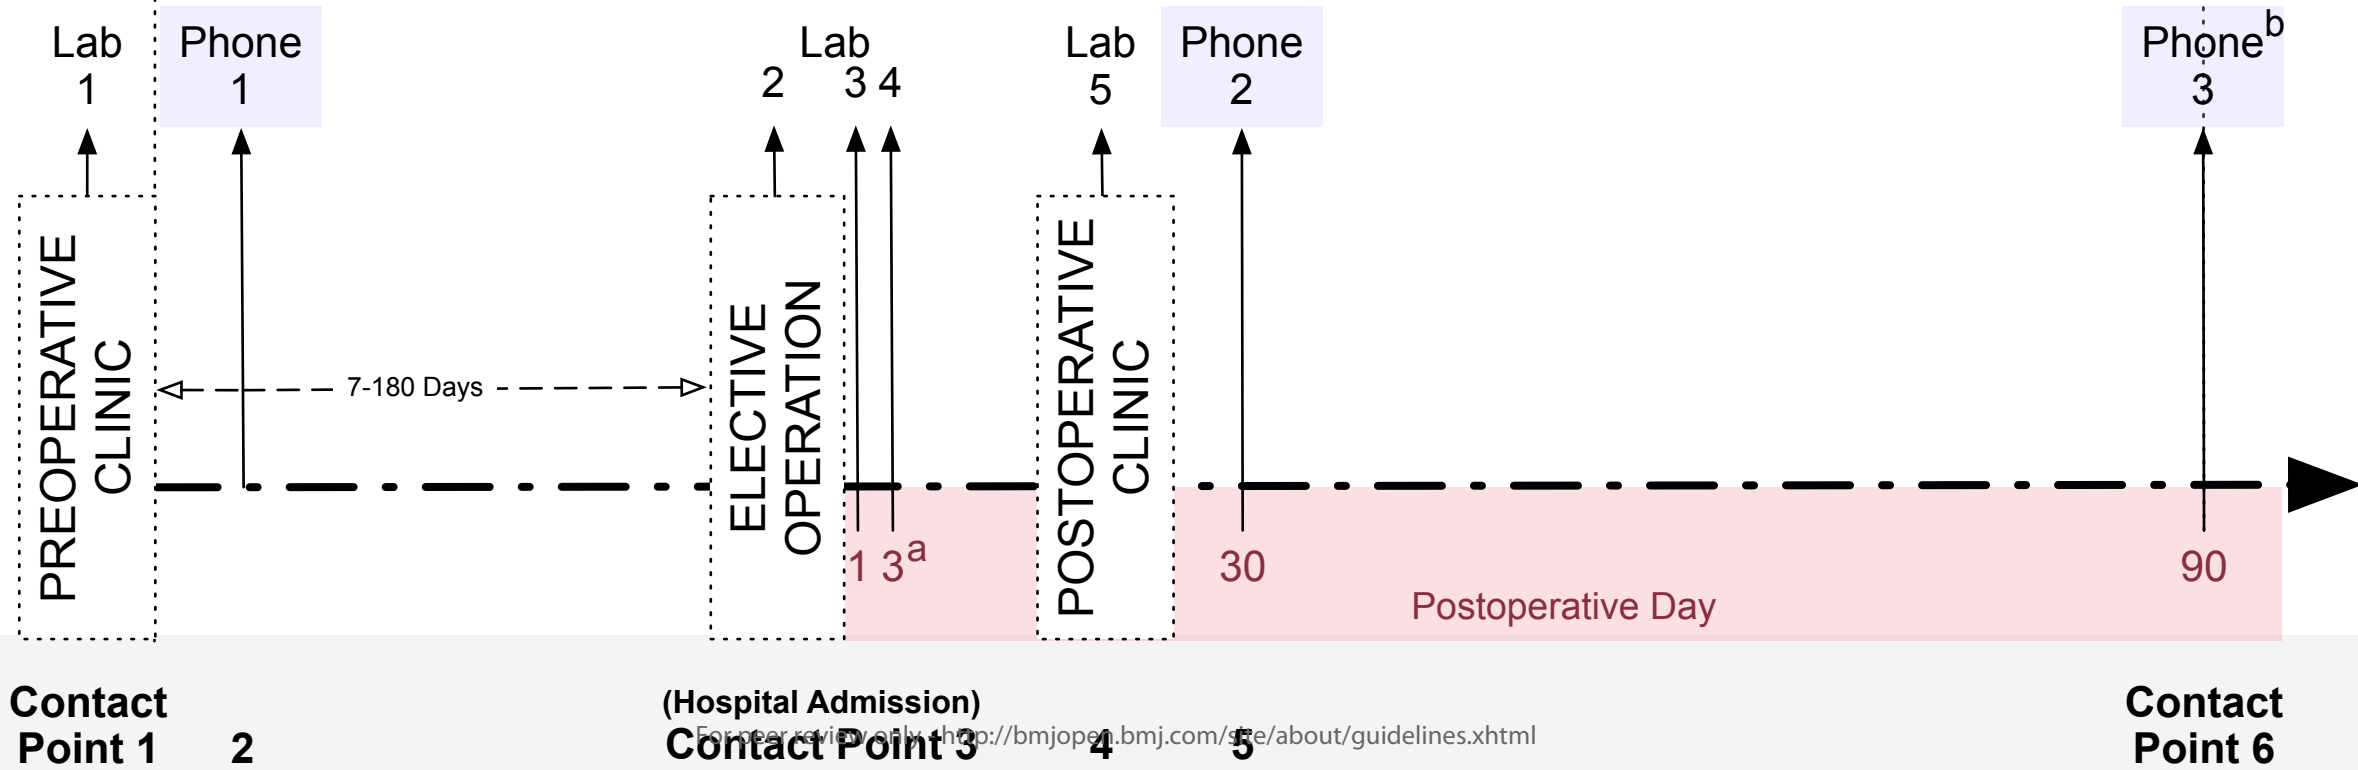

1  
2  
3  
4  
5  
6  
7  
8  
9  
10  
11  
12  
13  
14  
15  
16  
17  
18  
19  
20  
21  
22  
23  
24  
25  
26  
27  
28  
29

**Data and Safety  
Monitoring Board  
(DSMB)**

Safety  
Recommendations

Trial  
Updates

Trial  
Updates

**Trial Steering  
Committee  
(TSC)**

**Maintain the Core  
Protocol and  
Embedding**

**Establish and  
Monitor Embedding**

**Oversee  
Additional Future  
SPRY Domains**

**Oversee  
SPRY-Metformin**

30  
31  
32  
33

**Statistical Monitoring  
Committee  
(SMC)**

# Adaptive Design Report for UPMC REMAP SPRY Randomized Controlled Trial of Metformin in High Risk Surgical Patients

1/1/20202

---

## 1.0 Introduction

SPRY is a randomized control trial comparing the effectiveness of different doses and durations of metformin to placebo for nondiabetic patients with elective surgeries. In particular, we will evaluate 3 doses of metformin (500, 1000 and 1500mg) as well as 3 levels of pre-op duration of metformin (short, 7-28 days; intermediate, 29-90 days; and long, 90 days). Patients will be randomized to one of the three metformin doses or placebo but will not be randomized to the pre-op duration. Pre-op duration will be observed based on the timing of the first pre-op visit.

The primary endpoint to determine efficacy of metformin relative to placebo is hospital free days (HFD) at day 90 after the surgical encounter after administration of metformin vs. placebo. HFD at day 90 is an ordered categorical variable that takes on discrete integer values from -1 to 90 and is calculated as 90 minus the number of days of the index stay and the number of days readmitted within the 90-day time period following the surgical encounter. If mortality occurs within the 90-day time period, the patient is given an HFD value of -1 (ordered to be a worse outcome than being in the hospital for all 90 days).

There will be a maximum of 2000-2500 patients randomized in the trial. Within each of the 3 pre-op durations, patients will initially be randomized  $\sqrt{3}:1:1:1$  to placebo and the 3 doses of metformin until a total of 500 patients have been randomized across all pre-op durations and followed for 90 days. Afterwards, interim analyses will occur sequentially after an additional 500 patients have been followed for 90 days. At each interim analysis, the trial can be stopped early for demonstrating efficacy of one of the metformin doses compared to placebo (see Section 3.1). If the trial has not stopped for success and continues enrolling, within each pre-op duration doses can be dropped for futility and responsive adaptive randomization will be used to randomize patients preferentially to the best performing metformin doses of all of the remaining doses within that pre-op durations (see Sections 3.2-3.3). The trial can stop enrolling patients within a pre-op duration if all metformin doses have been stopped within that duration for futility (see Section 3.2). Finally, at the interim when 2000 patients have been randomized across all pre-op durations and followed for 90 days, the maximum sample size could be increased from 2000 to 2500 (see Section 3.4).

## 2.0 Statistical Modeling

Inferences and quantities of interest used for response adaptive randomization, success or futility of metformin doses, and increasing the maximum sample size in this trial are based a Bayesian ordinal logistic regression model that accounts for differences in the

1  
2  
3 expected 90-day HFD distribution depending on surgical procedure or strata of the  
4 patient.  
5

## 6 **2.1 Bayesian Ordinal Logistic Regression**

7  
8  
9 Throughout we assume for patient  $i$ ,  $Y_i$  is the observed 90-day HFD,  $g(i)$ , is the surgical  
10 strata from 1:G,  $d(i)$  is the pre-op duration from 1:3 with 1 = short, 2 = intermediate, and  
11 3=long, and  $t(i)$  is the intervention from 1:4 with 1 = placebo, 2 = 500mg, 3 = 1000mg,  
12 and 4 = 1500mg.  
13

14 A Bayesian ordinal logistic regression model is used to estimate the effect of dose and  
15 duration of metformin on the distribution of HFD under placebo adjusting for expected  
16 differences given the surgical type/strata. The ordinal scale parameterization is a  
17 generalized version of the dichotomous parameterization where we model all cumulative  
18 probabilities of 90-day HFD being less than or equal to a cut point  $c$ , where  $c=-1, \dots, 89$ .  
19 Given each cut point  $c$ , we denote the 91 dichotomized versions of 90-day HFD for  
20 patient  $i$  as  $Y_{c,i}$  where  $Y_{c,i} = 1$  if 90-day HFD is in  $[-1, c]$  and  $Y_{c,i} = 0$  if 90-day HFD is in  
21  $[c+1, 90]$  for  $c=-1, \dots, 89$ .  $Y_{c,i}$  is then modeled throughout as:  
22  
23

$$24 \quad Y_{c,i} \sim \text{Bernoulli}(\phi_{c,i}), c = 1 \dots 89;$$

$$25 \quad \text{logit}(\phi_{c,i}) = \gamma_c + \mu_i;$$

26  
27  
28 where  $\mu_i$  is a patient-specific mean function and  $\gamma_c$  is common across all patients.  
29  
30

31 The subject-specific mean function is as follows:  
32

$$33 \quad \mu_i = \alpha_{g(i)} + \theta_{t(i),d(i)}, i = 1 \dots N.$$

34  
35  
36 Within this model we assume that the underlying distribution of HFD is different within  
37 each stratum,  $g$ , and these differences across strata can be explained by a proportional  
38 log-odds ratio shift in the HFD distribution,  $\alpha_g$ . Furthermore, we assume that the effects  
39 of each intervention within each pre-op duration are constant across strata and can be  
40 explained by a proportional log-odds ratio shift in the HFD distribution  $\theta_{t,d}$ . Where a  
41 log-odds ratio  $\theta_{t,d} < 0$  results in an increase in expected HFD. For identifiability we  
42 assume the effect of placebo across all durations is zero,  $\theta_{1,d} = 0$  for all  $d = 1:3$ . As  
43 such, the values of the inverse logit of  $\gamma_c$  define the cumulative probabilities for each  
44 HFD value under placebo, common across pre-op durations, and averaged across all  
45 strata. For all doses of metformin, we assume that the log-odds ratio of the effect of the  
46 dose is dependent on the pre-op duration and takes on the following form:  
47  
48  
49

$$50 \quad \theta_{t,d} = \beta_t + \kappa_d + \delta_{t,d} \text{ for } t > 1, t = 1 \dots 4, d = 1 \dots 3.$$

51  
52 Here,  $\beta_t$  is the log-odds ratio due to the dose,  $\kappa_d$  is the log-odds ratio due to the duration  
53 and  $\delta_{t,d}$  is an interaction between dose and duration.  
54  
55  
56  
57  
58



## 2.2 Model Priors

The prior distribution of  $\gamma_c$  is specified on the probability scale:

$$\pi \sim \text{Dirichlet}(\alpha_{-1}, \dots, \alpha_{90});$$

$$\gamma_c = \text{logit} \left( \sum_{i=-1}^c \pi_i \right), c = 1 \dots 89;$$

with hyper-parameters,  $\alpha_h$ , specified based on the observed rates of HFD across all strata in pre-trial data (discussed in Section 4) and providing 1 patient worth of information so that  $\sum_{h=-1}^{90} \alpha_h = 1$ .

For the strata-specific log-odds ratios we place a normal prior distribution with mean 0 and standard deviation 2:

$$\alpha_g \sim N(0, 2^2), g = 1 \dots G.$$

Within pre-trial data (discussed in Section 4), the standard deviation of the log-odds ratios across surgical types/strata was estimated to be 1.5.

We assume a hierarchical distributions for the dose-effects and duration-effects each centered around a common mean so there is borrowing of information across doses and durations:

$$\beta_t \sim N(\mu_\beta, .5^2); \mu_\beta \sim N(0, 1), t = 1 \dots 4;$$

$$\kappa_d \sim N(\mu_\kappa, .5^2); \mu_\kappa \sim N(0, 1), d = 1 \dots 3.$$

Finally, we assume that the interaction between dose and duration has a normal prior distribution with mean 0 and standard deviation .2 to limit the amount of deviation of the overall effect,  $\theta_{t,d}$ , from the two additive effects.

## 2.3 Quantities of Interest

The following statistical quantities are used in the design of the trial. The posterior distribution of all model parameters is calculated using MCMC. The algorithm allows the generating of M (ex. 100,000) draws from the joint posterior distribution for all model parameters.

### 2.3.1 Probability beat placebo by CSD

To determine if a dose should be dropped within a duration or if we should increase the sample size at N=2000, we summarize the posteriority probability that each dose and duration of metformin is superior to placebo by some clinically significant difference (CSD). The CSD is defined as an odds ratio of .8. Thus, we are interested in the

probability  $\exp(\theta_{t,d}) < .8$ . This quantity is calculated from the M samples of the posterior distribution of the effect of each dose and duration,  $\theta_{t,d}$ , by reporting the proportion of posterior samples in which the odds ratio,  $\exp(\theta_{t,d})$  is less than .8:

$$\Pr(\exp(\theta_{t,d}) < .8 | Y) = \frac{1}{M} \sum_{m=1}^M (\exp(\theta_{t,d}) < .8), t = 1 \dots 4, d = 1 \dots 3.$$

### 2.3.2 Probability of Optimal Dose within each Duration

Within a pre-op duration, we will use response adaptive randomization to allocate the next set of patients to all doses that have not been stopped for futility based the posterior probability that each dose is optimal within each pre-op duration. This quantity is calculated from the M samples of the posterior distribution of the effect of each dose within each duration,  $\theta_{t,d}$ , by reporting the proportion of posterior samples in which the log odds ratio for dose  $t$ ,  $\theta_{t,d}$  is the min observed effect across all three metformin doses  $t=2:4$  with duration  $d$ :

$$O(t, d) = \frac{1}{M} \sum_{m=1}^M I[\theta_{t,d} < \theta_{j,d} \text{ for all } j \neq t], t = 1 \dots 4, d = 1 \dots 3.$$

### 2.3.3 Probability of Superiority

To determine if the trial should stop early for success at any interim or if the trial is successful at the final analysis, we summarize the posteriority probability that each dose of metformin is superior to placebo. For the superiority analysis, we estimate the effect of each dose of metformin by pooling across all actively enrolling durations. This is achieved by using the model described in Section 2.1 with the additional assumption that  $\theta_t = \theta_{t,1} = \theta_{t,2} = \theta_{t,3}$ . The posterior distribution of the pooled effect of each dose,  $\theta_t$ , is this estimated by calculating M samples of the posterior distribution using only data from the actively enrolling doses within each duration. The probability of superiority of each dose relative to placebo is then calculated as the proportion of the M samples with  $\theta_t$  less than zero:

$$\Pr(\theta_t < 0 | Y) = \frac{1}{M} \sum_{m=1}^M \theta_t < 0, t = 1 \dots 4.$$

## 3.0 Interim Analyses and Trial Adaptations

Before interim analyses begin, patients will be randomized  $\sqrt{3}:1:1:1$  to placebo and the three doses of metformin within each pre-op duration. Interim analyses will then begin when 500 total patients across all doses and durations are randomized and have been followed for 90 days and will continue after every additional 500 patients have been followed for 90 days. Thus, there are 4 total interims at 500, 1000, 1500, and 2000

patients with 90-day follow-up and a final analysis when 2500 patients have been followed for 90 days. At each interim we allow the following adaptations:

- Success
- Dose / Duration Dropping
- Response Adaptive Randomization

### 3.1 Success

Success will be declared at an early interim or at the final analysis, and the trial will stop if the posterior probability of superiority of any dose of metformin relative to placebo defined in Section 2.3.3 is greater than a pre-defined interim-specific threshold. The thresholds for each interim are reported in Table 3.1.1 and are based on an O'Brien Fleming spending function assuming a maximum sample size of 2500:

| <b>Analysis</b>          | <b>500</b>   | <b>1000</b>  | <b>1500</b>  | <b>2000</b>  | <b>2500</b>  |
|--------------------------|--------------|--------------|--------------|--------------|--------------|
| <i>Success Threshold</i> | <i>.9999</i> | <i>.9999</i> | <i>.9985</i> | <i>.9950</i> | <i>.9894</i> |

### 3.2 Dose / Duration Dropping

Metformin doses will be dropped within a duration based on the probability of futility defined in Section 2.3.1. Specifically, for dose  $t$  in duration  $d$  if

$$\Pr(\exp(\theta_{t,d}) < .8 \mid Y) < .15, t = 1 \dots 4, d = 1 \dots 3;$$

dose  $t$  will be dropped in duration  $d$  and patients within that duration will no longer be randomized to that dose.

We require an additional order restriction on dose dropping so that a dose must be dropped first in the short duration, then the intermediate duration then the long. Therefore, a dose cannot be dropped in the intermediate duration until it has first been dropped in the short and cannot be dropped in the long duration until it has first been dropped in the short and intermediate.

Enrollment to a pre-op duration will be stopped if all doses within that duration have been stopped and the trial will stop for futility if all pre-op durations have been stopped.

### 3.3 Response Adaptive Randomization within Durations

1  
2  
3 Within each pre-op duration of metformin, we will use response adaptive randomization  
4 to allocate patients to the most optimal dose of metformin within that pre-op duration.  
5 Initial randomization is set to  $\sqrt{3}:1:1:1$  to placebo and the 3 doses of metformin within  
6 each duration. This allocates approximately .366 percent of the patients to placebo. This  
7 percentage allocation to placebo will be maintained throughout the course of the trial.  
8 However, after the first interim analysis, the remaining .634 percent of patients will be  
9 allocated to metformin doses within each duration that have not been dropped for futility  
10 and preferentially based on the probability that the dose is optimal within the duration  
11 defined in Section 2.3.2 and renormalized over the currently enrolling doses.  
12  
13

### 14 **3.4 Increasing maximum sample size to 2500**

15  
16  
17 At the interim analysis when 2000 patients are randomized and followed for 90 days the  
18 maximum sample size will increase to 2500 if at least one dose within one pre-op  
19 duration meets the following criteria:  
20

$$21 \Pr(\exp(\theta_{t,d}) < .8 \mid Y) > .50, t = 1 \dots 4, d = 1 \dots 3.$$

22  
23  
24 After 2000 patients have been randomized and are waiting to be followed for 90 days,  
25 enrollment will continue until the interim analysis takes place. If the above criteria is  
26 met, enrollment will continue to a maximum of 2500. If the above criteria is not met,  
27 enrollment will stop.  
28  
29

## 30 **4.0 Clinical Trial Simulations**

31  
32 To create realistic clinical trial simulations, we obtained pre-trial data from patients  
33 within the UPMC electronic health records who had received an in-patient elective  
34 surgery and met the additional inclusion/exclusion criteria:  
35

- 36 • Inclusion:
  - 37 ○ Age > 60 or RAI > 30 or CCI > 2
  - 38 ○ Surgery performed in either PUH or SHY hospitals
- 39 • Exclusion:
  - 40 ○ Diabetes or previous metformin use
  - 41 ○ Had one of the following surgery types:
    - 42 ■ Minimally invasive cholecystectomy
    - 43 ■ Irrigation and debridement of a wound
    - 44 ■ Hyst. Total abdomen
    - 45 ■ Vaginal Hyst.
    - 46 ■ Sleeve Gast.

47  
48  
49  
50 This resulted in data from 16,932 patients across 376 surgery types. Table 4.1 provides  
51 summaries of the data by clustering each surgery type into one of 14 surgical specialties.  
52 In particular, for each surgical specialty we report: total number of patients, total number  
53 of surgical types, mean and median HFD, and 90-day mortality rates.  
54  
55

56 **Table 4.1: Summary Pre-Trial Data**

|              | Total N      | Surgical Procedures/ Strata | Mean HFD    | Median HFD  | Mort. Rate  |
|--------------|--------------|-----------------------------|-------------|-------------|-------------|
| <b>Total</b> | <b>16832</b> | <b>376</b>                  | <b>79.5</b> | <b>86.0</b> | <b>0.05</b> |
| ORTHO        | 3849         | 72                          | 83.2        | 87.0        | 0.03        |
| SPINE        | 2884         | 25                          | 83.6        | 87.0        | 0.02        |
| CARDIAC      | 1979         | 34                          | 75.5        | 83.0        | 0.07        |
| GENERAL      | 1692         | 52                          | 70.9        | 82.0        | 0.10        |
| UROLOGY      | 1221         | 21                          | 85.2        | 88.0        | 0.01        |
| THORACIC     | 1130         | 35                          | 76.7        | 84.0        | 0.06        |
| NEURO        | 1099         | 35                          | 78.0        | 87.0        | 0.08        |
| VASCULAR     | 1043         | 39                          | 77.7        | 86.0        | 0.07        |
| HPB          | 729          | 16                          | 78.6        | 84.0        | 0.03        |
| COLORECTAL   | 707          | 20                          | 77.0        | 84.0        | 0.04        |
| ENT          | 334          | 8                           | 79.6        | 86.0        | 0.04        |
| TRANSPLANT   | 136          | 8                           | 71.0        | 81.5        | 0.01        |
| GYNE         | 15           | 7                           | 80.1        | 86.0        | 0.07        |
| BARIATRIC    | 14           | 4                           | 73.3        | 80.0        | 0.07        |

#### 4.1 Virtual Patient Simulation

Within each simulation, we assumed that the SPRY trial would enroll subjects from all strata that had at least 50 subjects in the pre-trial data (77 total) with the proportion of patients within each enrolling stratum estimated from the pre-trial data. We also assume that the HFD distribution per strata under placebo is the same as what was observed in the pre-trial data. Finally, we assume treatment effects for each metformin dose can be summarized as a common percent reduction in the mean hospital days (HD) across all strata. This treatment effect is assumed to be 0% for all null scenarios and a maximum of 15% for all alternative scenarios. To obtain a common percent reduction in mean HD across all strata we find the strata-specific odds ratio shift under treatment relative to the empirical HFD distribution under placebo that results in the assumed common percent reduction in HD per strata.

For example, Figure 4.1 plots the assumed HFD distribution under placebo and under a 15% reduction in HD for the most common surgical type, Total knee arthroplasty. Within the pre-trial data there were 1115 patients who received a total knee arthroplasty. The empirical HFD distribution observed in the pre-trial patients and assumed for placebo within this stratum is plotted in blue with approximately 10% of patients having 89 HFD, 35% with 88 HFD and 29% with 87 HFD. Across all patients, the mean HFD is 86.6. To achieve a treatment effect of a 15% reduction in HD (plotted in green) we would need an odds ratio shift in the treatment distribution relative to placebo of .62. This would result in a mean reduction in HD of .5. This would shift approximately 15% of patients under treatment to 89 HFD, 42% to 88 HFD and 25% to 87 HFD.

Similar summaries for the 10 most common surgical types are provided in Table 4.2.

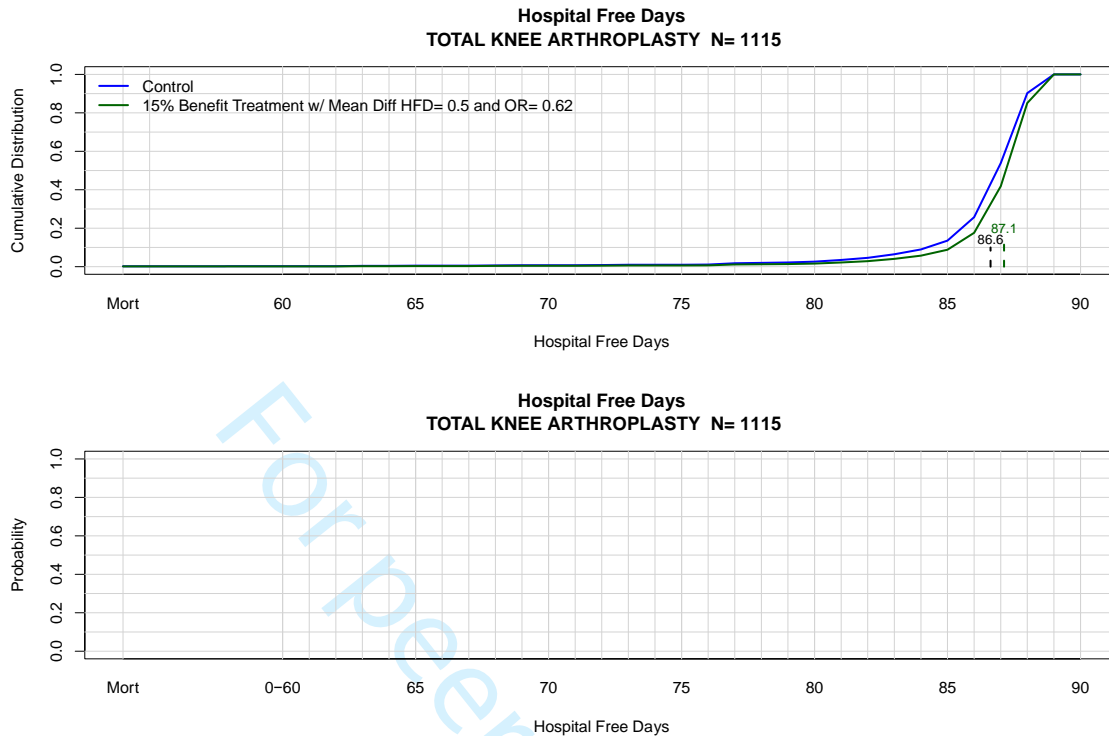

Figure 4.1: Example Strata-Specific HFD distribution under placebo vs. treated with a 15% reduction in HD for Total Knee Arthroplasty.

| Table 4.2: Summary of Control Distributions and Treatment effects for 10 most common surgical types. |               |                  |                                             |                                                   |
|------------------------------------------------------------------------------------------------------|---------------|------------------|---------------------------------------------|---------------------------------------------------|
|                                                                                                      | Prop. Overall | Mean HFD Control | Mean Diff. Under Common 15% Reduction in HD | Odds-Ratio Shift Under Common 15% Reduction in HD |
| <b>Total Knee Arth.</b>                                                                              | 0.08          | 86.6             | 0.5                                         | 0.62                                              |
| <b>Spine Post. Fuse Internal Fix.</b>                                                                | 0.07          | 82.8             | 1.1                                         | 0.71                                              |
| <b>Total Hip Arth.</b>                                                                               | 0.05          | 85.6             | 0.7                                         | 0.72                                              |
| <b>Endo. Aortic Valve Replace</b>                                                                    | 0.03          | 79.2             | 1.6                                         | 0.78                                              |
| <b>Spine Ant. Cervical Dissect. and Fuse</b>                                                         | 0.03          | 86.2             | 0.6                                         | 0.77                                              |
| <b>Spine Post. Lumbar or Thoracic</b>                                                                | 0.03          | 84.7             | 0.8                                         | 0.77                                              |
| <b>MIS Partial Pulmonary Lobectomy</b>                                                               | 0.02          | 83.2             | 1.0                                         | 0.73                                              |
| <b>Prostatectomy Lap. Robotic Assist.</b>                                                            | 0.02          | 88.6             | 0.2                                         | 0.50                                              |
| <b>Laparotomy</b>                                                                                    | 0.02          | 64.1             | 3.9                                         | 0.76                                              |
| <b>Total Hip MIS 2 Incisions</b>                                                                     | 0.02          | 88.0             | 0.2                                         | 0.76                                              |

## 5.0 Example Trials

We provide example data and results for two simulated example trials. In particular, for each interim in each example trial we provide a plot of the data and results (ex. Figure 5.1.1). Each plot shows the following:

- Top Left: Allocation to each dose and the number of patients within each duration for each dose.
- Top Middle: Mean estimates (circles) and CI for the ORs for each dose and duration of metformin as well as pooled for each dose (above the P and in grey) across all actively enrolling durations. The confidence intervals show the lower .15 quantile so that if the lower bar goes above .8 the dose may stop for futility and the upper Xth quantile where X is interim specific success threshold based on the success rules provided in Table 3.1.1 so that if the upper bar goes below 1 for the pooled estimate, the dose will be declared a success. Raw OR values are provided plotted as stars.
- Top Right: The new allocation probabilities within each duration for placebo and the 3 metformin doses.
- Bottom: Cumulative probabilities of observing each HFD value or less for Placebo and each dose of metformin averaged across all durations and separately within each duration. As the curves move down and to the right, the expected HFD is increasing and the number of expected HD is decreasing.

### 5.1 Example Trial 1

Figure 5.1.1 shows results from the first interim analysis when 500 patients have 90-day data. Approximately 200 patients have been allocated to placebo and 100 to each of the 3 metformin doses. Estimates for the OR of all doses (500, 1000 and 1500) given at the short duration are 1.2 or greater, all have a posterior probability that the OR < .8 less than 15%, and all are stopped for futility. Thus, the trial stops enrolling in the short duration. All doses are still enrolling in the medium and long durations. Within the intermediate duration the 1500mg dose has an OR estimated around .75, and the 1000 and 500mg have an OR estimated around .85. Therefore, the new allocation probabilities are weighted towards the 1500mg dose within the intermediate duration. Within the long duration the 1500 and 1000mg doses have an OR estimated around .6 and are preferentially allocated to over the 500mg dose which has an estimated OR of .85.

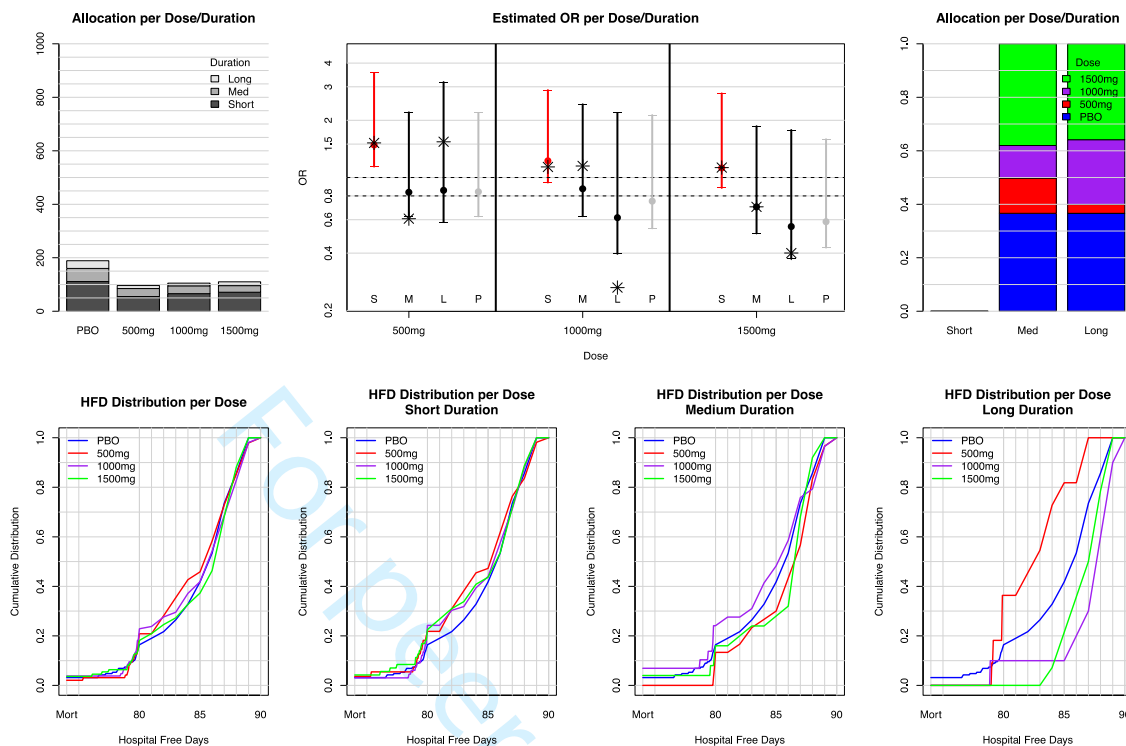

Figure 5.1.1: Example Trial 1; Interim N=500



Figure 5.1.2 shows results from the second interim analysis when 1000 patients have 90-day data. Approximately 375 patients have been allocated to placebo, 150 to 500mg, 200 to 1000mg and 300 to 1500mg. No new patients have been enrolled in the short duration. Within the intermediate duration the 1500mg dose has an OR estimated around .70, and the 1000 and 500mg have an OR estimated around .90. Therefore, the new allocation probabilities are weighted towards the 1500mg dose and away from the 1000 and 500mg dose within the intermediate duration. Within the long duration the 1500mg and 1000mg doses have an OR estimated around .65 and .75 respectively and are preferentially allocated to over the 500mg dose which has an estimated OR greater than 1. The 500mg dose in the long duration has less than a 15% posterior probability of having an OR < .8. However, it is not stopped since the intermediate duration has not stopped yet for this dose.

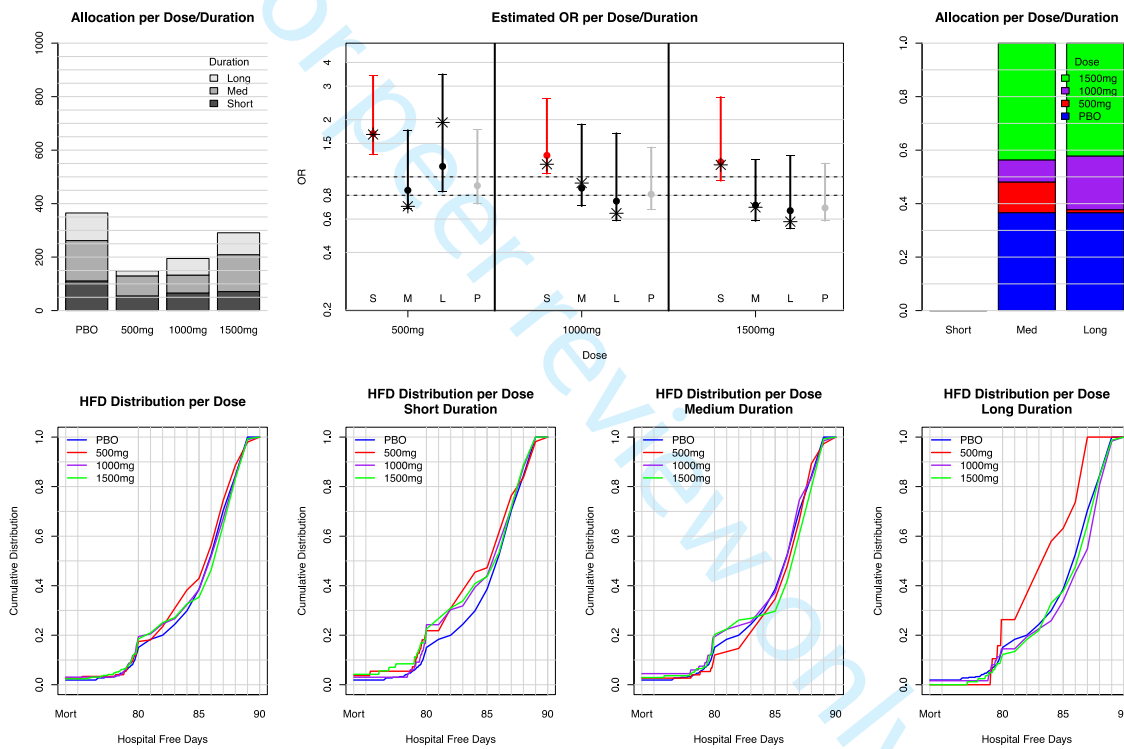

Figure 5.1.2: Example Trial 1; Interim N=1000

Figure 5.1.3 shows results from the third interim analysis when 1500 patients have 90-day data. Approximately 550 patients have been allocated to placebo, 200 to 500mg, 250 to 1000mg and 500 to 1500mg. No new patients have been enrolled in the short duration. The 500mg dose is stopped in both the intermediate and long durations. Within the intermediate and long durations, the 1500 and 1000mg doses have an OR estimated around .80 and have approximately equal allocations within each duration.

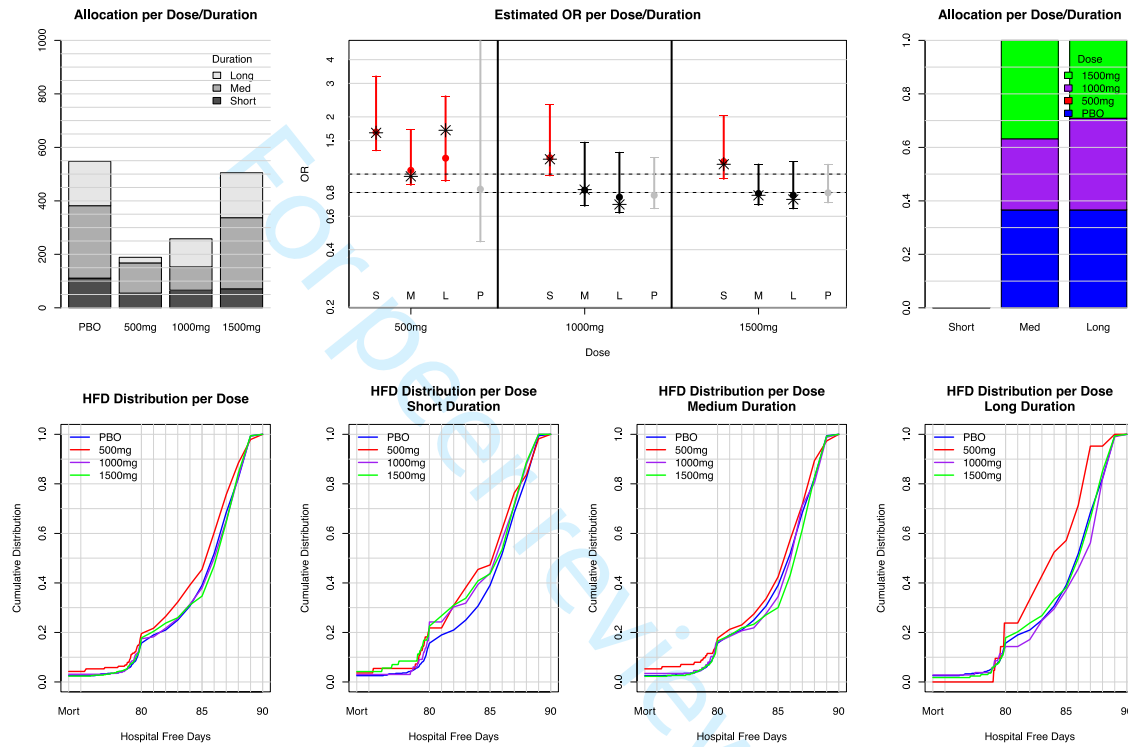

Figure 5.1.3: Example Trial 1; Interim N=1500

Figure 5.1.4 shows results from the fourth interim analysis when 2000 patients have 90-day data. Approximately 725 patients have been allocated to placebo, 200 to 500mg (no new patients), 425 to 1000mg and 675 to 1500mg. No new patients have been enrolled in the short duration. The pooled estimate across all actively enrolling durations (intermediate and long) for the 1000mg dose is approximately .75 and the upper limit of the CI has dropped below 1. Therefore, the posterior probability that the OR<1 for the 1000mg dose is greater than the interim-specific threshold (.995) and the study is stopped for success.

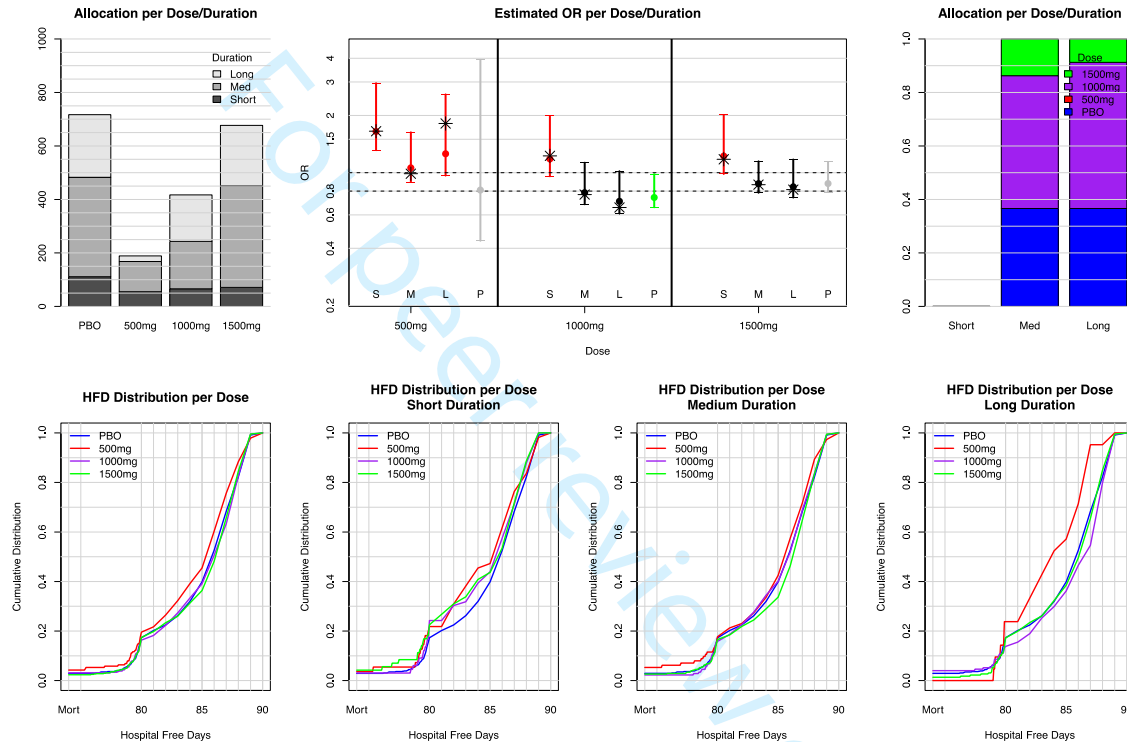

Figure 5.1.4: Example Trial 1; Interim N=2000

5.2 Example Trial 2

Figure 5.2.1 shows results from the first interim analysis when 500 patients have 90-day data. Approximately 200 patients have been allocated to placebo and 100 to 500, 1000 and 1500mg each. Within the cumulative distribution plots, the curves for each dose of metformin within each duration are mostly to the left and above the curve for placebo, indicating less HFD for each dose in each duration relative to placebo. For all doses within all durations the OR is estimated to be greater than 1.3 and the posterior probability that the OR < .8 is less than 15%. Thus, the trial stops for futility at the first interim analysis.

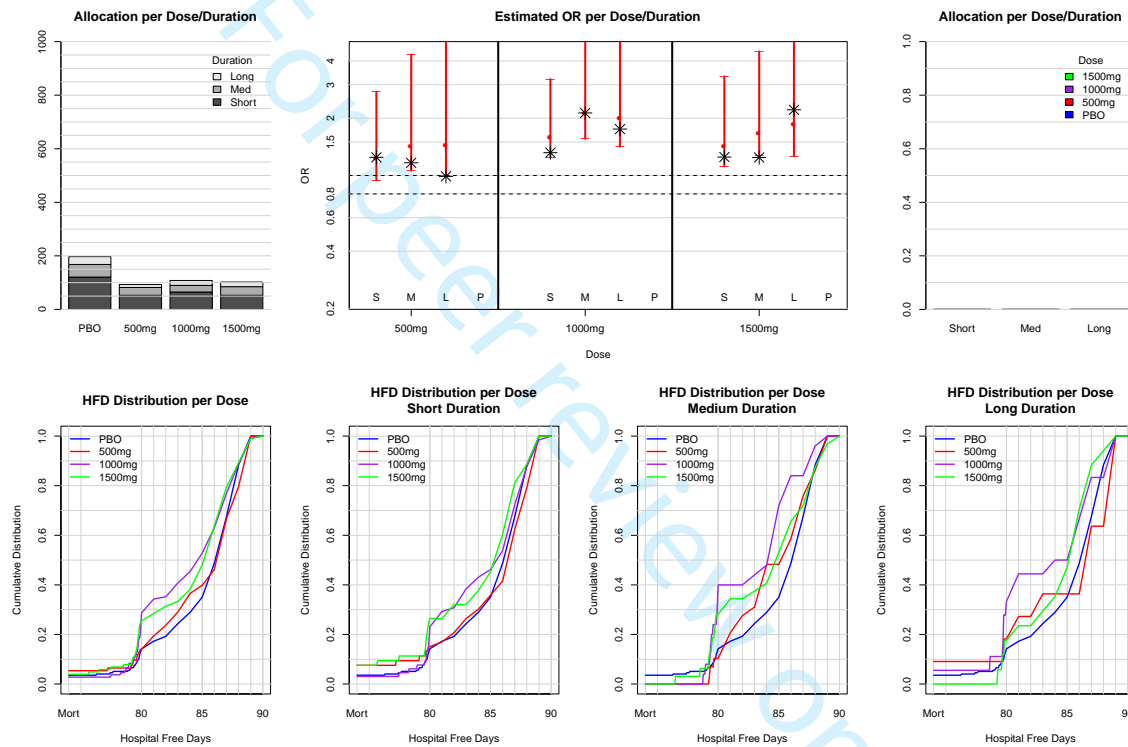

Figure 5.2.1: Example Trial 2; Interim N=500

## 6.0 Operating Characteristics

We simulate clinical trials under 7 possible treatment effect scenarios. Under the null scenario we assume that there is a 0% reduction in HD across all doses and all durations of metformin. Under all other scenarios we assume that the max effect is a 15% reduction in HD. The effect for each dose and duration is specified based on the dose-response and duration-response assumptions. We simulate under 3 different dose-response profiles. Under the “plateau” dose-response profile we assume a 7.5% reduction of the 500mg dose and a 15% reduction for the 1000 and 1500 mg doses. Under the “one good” profile we assume that there is a 0% reduction in HD for the 500 and 1000mg doses and a 15% reduction for the 1500mg dose. Under the “linear” profile, we assume a 3.75% reduction in HD for the 500mg dose, a 7.5% reduction for the 1000mg dose and a 15% reduction for the 1500mg dose. We also simulate under 2 different duration-response profiles, one where all durations work equally well and one where the intermediate and long durations work equally well but the short duration does not work for all doses. For each simulation we assume that 40% of the patients will have a short duration, 35% an intermediate duration and 25% a long duration.

Under each treatment effect scenario, we simulate 1000 clinical trials and report the following operating characteristics in Table 6.1:

- Probability of early success and total success
- Mean number of subjects enrolled in the trial
- Probability of stopping the short duration, intermediate duration or all of the durations
- Probability each dose is selected as best
- Probability increase sample size to 2500

The overall Type I error of the trial is 2.4% with 1% of the null trials stopping early for success and 91% of the null trials stopping early for futility or not increasing to the maximum sample size of 2500. The mean number of patients enrolled under the null scenario is 676. The probability the sample size is increased to 2500 under the null is 8%.

The power of the trial under the alternative scenarios ranges from 77-92% with the mean number of patients enrolled ranging from 1725 to 1822. When the short duration does not work, the probability of stopping the short duration is 80-84%. Across all alternative scenarios, we are choosing the right dose (a dose that has the maximum 15% reduction in HD effect) 79-96% of the time. Finally, the maximum sample size is increased from 2000-2500 21-31% of the time.

1  
2  
3  
4  
5  
6  
7  
8  
9  
10  
11  
12  
13  
14  
15  
16  
17  
18  
19  
20  
21  
22  
23  
24  
25  
26  
27  
28  
29  
30  
31  
32  
33  
34  
35  
36  
37  
38  
39  
40  
41  
42  
43  
44  
45  
46  
47  
48  
49  
50  
51  
52  
53  
54  
55  
56  
57  
58  
59  
60

| Dose Response | Duration Response | Prob. Success |       | Mean N | Prob. Stop Futility |      |      | Prob. Selected Best |      |      | Prob. Enroll 2500 |
|---------------|-------------------|---------------|-------|--------|---------------------|------|------|---------------------|------|------|-------------------|
|               |                   | Early         | Total |        | Short               | Int. | All  | 500                 | 1000 | 1500 |                   |
| Null          | -                 | 0.010         | 0.024 | 676    | 0.95                | 0.92 | 0.91 | 0.35                | 0.30 | 0.35 | 0.08              |
| Plateau       | All Work          | 0.75          | 0.92  | 1767   | 0.12                | 0.06 | 0.04 | 0.04                | 0.50 | 0.46 | 0.21              |
|               | Not Short         | 0.66          | 0.87  | 1822   | 0.86                | 0.15 | 0.09 | 0.06                | 0.44 | 0.49 | 0.26              |
| One Good      | All Work          | 0.67          | 0.86  | 1729   | 0.28                | 0.15 | 0.11 | 0.03                | 0.03 | 0.95 | 0.23              |
|               | Not Short         | 0.56          | 0.78  | 1725   | 0.83                | 0.28 | 0.19 | 0.06                | 0.04 | 0.90 | 0.26              |
| Linear        | All Work          | 0.64          | 0.84  | 1776   | 0.20                | 0.12 | 0.10 | 0.04                | 0.10 | 0.86 | 0.26              |
|               | Not Short         | 0.51          | 0.77  | 1782   | 0.82                | 0.24 | 0.17 | 0.07                | 0.14 | 0.79 | 0.31              |

# Reporting checklist for protocol of a clinical trial.

Based on the SPIRIT guidelines.

## Instructions to authors

Complete this checklist by entering the page numbers from your manuscript where readers will find each of the items listed below.

Your article may not currently address all the items on the checklist. Please modify your text to include the missing information. If you are certain that an item does not apply, please write "n/a" and provide a short explanation.

Upload your completed checklist as an extra file when you submit to a journal.

In your methods section, say that you used the SPIRIT reporting guidelines, and cite them as:

Chan A-W, Tetzlaff JM, Altman DG, Laupacis A, Gøtzsche PC, Krleža-Jerić K, Hróbjartsson A, Mann H, Dickersin K, Berlin J, Doré C, Parulekar W, Summerskill W, Groves T, Schulz K, Sox H, Rockhold FW, Rennie D, Moher D. SPIRIT 2013 Statement: Defining standard protocol items for clinical trials. *Ann Intern Med.* 2013;158(3):200-207

|                                   |                     | Reporting Item                                                                                               | Page Number |
|-----------------------------------|---------------------|--------------------------------------------------------------------------------------------------------------|-------------|
| <b>Administrative information</b> |                     |                                                                                                              |             |
| Title                             | <a href="#">#1</a>  | Descriptive title identifying the study design, population, interventions, and, if applicable, trial acronym | 1           |
| Trial registration                | <a href="#">#2a</a> | Trial identifier and registry name. If not yet registered, name of intended registry                         | 3           |
| Trial registration: data set      | <a href="#">#2b</a> | All items from the World Health Organization Trial Registration Data Set                                     | 3           |
| Protocol version                  | <a href="#">#3</a>  | Date and version identifier                                                                                  | 15          |
| Funding                           | <a href="#">#4</a>  | Sources and types of financial, material, and other support                                                  | 23          |

|    |                      |                     |                                                          |       |
|----|----------------------|---------------------|----------------------------------------------------------|-------|
| 1  | Roles and            | <a href="#">#5a</a> | Names, affiliations, and roles of protocol contributors  | 23    |
| 2  | responsibilities:    |                     |                                                          |       |
| 3  | contributorship      |                     |                                                          |       |
| 4  |                      |                     |                                                          |       |
| 5  |                      |                     |                                                          |       |
| 6  | Roles and            | <a href="#">#5b</a> | Name and contact information for the trial sponsor       | 23    |
| 7  | responsibilities:    |                     |                                                          |       |
| 8  | sponsor contact      |                     |                                                          |       |
| 9  | information          |                     |                                                          |       |
| 10 |                      |                     |                                                          |       |
| 11 |                      |                     |                                                          |       |
| 12 |                      |                     |                                                          |       |
| 13 | Roles and            | <a href="#">#5c</a> | Role of study sponsor and funders, if any, in study      | 23    |
| 14 | responsibilities:    |                     | design; collection, management, analysis, and            |       |
| 15 | sponsor and funder   |                     | interpretation of data; writing of the report; and the   |       |
| 16 |                      |                     | decision to submit the report for publication, including |       |
| 17 |                      |                     | whether they will have ultimate authority over any of    |       |
| 18 |                      |                     | these activities                                         |       |
| 19 |                      |                     |                                                          |       |
| 20 |                      |                     |                                                          |       |
| 21 |                      |                     |                                                          |       |
| 22 |                      |                     |                                                          |       |
| 23 | Roles and            | <a href="#">#5d</a> | Composition, roles, and responsibilities of the          | 16-17 |
| 24 | responsibilities:    |                     | coordinating centre, steering committee, endpoint        |       |
| 25 | committees           |                     | adjudication committee, data management team, and        |       |
| 26 |                      |                     | other individuals or groups overseeing the trial, if     |       |
| 27 |                      |                     | applicable (see Item 21a for data monitoring committee)  |       |
| 28 |                      |                     |                                                          |       |
| 29 |                      |                     |                                                          |       |
| 30 |                      |                     |                                                          |       |
| 31 | <b>Introduction</b>  |                     |                                                          |       |
| 32 |                      |                     |                                                          |       |
| 33 | Background and       | <a href="#">#6a</a> | Description of research question and justification for   | 5     |
| 34 | rationale            |                     | undertaking the trial, including summary of relevant     |       |
| 35 |                      |                     | studies (published and unpublished) examining benefits   |       |
| 36 |                      |                     | and harms for each intervention                          |       |
| 37 |                      |                     |                                                          |       |
| 38 |                      |                     |                                                          |       |
| 39 |                      |                     |                                                          |       |
| 40 | Background and       | <a href="#">#6b</a> | Explanation for choice of comparators                    | 5     |
| 41 | rationale: choice of |                     |                                                          |       |
| 42 | comparators          |                     |                                                          |       |
| 43 |                      |                     |                                                          |       |
| 44 |                      |                     |                                                          |       |
| 45 | Objectives           | <a href="#">#7</a>  | Specific objectives or hypotheses                        | 5     |
| 46 |                      |                     |                                                          |       |
| 47 |                      |                     |                                                          |       |
| 48 | Trial design         | <a href="#">#8</a>  | Description of trial design including type of trial (eg, | 5     |
| 49 |                      |                     | parallel group, crossover, factorial, single group),     |       |
| 50 |                      |                     | allocation ratio, and framework (eg, superiority,        |       |
| 51 |                      |                     | equivalence, non-inferiority, exploratory)               |       |
| 52 |                      |                     |                                                          |       |
| 53 |                      |                     |                                                          |       |
| 54 |                      |                     |                                                          |       |

**Methods:**  
**Participants,**



## interventions, and outcomes

|    |                                    |                      |                                                                                                                                                                                                                                                                                                                                                                                |
|----|------------------------------------|----------------------|--------------------------------------------------------------------------------------------------------------------------------------------------------------------------------------------------------------------------------------------------------------------------------------------------------------------------------------------------------------------------------|
| 1  |                                    |                      |                                                                                                                                                                                                                                                                                                                                                                                |
| 2  |                                    |                      |                                                                                                                                                                                                                                                                                                                                                                                |
| 3  |                                    |                      |                                                                                                                                                                                                                                                                                                                                                                                |
| 4  | Study setting                      | <a href="#">#9</a>   | Description of study settings (eg, community clinic, academic hospital) and list of countries where data will be collected. Reference to where list of study sites can be obtained                                                                                                                                                                                             |
| 5  |                                    |                      | 9                                                                                                                                                                                                                                                                                                                                                                              |
| 6  |                                    |                      |                                                                                                                                                                                                                                                                                                                                                                                |
| 7  |                                    |                      |                                                                                                                                                                                                                                                                                                                                                                                |
| 8  |                                    |                      |                                                                                                                                                                                                                                                                                                                                                                                |
| 9  |                                    |                      |                                                                                                                                                                                                                                                                                                                                                                                |
| 10 |                                    |                      |                                                                                                                                                                                                                                                                                                                                                                                |
| 11 | Eligibility criteria               | <a href="#">#10</a>  | Inclusion and exclusion criteria for participants. If applicable, eligibility criteria for study centres and individuals who will perform the interventions (eg, surgeons, psychotherapists)                                                                                                                                                                                   |
| 12 |                                    |                      | 10, 29                                                                                                                                                                                                                                                                                                                                                                         |
| 13 |                                    |                      |                                                                                                                                                                                                                                                                                                                                                                                |
| 14 |                                    |                      |                                                                                                                                                                                                                                                                                                                                                                                |
| 15 |                                    |                      |                                                                                                                                                                                                                                                                                                                                                                                |
| 16 |                                    |                      |                                                                                                                                                                                                                                                                                                                                                                                |
| 17 |                                    |                      |                                                                                                                                                                                                                                                                                                                                                                                |
| 18 | Interventions:<br>description      | <a href="#">#11a</a> | Interventions for each group with sufficient detail to allow replication, including how and when they will be administered                                                                                                                                                                                                                                                     |
| 19 |                                    |                      | 12-13                                                                                                                                                                                                                                                                                                                                                                          |
| 20 |                                    |                      |                                                                                                                                                                                                                                                                                                                                                                                |
| 21 |                                    |                      |                                                                                                                                                                                                                                                                                                                                                                                |
| 22 |                                    |                      |                                                                                                                                                                                                                                                                                                                                                                                |
| 23 | Interventions:<br>modifications    | <a href="#">#11b</a> | Criteria for discontinuing or modifying allocated interventions for a given trial participant (eg, drug dose change in response to harms, participant request, or improving / worsening disease)                                                                                                                                                                               |
| 24 |                                    |                      | 10                                                                                                                                                                                                                                                                                                                                                                             |
| 25 |                                    |                      |                                                                                                                                                                                                                                                                                                                                                                                |
| 26 |                                    |                      |                                                                                                                                                                                                                                                                                                                                                                                |
| 27 |                                    |                      |                                                                                                                                                                                                                                                                                                                                                                                |
| 28 |                                    |                      |                                                                                                                                                                                                                                                                                                                                                                                |
| 29 |                                    |                      |                                                                                                                                                                                                                                                                                                                                                                                |
| 30 | Interventions:<br>adherence        | <a href="#">#11c</a> | Strategies to improve adherence to intervention protocols, and any procedures for monitoring adherence (eg, drug tablet return; laboratory tests)                                                                                                                                                                                                                              |
| 31 |                                    |                      | 10                                                                                                                                                                                                                                                                                                                                                                             |
| 32 |                                    |                      |                                                                                                                                                                                                                                                                                                                                                                                |
| 33 |                                    |                      |                                                                                                                                                                                                                                                                                                                                                                                |
| 34 |                                    |                      |                                                                                                                                                                                                                                                                                                                                                                                |
| 35 | Interventions:<br>concomitant care | <a href="#">#11d</a> | Relevant concomitant care and interventions that are permitted or prohibited during the trial                                                                                                                                                                                                                                                                                  |
| 36 |                                    |                      | 7-8                                                                                                                                                                                                                                                                                                                                                                            |
| 37 |                                    |                      |                                                                                                                                                                                                                                                                                                                                                                                |
| 38 |                                    |                      |                                                                                                                                                                                                                                                                                                                                                                                |
| 39 | Outcomes                           | <a href="#">#12</a>  | Primary, secondary, and other outcomes, including the specific measurement variable (eg, systolic blood pressure), analysis metric (eg, change from baseline, final value, time to event), method of aggregation (eg, median, proportion), and time point for each outcome. Explanation of the clinical relevance of chosen efficacy and harm outcomes is strongly recommended |
| 40 |                                    |                      | 13-15,<br>16-17,<br>30                                                                                                                                                                                                                                                                                                                                                         |
| 41 |                                    |                      |                                                                                                                                                                                                                                                                                                                                                                                |
| 42 |                                    |                      |                                                                                                                                                                                                                                                                                                                                                                                |
| 43 |                                    |                      |                                                                                                                                                                                                                                                                                                                                                                                |
| 44 |                                    |                      |                                                                                                                                                                                                                                                                                                                                                                                |
| 45 |                                    |                      |                                                                                                                                                                                                                                                                                                                                                                                |
| 46 |                                    |                      |                                                                                                                                                                                                                                                                                                                                                                                |
| 47 |                                    |                      |                                                                                                                                                                                                                                                                                                                                                                                |
| 48 |                                    |                      |                                                                                                                                                                                                                                                                                                                                                                                |
| 49 |                                    |                      |                                                                                                                                                                                                                                                                                                                                                                                |
| 50 | Participant timeline               | <a href="#">#13</a>  | Time schedule of enrolment, interventions (including any run-ins and washouts), assessments, and visits for participants. A schematic diagram is highly recommended (see Figure)                                                                                                                                                                                               |
| 51 |                                    |                      | see<br>figure 4                                                                                                                                                                                                                                                                                                                                                                |
| 52 |                                    |                      |                                                                                                                                                                                                                                                                                                                                                                                |
| 53 |                                    |                      |                                                                                                                                                                                                                                                                                                                                                                                |
| 54 |                                    |                      |                                                                                                                                                                                                                                                                                                                                                                                |
| 55 |                                    |                      |                                                                                                                                                                                                                                                                                                                                                                                |
| 56 |                                    |                      |                                                                                                                                                                                                                                                                                                                                                                                |
| 57 | Sample size                        | <a href="#">#14</a>  | Estimated number of participants needed to achieve study objectives and how it was determined, including                                                                                                                                                                                                                                                                       |
| 58 |                                    |                      | 15-16                                                                                                                                                                                                                                                                                                                                                                          |
| 59 |                                    |                      |                                                                                                                                                                                                                                                                                                                                                                                |
| 60 |                                    |                      |                                                                                                                                                                                                                                                                                                                                                                                |

clinical and statistical assumptions supporting any sample size calculations

Recruitment [#15](#) Strategies for achieving adequate participant enrolment to reach target sample size 9-12

## Methods:

### Assignment of interventions (for controlled trials)

Allocation: sequence generation [#16a](#) Method of generating the allocation sequence (eg, computer-generated random numbers), and list of any factors for stratification. To reduce predictability of a random sequence, details of any planned restriction (eg, blocking) should be provided in a separate document that is unavailable to those who enrol participants or assign interventions 16

Allocation concealment mechanism [#16b](#) Mechanism of implementing the allocation sequence (eg, central telephone; sequentially numbered, opaque, sealed envelopes), describing any steps to conceal the sequence until interventions are assigned 9-10

Allocation: implementation [#16c](#) Who will generate the allocation sequence, who will enrol participants, and who will assign participants to interventions 9-11

Blinding (masking) [#17a](#) Who will be blinded after assignment to interventions (eg, trial participants, care providers, outcome assessors, data analysts), and how 8

Blinding (masking): emergency unblinding [#17b](#) If blinded, circumstances under which unblinding is permissible, and procedure for revealing a participant's allocated intervention during the trial 17-18

### Methods: Data collection, management, and analysis

Data collection plan [#18a](#) Plans for assessment and collection of outcome, baseline, and other trial data, including any related processes to promote data quality (eg, duplicate 9-10

measurements, training of assessors) and a description of study instruments (eg, questionnaires, laboratory tests) along with their reliability and validity, if known. Reference to where data collection forms can be found, if not in the protocol

|    |                            |                      |                                                             |
|----|----------------------------|----------------------|-------------------------------------------------------------|
| 1  |                            |                      |                                                             |
| 2  |                            |                      |                                                             |
| 3  |                            |                      |                                                             |
| 4  |                            |                      |                                                             |
| 5  |                            |                      |                                                             |
| 6  |                            |                      |                                                             |
| 7  |                            |                      |                                                             |
| 8  |                            |                      |                                                             |
| 9  | Data collection plan:      | <a href="#">#18b</a> | Plans to promote participant retention and complete         |
| 10 | retention                  |                      | follow-up, including list of any outcome data to be         |
| 11 |                            |                      | collected for participants who discontinue or deviate       |
| 12 |                            |                      | from intervention protocols                                 |
| 13 |                            |                      |                                                             |
| 14 |                            |                      |                                                             |
| 15 | Data management            | <a href="#">#19</a>  | Plans for data entry, coding, security, and storage,        |
| 16 |                            |                      | including any related processes to promote data quality     |
| 17 |                            |                      | (eg, double data entry; range checks for data values).      |
| 18 |                            |                      | Reference to where details of data management               |
| 19 |                            |                      | procedures can be found, if not in the protocol             |
| 20 |                            |                      |                                                             |
| 21 |                            |                      |                                                             |
| 22 |                            |                      |                                                             |
| 23 | Statistics: outcomes       | <a href="#">#20a</a> | Statistical methods for analysing primary and secondary     |
| 24 |                            |                      | outcomes. Reference to where other details of the           |
| 25 |                            |                      | statistical analysis plan can be found, if not in the       |
| 26 |                            |                      | protocol                                                    |
| 27 |                            |                      |                                                             |
| 28 |                            |                      |                                                             |
| 29 |                            |                      |                                                             |
| 30 | Statistics: additional     | <a href="#">#20b</a> | Methods for any additional analyses (eg, subgroup and       |
| 31 | analyses                   |                      | adjusted analyses)                                          |
| 32 |                            |                      |                                                             |
| 33 |                            |                      |                                                             |
| 34 | Statistics: analysis       | <a href="#">#20c</a> | Definition of analysis population relating to protocol non- |
| 35 | population and             |                      | adherence (eg, as randomised analysis), and any             |
| 36 | missing data               |                      | statistical methods to handle missing data (eg, multiple    |
| 37 |                            |                      | imputation)                                                 |
| 38 |                            |                      |                                                             |
| 39 |                            |                      |                                                             |
| 40 |                            |                      |                                                             |
| 41 | <b>Methods: Monitoring</b> |                      |                                                             |
| 42 |                            |                      |                                                             |
| 43 | Data monitoring:           | <a href="#">#21a</a> | Composition of data monitoring committee (DMC);             |
| 44 | formal committee           |                      | summary of its role and reporting structure; statement of   |
| 45 |                            |                      | whether it is independent from the sponsor and              |
| 46 |                            |                      | competing interests; and reference to where further         |
| 47 |                            |                      | details about its charter can be found, if not in the       |
| 48 |                            |                      | protocol. Alternatively, an explanation of why a DMC is     |
| 49 |                            |                      | not needed                                                  |
| 50 |                            |                      |                                                             |
| 51 |                            |                      |                                                             |
| 52 |                            |                      |                                                             |
| 53 |                            |                      |                                                             |
| 54 | Data monitoring:           | <a href="#">#21b</a> | Description of any interim analyses and stopping            |
| 55 | interim analysis           |                      | guidelines, including who will have access to these         |
| 56 |                            |                      |                                                             |
| 57 |                            |                      |                                                             |
| 58 |                            |                      |                                                             |
| 59 |                            |                      |                                                             |
| 60 |                            |                      |                                                             |

interim results and make the final decision to terminate the trial

|    |                                      |                      |                                                                                                                                                                                                                                    |
|----|--------------------------------------|----------------------|------------------------------------------------------------------------------------------------------------------------------------------------------------------------------------------------------------------------------------|
| 1  |                                      |                      |                                                                                                                                                                                                                                    |
| 2  |                                      |                      |                                                                                                                                                                                                                                    |
| 3  |                                      |                      |                                                                                                                                                                                                                                    |
| 4  | Harms                                | <a href="#">#22</a>  | Plans for collecting, assessing, reporting, and managing solicited and spontaneously reported adverse events and other unintended effects of trial interventions or trial conduct                                                  |
| 5  |                                      |                      | 2, 7                                                                                                                                                                                                                               |
| 6  |                                      |                      |                                                                                                                                                                                                                                    |
| 7  |                                      |                      |                                                                                                                                                                                                                                    |
| 8  |                                      |                      |                                                                                                                                                                                                                                    |
| 9  |                                      |                      |                                                                                                                                                                                                                                    |
| 10 |                                      |                      |                                                                                                                                                                                                                                    |
| 11 | Auditing                             | <a href="#">#23</a>  | Frequency and procedures for auditing trial conduct, if any, and whether the process will be independent from investigators and the sponsor                                                                                        |
| 12 |                                      |                      | 16, 27-                                                                                                                                                                                                                            |
| 13 |                                      |                      | 28                                                                                                                                                                                                                                 |
| 14 |                                      |                      |                                                                                                                                                                                                                                    |
| 15 |                                      |                      |                                                                                                                                                                                                                                    |
| 16 | <b>Ethics and dissemination</b>      |                      |                                                                                                                                                                                                                                    |
| 17 |                                      |                      |                                                                                                                                                                                                                                    |
| 18 |                                      |                      |                                                                                                                                                                                                                                    |
| 19 |                                      |                      |                                                                                                                                                                                                                                    |
| 20 | Research ethics approval             | <a href="#">#24</a>  | Plans for seeking research ethics committee / institutional review board (REC / IRB) approval                                                                                                                                      |
| 21 |                                      |                      | 17                                                                                                                                                                                                                                 |
| 22 |                                      |                      |                                                                                                                                                                                                                                    |
| 23 |                                      |                      |                                                                                                                                                                                                                                    |
| 24 | Protocol amendments                  | <a href="#">#25</a>  | Plans for communicating important protocol modifications (eg, changes to eligibility criteria, outcomes, analyses) to relevant parties (eg, investigators, REC / IRBs, trial participants, trial registries, journals, regulators) |
| 25 |                                      |                      | 17-18                                                                                                                                                                                                                              |
| 26 |                                      |                      |                                                                                                                                                                                                                                    |
| 27 |                                      |                      |                                                                                                                                                                                                                                    |
| 28 |                                      |                      |                                                                                                                                                                                                                                    |
| 29 |                                      |                      |                                                                                                                                                                                                                                    |
| 30 |                                      |                      |                                                                                                                                                                                                                                    |
| 31 |                                      |                      |                                                                                                                                                                                                                                    |
| 32 | Consent or assent                    | <a href="#">#26a</a> | Who will obtain informed consent or assent from potential trial participants or authorised surrogates, and how (see Item 32)                                                                                                       |
| 33 |                                      |                      | 10                                                                                                                                                                                                                                 |
| 34 |                                      |                      |                                                                                                                                                                                                                                    |
| 35 |                                      |                      |                                                                                                                                                                                                                                    |
| 36 |                                      |                      |                                                                                                                                                                                                                                    |
| 37 |                                      |                      |                                                                                                                                                                                                                                    |
| 38 | Consent or assent: ancillary studies | <a href="#">#26b</a> | Additional consent provisions for collection and use of participant data and biological specimens in ancillary studies, if applicable                                                                                              |
| 39 |                                      |                      | 14-15                                                                                                                                                                                                                              |
| 40 |                                      |                      |                                                                                                                                                                                                                                    |
| 41 |                                      |                      |                                                                                                                                                                                                                                    |
| 42 |                                      |                      |                                                                                                                                                                                                                                    |
| 43 | Confidentiality                      | <a href="#">#27</a>  | How personal information about potential and enrolled participants will be collected, shared, and maintained in order to protect confidentiality before, during, and after the trial                                               |
| 44 |                                      |                      | 9-10                                                                                                                                                                                                                               |
| 45 |                                      |                      |                                                                                                                                                                                                                                    |
| 46 |                                      |                      |                                                                                                                                                                                                                                    |
| 47 |                                      |                      |                                                                                                                                                                                                                                    |
| 48 |                                      |                      |                                                                                                                                                                                                                                    |
| 49 | Declaration of interests             | <a href="#">#28</a>  | Financial and other competing interests for principal investigators for the overall trial and each study site                                                                                                                      |
| 50 |                                      |                      | 24                                                                                                                                                                                                                                 |
| 51 |                                      |                      |                                                                                                                                                                                                                                    |
| 52 |                                      |                      |                                                                                                                                                                                                                                    |
| 53 | Data access                          | <a href="#">#29</a>  | Statement of who will have access to the final trial dataset, and disclosure of contractual agreements that limit such access for investigators                                                                                    |
| 54 |                                      |                      | 18, 24                                                                                                                                                                                                                             |
| 55 |                                      |                      |                                                                                                                                                                                                                                    |
| 56 |                                      |                      |                                                                                                                                                                                                                                    |
| 57 |                                      |                      |                                                                                                                                                                                                                                    |
| 58 |                                      |                      |                                                                                                                                                                                                                                    |
| 59 |                                      |                      |                                                                                                                                                                                                                                    |
| 60 |                                      |                      |                                                                                                                                                                                                                                    |

|    |                          |                      |                                                               |       |
|----|--------------------------|----------------------|---------------------------------------------------------------|-------|
| 1  | Ancillary and post trial | <a href="#">#30</a>  | Provisions, if any, for ancillary and post-trial care, and    | n/a   |
| 2  | care                     |                      | for compensation to those who suffer harm from trial          |       |
| 3  |                          |                      | participation                                                 |       |
| 4  |                          |                      |                                                               |       |
| 5  |                          |                      |                                                               |       |
| 6  | Dissemination policy:    | <a href="#">#31a</a> | Plans for investigators and sponsor to communicate trial      | 18    |
| 7  | trial results            |                      | results to participants, healthcare professionals, the        |       |
| 8  |                          |                      | public, and other relevant groups (eg, via publication,       |       |
| 9  |                          |                      | reporting in results databases, or other data sharing         |       |
| 10 |                          |                      | arrangements), including any publication restrictions         |       |
| 11 |                          |                      |                                                               |       |
| 12 |                          |                      |                                                               |       |
| 13 |                          |                      |                                                               |       |
| 14 | Dissemination policy:    | <a href="#">#31b</a> | Authorship eligibility guidelines and any intended use of     | 18    |
| 15 | authorship               |                      | professional writers                                          |       |
| 16 |                          |                      |                                                               |       |
| 17 |                          |                      |                                                               |       |
| 18 | Dissemination policy:    | <a href="#">#31c</a> | Plans, if any, for granting public access to the full         | 15    |
| 19 | reproducible research    |                      | protocol, participant-level dataset, and statistical code     |       |
| 20 |                          |                      |                                                               |       |
| 21 |                          |                      |                                                               |       |
| 22 | <b>Appendices</b>        |                      |                                                               |       |
| 23 |                          |                      |                                                               |       |
| 24 | Informed consent         | <a href="#">#32</a>  | Model consent form and other related documentation            | 15    |
| 25 | materials                |                      | given to participants and authorised surrogates               |       |
| 26 |                          |                      |                                                               |       |
| 27 |                          |                      |                                                               |       |
| 28 | Biological specimens     | <a href="#">#33</a>  | Plans for collection, laboratory evaluation, and storage      | 14-15 |
| 29 |                          |                      | of biological specimens for genetic or molecular analysis     |       |
| 30 |                          |                      | in the current trial and for future use in ancillary studies, |       |
| 31 |                          |                      | if applicable                                                 |       |
| 32 |                          |                      |                                                               |       |
| 33 |                          |                      |                                                               |       |
| 34 |                          |                      |                                                               |       |

## Notes:

- 35
- 36
- 37
- 38 • 12: 13-15, 16-17, 30
- 39
- 40 • 13: see figure 4
- 41
- 42 • 20b: 15-17, table 2 The SPIRIT checklist is distributed under the terms of the Creative Commons
- 43 Attribution License CC-BY-ND 3.0. This checklist was completed on 08. February 2020 using
- 44 <https://www.goodreports.org/>, a tool made by the [EQUATOR Network](#) in collaboration with
- 45 [Penelope.ai](#)
- 46
- 47
- 48
- 49
- 50
- 51
- 52
- 53
- 54
- 55
- 56
- 57
- 58
- 59
- 60

# BMJ Open

## Strategies to Promote Resiliency (SPRY): A Randomized Embedded Multifactorial Adaptative Platform (REMAP) Clinical Trial Protocol to Study Interventions to Improve Recovery after Surgery in High Risk Patients

|                                 |                                                                                                                                                                                                                                                                                                                                                                                                                                                                                                                                                                                                                                                                                                                                                                                                                                                                                                                                                                                                                                                                                                                                                                                                                                                                  |
|---------------------------------|------------------------------------------------------------------------------------------------------------------------------------------------------------------------------------------------------------------------------------------------------------------------------------------------------------------------------------------------------------------------------------------------------------------------------------------------------------------------------------------------------------------------------------------------------------------------------------------------------------------------------------------------------------------------------------------------------------------------------------------------------------------------------------------------------------------------------------------------------------------------------------------------------------------------------------------------------------------------------------------------------------------------------------------------------------------------------------------------------------------------------------------------------------------------------------------------------------------------------------------------------------------|
| Journal:                        | <i>BMJ Open</i>                                                                                                                                                                                                                                                                                                                                                                                                                                                                                                                                                                                                                                                                                                                                                                                                                                                                                                                                                                                                                                                                                                                                                                                                                                                  |
| Manuscript ID                   | bmjopen-2020-037690.R1                                                                                                                                                                                                                                                                                                                                                                                                                                                                                                                                                                                                                                                                                                                                                                                                                                                                                                                                                                                                                                                                                                                                                                                                                                           |
| Article Type:                   | Protocol                                                                                                                                                                                                                                                                                                                                                                                                                                                                                                                                                                                                                                                                                                                                                                                                                                                                                                                                                                                                                                                                                                                                                                                                                                                         |
| Date Submitted by the Author:   | 04-Aug-2020                                                                                                                                                                                                                                                                                                                                                                                                                                                                                                                                                                                                                                                                                                                                                                                                                                                                                                                                                                                                                                                                                                                                                                                                                                                      |
| Complete List of Authors:       | Reitz, Katherine; University of Pittsburgh Department of Surgery<br>Seymour, Christopher W. ; UPMC, Department of Critical Care Medicine<br>Vates, Jennifer; UPMC, Department of Critical Care Medicine<br>Quintana , Melanie; Berry Consultants Statistical Innovation<br>Viele, Kert; Berry Consultants Statistical Innovation<br>Detry, Michelle; Berry Consultants Statistical Innovation<br>Morowitz, Michael ; Children's Hospital of Pittsburgh of UPMC<br>Morris, Alison; UPMC, Department of Medicine<br>Methe, Barbara; UPMC, Department of Medicine<br>Kennedy, Jason; UPMC, Department of Critical Care Medicine<br>Zuckerbraun, Brian; University of Pittsburgh Department of Surgery,<br>girard, Timothy; UPMC, Department of Critical Care Medicine<br>Marroquin, Oscar; UPMC Health System, Clinical Analytics<br>Esper, Stephen; University of Pittsburgh, Anesthesiology<br>Holder-Murray, Jennifer; University of Pittsburgh Department of Surgery<br>Newman, Anne; University of Pittsburgh Department of Epidemiology,<br>Department of Epidemiology<br>Berry, Scott; Berry Consultants Statistical Innovation<br>Angus, Derek; UPMC, Department of Critical Care Medicine<br>Neal, Matthew; University of Pittsburgh Department of Surgery |
| <b>Primary Subject Heading</b>: | Surgery                                                                                                                                                                                                                                                                                                                                                                                                                                                                                                                                                                                                                                                                                                                                                                                                                                                                                                                                                                                                                                                                                                                                                                                                                                                          |
| Secondary Subject Heading:      | Geriatric medicine, Evidence based practice, Surgery                                                                                                                                                                                                                                                                                                                                                                                                                                                                                                                                                                                                                                                                                                                                                                                                                                                                                                                                                                                                                                                                                                                                                                                                             |
| Keywords:                       | Adult surgery < SURGERY, Clinical trials < THERAPEUTICS, SURGERY, Information management < BIOTECHNOLOGY & BIOINFORMATICS                                                                                                                                                                                                                                                                                                                                                                                                                                                                                                                                                                                                                                                                                                                                                                                                                                                                                                                                                                                                                                                                                                                                        |
|                                 |                                                                                                                                                                                                                                                                                                                                                                                                                                                                                                                                                                                                                                                                                                                                                                                                                                                                                                                                                                                                                                                                                                                                                                                                                                                                  |

SCHOLARONE™  
Manuscripts



I, the Submitting Author has the right to grant and does grant on behalf of all authors of the Work (as defined in the below author licence), an exclusive licence and/or a non-exclusive licence for contributions from authors who are: i) UK Crown employees; ii) where BMJ has agreed a CC-BY licence shall apply, and/or iii) in accordance with the terms applicable for US Federal Government officers or employees acting as part of their official duties; on a worldwide, perpetual, irrevocable, royalty-free basis to BMJ Publishing Group Ltd ("BMJ") its licensees and where the relevant Journal is co-owned by BMJ to the co-owners of the Journal, to publish the Work in this journal and any other BMJ products and to exploit all rights, as set out in our [licence](#).

The Submitting Author accepts and understands that any supply made under these terms is made by BMJ to the Submitting Author unless you are acting as an employee on behalf of your employer or a postgraduate student of an affiliated institution which is paying any applicable article publishing charge ("APC") for Open Access articles. Where the Submitting Author wishes to make the Work available on an Open Access basis (and intends to pay the relevant APC), the terms of reuse of such Open Access shall be governed by a Creative Commons licence – details of these licences and which [Creative Commons](#) licence will apply to this Work are set out in our licence referred to above.

Other than as permitted in any relevant BMJ Author's Self Archiving Policies, I confirm this Work has not been accepted for publication elsewhere, is not being considered for publication elsewhere and does not duplicate material already published. I confirm all authors consent to publication of this Work and authorise the granting of this licence.

# Strategies to Promote Resiliency (SPRY): A Randomized Embedded Multifactorial Adaptative Platform (REMAP) Clinical Trial Protocol to Study Interventions to Improve Recovery after Surgery in High Risk Patients

Katherine M Reitz MD<sup>1,2</sup>, Christopher W Seymour MD, MSc<sup>2,3,4</sup>, Jennifer R Vates MS-RA<sup>2,3</sup>, Melanie Quintana PhD<sup>5</sup>, Kert Viele PhD<sup>5</sup>, Michelle Detry PhD<sup>5</sup>, Michael J Morowitz MD<sup>1,6,7</sup>, Alison Morris MD, MS<sup>7,8</sup>, Barbara Methe PhD<sup>7,8</sup>, Jason Kennedy MS<sup>2,3</sup>, Brian S Zuckerbraun MD<sup>1</sup>, Timothy D Girard MD, MSCI<sup>2,3</sup>, Oscar C Marroquin MD<sup>9</sup>, Stephen A Esper MD, MBA<sup>10</sup>, Jennifer Holder-Murray MD<sup>1</sup>, Anne B Newman MD, MPH<sup>11</sup>, Scott Berry PhD<sup>5</sup>, Derek C Angus MD, MPH, FRCP<sup>2,3</sup>, Matthew D Neal MD<sup>1,3</sup>

1. Department of Surgery, University of Pittsburgh School of Medicine, Pittsburgh, PA
2. Clinical Research, Investigation and Systems Modeling of Acute Illness (CRISMA) Center, Pittsburgh, PA
3. Department of Critical Care Medicine, University of Pittsburgh School of Medicine, Pittsburgh, PA
4. Department of Emergency Medicine, University of Pittsburgh School of Medicine, Pittsburgh, PA
5. Berry Consultants - Statistical Innovation, Austin, TX
6. Pediatric General and Thoracic Surgery, UPMC Children's Hospital of Pittsburgh, Pittsburgh, PA
7. Center for Medicine and the Microbiome, University of Pittsburgh School of Medicine, Pittsburgh, PA
8. Department of Medicine, University of Pittsburgh School of Medicine, Pittsburgh, PA
9. Clinical Analytics, UPMC Health Services Division, Pittsburgh, PA
10. Department of Anesthesiology and Perioperative Medicine, University of Pittsburgh School of Medicine, Pittsburgh, PA
11. Department of Epidemiology, University of Pittsburgh, Graduate School of Public Health, Pittsburgh, PA

**Word Count** 3,365

**Figures** 4

**Tables** 3

## Current address and affiliation of corresponding author

Katherine M Reitz, MD  
Postdoctoral Scholar, Department of Surgery  
200 Lothrop St, F677 Presbyterian Hospital  
Pittsburgh, PA 15213  
Phone: (585) 802-1116, Fax: (412) 647-1448  
Email: reitzkm2@upmc.edu



## SPRY-Metformin Protocol

## Abstract

**Introduction:** As the population ages, there is interest in strategies to promote resiliency, especially for frail patients at risk of its complications. The physiologic stress of surgery in high risk individuals has been proposed both as an important cause of accelerated age-related decline in health and as a model testing the effectiveness of strategies to improve resiliency to age-related health decline. We describe a randomized, embedded, multifactorial, adaptative platform (REMAP) trial to investigate multiple perioperative interventions, the first of which is metformin and selected for its anti-inflammatory and anti-aging properties beyond its traditional blood glucose control features.

**Methods and analysis:** Within a multi-hospital, single healthcare system, the Core Protocol for Strategies to Promote Resiliency (SPRY) will be embedded within both the electronic health record (EHR) and healthcare culture generating a continuously self-learning healthcare system. Embedding reduces the administrative burden of a traditional trial while accessing and rapidly analyzing routine patientcare EHR data. SPRY-Metformin is a placebo-controlled trial, and the first SPRY domain evaluating the effectiveness of 3 metformin dosages across 3 preoperative durations within a heterogeneous set of major surgical procedures. The primary outcome is 90-day hospital free days. Bayesian posterior probabilities guide interim decision making with predefined rules to determine stopping for futility or superior dosing selection. Using response adaptative randomization, a maximum of 2,500 patients allows 77% to 92% power, detecting >15% primary outcome improvement. Secondary outcomes include mortality, readmission, and postoperative complications. A subset of patients will be selected for substudies evaluating the microbiome, cognition, postoperative delirium, and strength.

## SPRY-Metformin Protocol

**Ethics and dissemination:** The Core Protocol of SPRY REMAP and associated SPRY-Metformin Domain-specific Appendix have been ethically approved by the Institutional Review Board and are publicly registered. Results will be publicly available to healthcare providers, patients, and trial participants following achieving predetermined platform conclusions.

**ClinicalTrials.gov:** NCT03861767

**Word Count:** 298/300

For peer review only

### Strengths and Limitations

- The SPRY Core Protocol creates standardized trial elements shared multiple concurrent and sequential perioperative investigations, including SPRY-Metformin, preventing the continuous development and then dismantling of the expensive and complex clinical trial infrastructure.
- Digital trial embedding minimizes the work required by research staff to screen, randomize, and safely monitor patients within the perioperative period.
- The Bayesian analysis plan allows for borrowing of information on the treatment effect across multiple doses and durations of metformin to efficiency inform the research questions.
- Outcome data is automatically abstracted and supplemented by in-person inquiry, but may be limited or incomplete in patients who receive postoperative care within the multi-hospital healthcare system.
-

### Keywords

Randomized embedded multifactorial adaptive platform, REMAP, metformin, 90-day hospital free days, perioperative optimization, aging, prehabilitation

For peer review only

## Introduction

By 2020, over 55 million Americans will be greater than 65 years of age [1]. The lifelong accumulation of stressors progressively leads to chronic disease and disability compromising homeostatic reserve. The complex interplay of cumulative medical, social, and functional generating these deficits, defined as frailty, are associated with but independent from age and leave individuals vulnerable to a physiologic insult further reducing resiliency [2,3]. In response, a broad range of multimodal therapies (e.g., smoking cessation, nutritional optimization, physical activity programs, etc.) are currently under investigation to both prevent and reduce the effects of aging on physiologic reserve [4]. However, as frailty is typically developed longitudinally, establishing treatment efficacy in clinical trials requires years to decades of outcome monitoring [5].

A lifetime of exposure to multiple, small stressors may cumulatively reduce reserve equal to that of few, severe stressors [6]. Elderly patients, at risk of frailty, undergo over one third of all surgical interventions and have an increased rate of postoperative morbidity and mortality for all levels of physiologic surgical stress [6–11]. According to the National Institute for Aging, the stress of a surgery is an “age-accelerating” cause of frailty [6], rapidly depleting resilience to secondary insults [12,13]. Therefore, a major surgical intervention is an efficient experimental model for evaluating novel strategies aimed at stabilizing, preventing, or reversing frailty [6].

Perioperative investigations strive to improve outcomes in an aged and at-risk population and also model loss of reserve or accelerated aging. We have therefore designed a randomized, embedded, multifactorial, adaptative platform (REMAP) [14] trial to evaluate the effectiveness of perioperative therapies within a multi-hospital single healthcare system: Strategies to Promote Resiliency (SPRY). Metformin, the most commonly prescribed non-insulin medication for those with diabetes [15–17], has pleiotropic anti-inflammatory properties, and potentially slows the process of aging [18,19]. Therefore, we report the first of many trial

## SPRY-Metformin Protocol

1  
2  
3 protocols evaluating perioperative therapies both concurrently and sequentially on this adaptive  
4 platform, SPRY-Metformin, randomizing patients to 3 dosages of metformin or placebo in  
5 parallel.  
6  
7  
8  
9  
10  
11  
12  
13  
14  
15  
16  
17  
18  
19  
20  
21  
22  
23  
24  
25  
26  
27  
28  
29  
30  
31  
32  
33  
34  
35  
36  
37  
38  
39  
40  
41  
42  
43  
44  
45  
46  
47  
48  
49  
50  
51  
52  
53  
54  
55  
56  
57  
58  
59  
60

For peer review only

## Methods and Analysis

Our protocol follows the SPIRIT guidelines which are individually addressed in **Appendix 1** [20]. The below content focuses on novel aspects of the SPRY Core Protocol and associated SPRY-Metformin Domain-specific Appendix.

### ***Aims***

The primary aim of SPRY is to establish the Core Protocol infrastructure for continuous and simultaneous adaptive analysis of multifactorial perioperative therapies (i.e., domains) evaluating their effect on resiliency to age-accelerating surgical stress in patients at risk for postoperative morbidity and mortality.

The primary aim of the SPRY-Metformin domain is to simultaneously establish the ideal duration and dose of perioperative metformin to determine its effectiveness as pharmacologic optimization across multiple surgical specialties.

Unified, the aims of the Core Protocol and all associated multifactorial Domain-specific Appendixes are to embed the study protocols both digitally within the electronic health record (EHR) and culturally among clinicians generating an efficient, cost-effective, patient centered and continuously self-learning healthcare system.

### ***Trial Design***

The design of the SPRY Core Protocol and associated Domain-Specific Appendixes align with the recommendations of the Adaptive Platform Trials Coalition [21] and SPIRIT guidelines [20]. Specifically, SPRY will recurrently assess multiple, Trial Steering Committee (TSC) approved, domains in multiple surgical strata and disease subtypes using response adaptive randomization and a comprehensive statistical analysis plan to create a self-learning health system.

## SPRY-Metformin Protocol

### *SPRY Core Protocol*

SPRY is the first Core Protocol outlining the embedding of a trial within the EHR and routine perioperative healthcare delivery for at-risk, aged adults. The Core Protocol creates standardized trial elements shared by all applied domains, preventing the continuous development and then dismantling of the expensive and complex clinical trial infrastructure [22]. As with other adaptive platform trials, SPRY will assess multiple domains simultaneously using Bayesian statistical analysis and response adaptive randomization evaluating the treatment effect in predefined strata (e.g., vascular, orthopedic, hepatobiliary surgical interventions) [23,24]. In the REMAP design, patients can be randomized to one of many treatments within one of many simultaneously deployed domains resulting in multiple possible experimental treatment combinations. The Core Protocol allows for aggregation of the treatment response across different simultaneously investigated domains and the multifactorial evaluation of synergistic or antagonistic combinations within each of the strata.

SPRY trial flow per the Consolidation Standard of Reporting Trials (CONSORT) guidelines are adapted from the traditional linear format into a concentric diagram, demonstrating the perpetual nature of the Core Protocol (**Figure 1A**).

We provided details herein on the first SPRY Core Protocol Domain (SPRY-Metformin) (**Appendix 2**). Other, new domains will be added to the Core Protocol as emerging therapies become available. The TSC will consider the scientific validity of each domain, safety of concurrent therapies, and current enrollment rates when deciding to introduce a new domain concurrently or following existing domains. A new domain is introduced as a Domain-specific Appendix to the SPRY Core Protocol. This Domain-specific Appendix will be generated outlining potential interactions between multiple domains within the primary statistical analysis of efficacy, if deemed clinically appropriate. If multiple domains have been introduced, response adaptive



## SPRY-Metformin Protocol

randomization will be based on best performing combinations of therapies within the multiple domains and incorporate potential interactions.

### *SPRY-Metformin Domain-Specific Appendix*

SPRY-Metformin is a multi-hospital, single healthcare system, placebo-controlled, adaptive, phase 3 clinical trial that is blinded at the level of the patient, clinician, research team, and data analyst. SPRY-Metformin is the first domain to be launched on the SPRY Core Protocol testing the effectiveness of metformin in improving perioperative outcomes (**Figure 1B**). Patients are screened and recruited from preoperative clinic through a custom application communicating with EHR data (**Figure 2**). Study drug is started following randomization and continued throughout the perioperative period through postoperative day (POD) 90 (**Figure 3**). All patients are prospectively monitored through POD 365 with both automated EHR data collection and longitudinal patient follow up (**Appendix 3**).

### *Patient and Public Involvement*

Patients were not invited to comment on the study design or result interpretation for the SPRY Core Protocol or SPRY-Metformin.

### *Trial Embedding*

The integration of this trial into the EHR and clinical workflow requires two distinct forms of embedding: digital and cultural.

#### *Digital Embedding*

We developed Java-based (Oracle Corporation, Redwood Shores, CA) custom software, the SPRY-Application, which interfaces with the research team and EHR data. The digital embedding of the SPRY-Application serves multiple purposes. First, protecting the privacy of

## SPRY-Metformin Protocol

1  
2  
3 trial patients. Second, automating patient screening, enrollment, and randomization while  
4  
5 synchronizing research activities within perioperative standard of care clinical encounters. Third,  
6  
7 accessing the robust EHR data generated as a part of routine patient care.  
8

9  
10 At UPMC, a two-factor authentication system safeguards all private patient information  
11  
12 accessed through a single Citrix Workspace (Fort Lauderdale, FL) in accordance with Health  
13  
14 Insurance Portability and Accountability Act. Like all protected data and programs within the  
15  
16 healthcare system, the SPRY-Application resides behind this institutional firewall. Here, the  
17  
18 SPRY-Application is distinct from, but communicates with EHR data. The SPRY-Application  
19  
20 accesses the clinical research data repository within UPMC Clinical Analytics and is managed  
21  
22 by Biostatistical and Data Management Core in the Department of Critical Care Medicine at  
23  
24 UPMC. The data repository abstracts structured, raw data from the inpatient (CERNER Co.,  
25  
26 Kansas City, MO) and outpatient (Epic Systems Co., Madison, WI) EHR and generates  
27  
28 accessible data tables. The data extraction process parallels the methodology used traditionally  
29  
30 for retrospective EHR data collection and research [25–27]; however, these data are updated in  
31  
32 real time.  
33

34  
35 Potential trial participant identification begins with the SPRY-Application screening. The  
36  
37 SPRY-Application reviews SPRY specific, EHR data tables for each patient with a scheduled  
38  
39 appointment at enrolling preoperative SPRY-Metformin clinics (**Figure 3**). The EHR of each  
40  
41 scheduled patient is reviewed, generating a list of patients meeting a subset of inclusion and  
42  
43 exclusion criteria. This list of potential SPRY-Metformin candidates is then automatically  
44  
45 distributed to the study team and clinicians via institutional email for review.  
46

47  
48 In preoperative clinics, patients are offered the opportunity to participate in SPRY-  
49  
50 Metformin. The SPRY-Application guides the clinician through the stepwise informed consent  
51  
52 process (**Appendix 4**). Then, pertinent clinical biorepository EHR data auto-populates screening  
53  
54 information within the SPRY-Application for review and confirmation with the patient (**Figure 4**).  
55  
56 Any identified discrepancies between patient report and the EHR auto-populated SPRY-  
57  
58  
59  
60

## SPRY-Metformin Protocol

Application data prompt the clinician to update the EHR (**Figure 1A**). This both minimizes trial data entry and maintains the accuracy of the EHR.

Patients meeting all inclusion and no exclusion criteria are allocated to a treatment regimen based upon the established randomization tables uploaded to the SPRY-Application. Automatically, the SPRY-Application then generates the study drug and laboratory prescription and synchronizes all research activities (e.g., blood and stool samples) within pertinent, scheduled perioperative standard of care clinical encounters. Throughout patient enrollment, the SPRY-Application monitors for biorepository updates to the Cerner Admission-Discharge-Transfer tables and informs the research team of hospital admissions and discharges for enrolled patients. Inevitable in-trial schedule changes can be manually updated within the SPRY-Application user interface and therefore adjusts the research activity timeline, updating research personnel, and distributing additional study drug, as needed, via the mail.

### *Cultural Embedding*

SPRY-Metformin is designed with the intent to rely heavily on bedside clinicians for many aspects of trial execution. Healthcare system staff within high volume surgical clinics are busy with existing patient care responsibilities. We have attempted to minimize the burden of research in two ways. First, whenever possible, the protocol is fused within existing care activities. Second, we focus on engaging, educating, and motivating the entire clinical team.

For example, as each new site is identified, prior to site initiation, the research team informs the clinical team about the potential benefits of a REMAP trial design and a self-learning healthcare system. Simultaneously, the clinical team educates the research team on their patients' experiences and the clinic or unit specific workflow. Both teams generate clinic or unit specific protocols and SPRY-Application user manuals.

### *Study Population*

## SPRY-Metformin Protocol

The evaluation of enrollment criteria for the study population occurs across two formats and at two levels. Initially, a subset of criteria is screened in a digital format by the SPRY-Application. Subsequently, in face-to-face clinic format the consenting clinician confirms all inclusion and exclusion criteria. As prompted by the SPRY-Application, any discrepancies found between the data within the SPRY-Application and the patients' reported health state are manually updated within the SPRY-Application and EHR (**Figure 4**).

At the first level, patients exposed to the stress of an elective surgical intervention are identified. At the second level, participants are evaluated against the inclusion and exclusion criteria of the SPRY-Metformin domain identifying patients who, i) can be safely exposed to metformin and ii) are at risk of decreased physiologic reserve (i.e., older age and/or medical comorbidity) conferring postoperative morbidity and mortality at all levels of surgical stress (**Table 1**) [3,10]. Patients randomized in SPRY-Metformin can also participate in either or both substudies (microbiome or motor) as well as additional future domains on the SPRY Core Protocol.

### ***SPRY-Metformin Intervention***

#### *Metformin Rationale*

We hypothesize that pharmacologic perioperative optimization will improve surgical outcomes for an aged, frail patient population. Metformin, the most commonly prescribed non-insulin medication for type 2 diabetics, is one such therapy [15–17]. In multiple studies, metformin has an excellent safety profile, is well tolerated, and consistently delays the aging process and minimizes deleterious cellular inflammation [5] through effects on cellular respiration [28], muscle function [29], and the microbiome [30]. Metformin advantageously modulates the body's response to physical stress through its systemic anti-inflammatory properties [31,32] and appear to be independent of blood glucose control [32].

## SPRY-Metformin Protocol

### *Study Drug*

Both the duration and dose of study drug exposure will be evaluated. Patients are stratified based upon the anticipated perioperative duration: short (7-28 days), intermediate (29-90 days), or long (91-180 days). Within each duration window, patients are randomized to one of three doses of metformin extended release 500, 1000, or 1500mg, or placebo. Study drug is initiated the day following randomization and continued through postoperative day 90 without planned interruption perioperatively (**Figure 2**).

### *EHR Embedded Safety Alerts*

Surgical stress can cause fluctuation in organ function perioperatively. As a part of routine clinical care, patients at the greatest risk of physiologic derailment and significant postoperative complications are admitted for postoperative monitoring. In real time, the SPRY-Application generates “pop-up” style inpatient EHR alerts prompting the bedside nurse to hold study drug administration in the setting of current (i.e., estimated glomerular filtration rate <45 or serum lactate  $\geq 4$ ) or potential future (i.e., ordered contrasted imaging studies) organ dysfunction (**Figure 2**). Simultaneously, the SPRY-Application generates an institutional email notifying the research team.

### *Endpoints*

The primary endpoint of SPRY Core Protocol hospital free days (HFD) up to 90 days [33–36]. This composite endpoint is an ordered categorical variable defined as the number of days from the day of surgery to the 90 thereafter, during which the patient is alive and free of hospitalization and was chosen for three reasons. First, this composite variable quantifies the care required for patients with reduced physiologic reserve with an increased risk of both specific postoperative complications (i.e., wound infections) and overall progression of frailty

## SPRY-Metformin Protocol

(i.e., progressive sarcopenia resulting in a fall and hip fracture) resulting in fewer HFD [10,37–41]. Second, HFD is weighted (i.e. -1) to address potential effects on mortality, independent of the cause and time of mortality within 90 days, throughout the 90-day postoperative period [33]. Third, time out of the hospital quantifies clinical outcomes and the cost of resource utilization, but reflects postoperative events important to patients and their families [42]. Therefore, HFD captures any treatment associated enhancements in resiliency across surgical strata and is applicable to SPRY-Metformin and any domain on the SPRY Core Protocol. The predefined and validated secondary clinical endpoints are listed in **Table 2** and **Table 3** [42–45].

### *Patient Sample Biorepository*

An additional long-term goal of SPRY-Metformin is to understand the molecular mechanisms by which metformin might attenuate the inflammatory response and improve outcomes after surgical stress.

### **Statistical Analysis**

The primary analysis plan for SPRY-Metformin includes a Bayesian ordinal logistic regression analysis of 90-day HFD to allow for borrowing of information on the treatment effect across different doses and durations of Metformin to maximally inform the research questions while minimizing the required patient sample size [46,47]. Complete documentation of the statistical analysis plan is including in the Statistical Analysis Appendix (**Appendix 2**).

### *Simulations and Sample Size Generation*

Clinical trial simulations are used to optimize clinical trial design (best thresholds for early success, dose dropping, and futility stopping), to determine the sample size needed within this trial to obtain at least 80% power for a clinically meaningful treatment effect and a one-sided 2.5% type I error under the null distributions, and to quantify additional operating characteristics

## SPRY-Metformin Protocol

1  
2  
3 of the SPRY-Metformin trial. Utilizing pertinent retrospective UPMC EHR data, virtual patient  
4 datasets were created based on the observed distributions of the primary endpoint, 90-day  
5 HFD, within each stratum. Clinical trial simulations randomized patients to study drug and  
6 numerous trials were virtually executed, including all interim analysis and randomization  
7 adaptations. For simulated patients randomized to placebo, we assumed the primary outcome  
8 to be distributed similar to the observed 90-day HFD distribution per surgical strata within the  
9 UPMC EHR data. For simulated patients randomized to metformin, the distributions of 90-day  
10 HFD within UPMC HER data per surgical strata were shifted towards higher values of 90-day  
11 HFD being more likely based on a common percent reduction in 90-day hospital days (90- [90-  
12 day HFD]). For examples of how the distributions were shifted see **Appendix 2, Figure 4.1** and  
13 **Table 4.2**. The minimum clinically meaningful effect size was assumed to be a common  
14 percent decrease of 15% in 90-day mean hospital days for the highest treatment dose. This was  
15 chosen because it is sensitive to absolute differences in hospital days and treatments may have  
16 a larger absolute benefit for those procedures that are expected to result in more hospital days  
17 (**Appendix 2, Table 4.2**) [34].

18  
19  
20  
21  
22  
23  
24  
25  
26  
27  
28  
29  
30  
31  
32  
33  
34  
35  
36  
37  
38  
39  
40  
41  
42  
43  
44  
45  
46  
47  
48  
49  
50  
51  
52  
53  
54  
55  
56  
57  
58  
59  
60

Trial behavior, such as power and type I error were summarized as the proportion of simulated trials that were successful under the alternative and null scenarios respectively. Patients will therefore be adaptively randomized to placebo or three doses of metformin, for a maximum sample size of 2,500 patients enrolled. The trial has at least 84% power to detect a treatment effect of at least a 15% reduction in mean hospital days for a minimum of one of the doses under the assumption that the dose has an equally effective percent reduction in mean hospital days across all three preoperative metformin durations. If a dose is not effective for the short preoperative duration, the trial has at least 77% power to detect a treatment effect of at least a 15% reduction in mean hospital days for at least one of the doses. Under the assumption that no doses are effective there is an overall one-sided type I error of 2.5%.

## SPRY-Metformin Protocol

The motor subgroup will enroll up to one third of SPRY-Metformin trial patients. The microbiome and muscle biopsy subgroups are exploratory pilot substudies with 1,000 and 200 patients to be enrolled.

### *Response Adaptive Randomization and Interim Analysis*

Initially, SPRY-Metformin will randomize a maximum of 2,000 patients. Within each of the 3 preoperative durations, patients will initially be randomized  $\sqrt{3}:1:1:1$  to placebo and the 3 doses of metformin. Interim analysis is completed each time 500 patients have been randomized across all preoperative durations and followed for 90 POD. At each interim analysis, the trial can be stopped early for demonstrating efficacy, response adaptive randomization will be adjusted to preferentially randomize patients to the best performing treatment group, or dose(s) can be dropped for futility.

### *Analysis Plan*

The primary analysis method of 90-day HFD within SPRY-Metformin is a Bayesian ordinal logistic regression model that accounts for differences in the expected 90-day HFD distribution depending on surgical strata and allows for borrowing of information across pre-op durations and doses of Metformin [47]. Within this model, the effect of each dose of metformin for each preoperative duration relative to placebo is characterized as a constant log-OR shift in the 90-day HFD distribution. The primary intention to treat analysis will include those who have been randomized. All missing data will be imputed based upon the median observed 90-day HFD value for each treatment arm and preoperative duration. Sensitivity analysis will explore a per protocol analysis and alternative imputation strategies that do not make missing at random assumptions. Exploratory analyses will investigate the heterogeneity of treatment effects across key patient subgroups including, patient age and frailty as well as operative stress and surgical strata.



## SPRY-Metformin Protocol

1  
2  
3 Superiority of a metformin dose to placebo within SPRY-Metformin is determined based  
4 on the posterior probability that the pooled log-OR effect of that dose across all enrolling  
5 preoperative durations relative to placebo is less than 0, indicating a shift in the 90-day HFD  
6 distribution towards more HFD under treatment compared to placebo. Success is declared at an  
7 interim or at the final analysis if the posterior probability of superiority for any dose of metformin  
8 is greater than the pre-defined interim-specific success threshold. The thresholds are based on  
9 an O'Brien Fleming spending function assuming a maximum sample size of 2,500 [48].  
10  
11  
12  
13  
14  
15  
16  
17

18 SPRY-Metformin secondary outcomes will be analyzed using regression models that  
19 account for expected differences in surgical strata of the patient.  
20  
21

22 Additional domains and additional interventions within domains will be added to the  
23 SPRY Core Protocol. Treatment effects and treatment-by-treatment interactions can be added  
24 for each additional perioperative therapy.  
25  
26  
27  
28  
29  
30

### Ethics and Dissemination

31  
32 Both the Core Protocol and SPRY-Metformin Domain-specific Appendix were  
33 independently approved at the University of Pittsburgh Institutional Review Board (IRB#  
34 18060039, 18060038) without a required Investigational New Drug exemption from the Food  
35 and Drug Administration. Three independent groups were established to provide oversight for  
36 SPRY-Metformin: TSC, Statistical Monitoring Committee (SMC), and DSMB. The details of the  
37 relationship between and responsibilities of these committees are discussed in detail in the  
38  
39  
40  
41  
42  
43  
44  
45 **Appendix 1** and summarized in **Figure 4**.  
46  
47  
48  
49

#### *Platform conclusion*

50  
51 In SPRY, a platform conclusion describes when a statistical trigger has been reached  
52 and, following evaluation by the DSMB and in conjunction with the TSC, a decision is made to  
53 conclude a domain or intervention within a domain for superiority, equivalence, or futility. Under  
54  
55  
56  
57  
58  
59

## SPRY-Metformin Protocol

1  
2  
3 all circumstances, a platform conclusion leads to implementation of the result within the REMAP  
4  
5 and under almost all circumstances a platform conclusion leads immediately to Public  
6  
7 Disclosure of the result by presentation and publication by the SPRY research team.  
8  
9  
10  
11  
12  
13  
14  
15  
16  
17  
18  
19  
20  
21  
22  
23  
24  
25  
26  
27  
28  
29  
30  
31  
32  
33  
34  
35  
36  
37  
38  
39  
40  
41  
42  
43  
44  
45  
46  
47  
48  
49  
50  
51  
52  
53  
54  
55  
56  
57  
58  
59  
60

For peer review only

## References

- 1 2017 National Population Projections Table. United States Census Bur. 2017.
- 2 Walston J, Hadley EC, Ferrucci L et al. Research agenda for frailty in older adults: toward a better understanding of physiology and etiology: summary from the American Geriatrics Society/National Institute on Aging Research Conference on Frailty in Older Adults. *J Am Geriatr Soc* 2006;**54**:991. doi:10.1111/j.1532-5415.2006.00745.x
- 3 Joseph B, Pandit V, Zangbar B, et al. Superiority of frailty over age in predicting outcomes among geriatric trauma patients: A prospective analysis. *JAMA Surg* 2014;**149**:766–72. doi:10.1001/jamasurg.2014.296
- 4 Fairhall N, Langron C, Sherrington C, et al. Treating frailty-a practical guide. *BMC Med* 2011;**9**:83. doi:10.1186/1741-7015-9-83
- 5 Barzilai N, Crandall JP, Kritchevsky SB, et al. Metformin as a Tool to Target Aging. *Cell Metab.* 2016;**23**:1060–5. doi:10.1016/j.cmet.2016.05.011
- 6 Robinson T, Walston J, Brummer N, et al. Frailty for Surgeons: Review of a National Institute on Aging Conference on Frailty for Specialists Thomas. *J Am Coll Surg* 2015;**221**:1083–92. doi:10.1016/j.jamcollsurg.2015.08.428.Frailty
- 7 The Department of Health and Human Services: Administration on Aging (AoA). Profile of Older Americans: 2015 Profile. Washington, DC: 2016.  
[https://www.giaging.org/documents/A\\_Profile\\_of\\_Older\\_Americans\\_\\_2016.pdf](https://www.giaging.org/documents/A_Profile_of_Older_Americans__2016.pdf)
- 8 Eaton MP, Osler TM, Li Y, et al. Hospital Readmission After Noncardiac Surgery. *JAMA Surg* 2014;**149**:439. doi:10.1001/jamasurg.2014.4
- 9 Hall DE, Arya S, Schmid KK, et al. Association of a frailty screening initiative with postoperative survival at 30, 180, and 365 days. *JAMA Surg* 2017;**152**:233–40. doi:10.1001/jamasurg.2016.4219
- 10 Shinall MC, Arya S, Youk A, et al. Association of Preoperative Patient Frailty and Operative Stress with Postoperative Mortality. *JAMA Surg* 2019;**152**:1–9.

## SPRY-Metformin Protocol

- 1  
2  
3 doi:10.1001/jamasurg.2019.4620  
4  
5 11 Shinall MC, Youk A, Massarweh NN, *et al.* Association of Preoperative Frailty and  
6 Operative Stress With Mortality After Elective vs Emergency Surgery. *JAMA Netw Open*  
7 2020;**3**:10–3. doi:10.1001/jamanetworkopen.2020.10358  
8  
9  
10  
11 12 Neupane I, Arora RC, Rudolph JL. Cardiac surgery as a stressor and the response of the  
13 vulnerable older adult. *Exp Gerontol* 2017;**87**:168–74. doi:10.1016/j.exger.2016.04.019  
14  
15  
16 13 Joseph B, Zangbar B, Pandit V, *et al.* Emergency General Surgery in the Elderly: Too Old  
17 or Too Frail? *J Am Coll Surg* 2016;**222**:805–13. doi:10.1016/j.jamcollsurg.2016.01.063  
18  
19  
20 14 Angus DC. Fusing Randomized Trials With Big Data The Key to Self-learning Health  
21 Care Systems? *JAMA* 2019;**314**.  
22  
23  
24 15 Flory J, Lipska K. Metformin in 2019. *JAMA* 2019;**321**:1926–7.  
25  
26 doi:10.1001/jama.2019.3805  
27  
28 16 Madsen KS, Kähler P, Kähler LKA, *et al.* Metformin and second-or third-generation  
29 sulphonylurea combination therapy for adults with type 2 diabetes mellitus. *Cochrane*  
30 *Database Syst Rev* 2019;**2019**. doi:10.1002/14651858.CD012368.pub2  
31  
32  
33  
34 17 Standard of Medical Care in Diabetes - 2019. 2019.  
35  
36  
37 18 Konopka AR, Miller BF. Taming expectations of metformin as a treatment to extend  
38 healthspan. *GeroScience* 2019;**41**:101–8. doi:10.1007/s11357-019-00057-3  
39  
40  
41 19 Hadley EC, Kuchel GA, Newman AB. Report: NIA Workshop on Measures of Physiologic  
42 Resiliencies in Human Aging. *Journals Gerontol - Ser A Biol Sci Med Sci* 2017;**72**:980–  
43 90. doi:10.1093/gerona/glx015  
44  
45  
46  
47 20 Chan A, Tetzlaff JM, Altman DG. SPIRIT 2013 Statement: Defining Standard Protocol  
48 Items for Clinical Trials. *Ann Intern Med* 2016;**158**:200–7. doi:10.7326/0003-4819-158-3-  
49 201302050-00583.Requests  
50  
51  
52  
53 21 The Adaptive Platform Trials Coalition. Adaptive platform trials: definition, design, conduct  
54 and reporting considerations. *Nat Rev Drug Discov* 2019.  
55  
56  
57  
58  
59

## SPRY-Metformin Protocol

- 1  
2  
3 22 Schultz A, Marsh JA, Saville BR, *et al.* Trial refresh: A case for an adaptive platform trial  
4 for pulmonary exacerbations of cystic fibrosis. *Front Pharmacol* 2019;**10**:1–8.  
5  
6 doi:10.3389/fphar.2019.00301  
7  
8  
9 23 Woodcock J, LaVange L. Master Protocols to Study Multiple Therapies, Multiple  
10 Diseases, or Both. *N Engl J Med* 2017;**377**. doi:10.1056/NEJMra1510062  
11  
12  
13 24 Berry SM, Berry DA. Accounting for multiplicities in assessing drug safety: A three-level  
14 hierarchical mixture model. *Biometrics* 2004;**60**:418–26. doi:10.1111/j.0006-  
15  
16 341X.2004.00186.x  
17  
18  
19 25 Milinovich A, Kattan MW. Extracting and utilizing electronic health data from Epic for  
20 research. *Ann Transl Med* 2018;**6**:42–42. doi:10.21037/atm.2018.01.13  
21  
22  
23 26 Reitz KM, Marroquin OC, Zenati MS, *et al.* Association between metformin exposure and  
24 postoperative outcomes in diabetic adults. *JAMA Surg* 2020.  
25  
26  
27 27 Singer M, Deutschman CS, Seymour CW, *et al.* The Third International Consensus  
28 Definitions for Sepsis and Septic Shock (Sepsis-3). *JAMA* 2016;**315**:801–10.  
29  
30  
31 doi:10.1001/jama.2016.0287  
32  
33  
34 28 Hou X, Song J, Li XN, *et al.* Metformin reduces intracellular reactive oxygen species  
35 levels by upregulating expression of the antioxidant thioredoxin via the AMPK-FOXO3  
36 pathway. *Biochem Biophys Res Commun* 2010;**396**:199–205.  
37  
38  
39 doi:10.1016/j.bbrc.2010.04.017  
40  
41  
42 29 Turban S, Stretton C, Drouin O, *et al.* Defining the contribution of AMP-activated protein  
43 kinase (AMPK) and protein kinase C (PKC) in regulation of glucose uptake by metformin  
44 in skeletal muscle cells. *J Biol Chem* 2012;**287**:20088–99. doi:10.1074/jbc.M111.330746  
45  
46  
47 30 Wu H, Esteve E, Tremaroli V, *et al.* Metformin alters the gut microbiome of individuals  
48 with treatment-naive type 2 diabetes, contributing to the therapeutic effects of the drug.  
49  
50  
51 *Nat Med* 2017;**23**:850–8. doi:10.1038/nm.4345  
52  
53  
54 31 Campbell JM, Bellman SM, Stephenson MD, *et al.* Metformin reduces all-cause mortality  
55  
56  
57  
58  
59  
60

## SPRY-Metformin Protocol

- 1  
2  
3 and diseases of ageing independent of its effect on diabetes control: A systematic review  
4 and meta-analysis. *Ageing Res Rev* 2017;**40**:31–44. doi:10.1016/j.arr.2017.08.003  
5  
6  
7 32 Cameron AR, Morrison VL, Levin D, *et al.* Anti-Inflammatory Effects of Metformin  
8 Irrespective of Diabetes Status. *Circ Res* 2016;**119**:652–65.  
9  
10 doi:10.1161/CIRCRESAHA.116.308445  
11  
12  
13 33 Lewis RJ, Angus DC, Laterre PF, *et al.* Rationale and design of an adaptive phase 2b/3  
14 clinical trial of selepressin for adults in septic shock: Selepressin evaluation programme  
15 for sepsis-induced shock - Adaptive clinical trial. *Ann Am Thorac Soc* 2018;**15**:250–7.  
16  
17 doi:10.1513/AnnalsATS.201708-669SD  
18  
19  
20  
21  
22 34 Ritch CR, Cookson MS, Chang SS, *et al.* Impact of Complications and hospital-free days  
23 on health related quality of life 1 year after radical cystectomy. *J Urol* 2014;**192**:1360–4.  
24  
25 doi:10.1016/j.juro.2014.06.004  
26  
27  
28 35 Bateni SB, Gingrich AA, Stewart SL, *et al.* Hospital utilization and disposition among  
29 patients with malignant bowel obstruction: A population-based comparison of surgical to  
30 medical management 11 Medical and Health Sciences 1117 Public Health and Health  
31 Services. *BMC Cancer* 2018;**18**:1–10. doi:10.1186/s12885-018-5108-9  
32  
33  
34  
35  
36  
37 36 Young P, Hodgson C, Dulhunty J, *et al.* End points for Phase II trials in intensive care :  
38 recommendations from the Australian and New Zealand Clinical Trials Group consensus  
39 panel meeting. *Crit Care Resusc* 2012;**14**:211–5.  
40  
41  
42  
43 37 Wahl TS, Graham LA, Hawn MT, *et al.* Association of the modified frailty index with 30-  
44 day surgical readmission. *JAMA Surg* 2017;**152**:749–57.  
45  
46 doi:10.1001/jamasurg.2017.1025  
47  
48  
49 38 Rothenberg KA, Stern JR, George EL, *et al.* Association of Frailty and Postoperative  
50 Complications With Unplanned Readmissions After Elective Outpatient Surgery. *JAMA*  
51 *Netw open* 2019;**2**:e194330. doi:10.1001/jamanetworkopen.2019.4330  
52  
53  
54  
55  
56 39 Davenport DL, Henderson WG, Khuri SF, *et al.* Preoperative risk factors and surgical  
57  
58  
59

## SPRY-Metformin Protocol

- 1  
2  
3 complexity are more predictive of costs than postoperative complications: A case study  
4 using the National Surgical Quality Improvement Program (NSQIP) database. *Ann Surg*  
5 2005;**242**:463–71. doi:10.1097/01.sla.0000183348.15117.ab  
6  
7  
8  
9  
40 Shah R, Attwood K, Arya S, *et al.* Association of frailty with failure to rescue after low-risk  
10 and high-risk inpatient surgery. *JAMA Surg* 2018;**153**. doi:10.1001/jamasurg.2018.0214  
11  
12  
13  
41 Fagenson AM, Powers BD, Zorbas KA, *et al.* Frailty Predicts Morbidity and Mortality After  
14 Laparoscopic Cholecystectomy for Acute Cholecystitis: An ACS-NSQIP Cohort Analysis.  
15  
16  
17  
18  
19  
42 Jammer I, Wickboldt N, Sander M, *et al.* Standards for definitions and use of outcome  
20 measures for clinical effectiveness research in perioperative medicine: European  
21  
22  
23  
24  
25  
26  
27  
28  
29  
30  
43 Nsqip ACS. ACS NSQIP Variables & Definitions - Chapter 4. *ACS NSQIP Oper Man*  
31  
32  
33  
34  
44 DeBord J, Novitsky Y, Fitzgibbons R, *et al.* SSI , SSO , SSE , SSOPI: the elusive  
35  
36  
37  
38  
45 Schneider EB, Gani F, Pawlik TM, *et al.* Understanding Variation in 30-Day Surgical  
39  
40  
41  
42  
43  
44  
45  
46  
47  
48  
49  
50  
51  
52  
53  
54  
55  
56  
57  
58  
59  
60  
48 O'Brien PC, Fleming TR. A multiple testing procedure for clinical trials. *Biometrics*  
1979;**35**:549–56.<http://www.ncbi.nlm.nih.gov/pubmed/497341> (accessed 19 Jul 2019).

## Declarations

### Author Statement

KR, CS, JV, OM, SE, JH, SB, DA, BZ, AN, OM, and MN participated in the creation of the study concept, protocol implementation, and outcome selection. JV, CS, MQ, KV, OM, SB, DA, and MN developed the data for the power analysis, completed the simulations, and/or associated statistical analysis plan. CS, JV, MM, AM, BZ, TG, MD, BM, DA, and MN contributed to the development of the substudies and data repository. CS, JV, OS, DA, JK, OM, and MN oversaw the digital embedding of the SPRY-Application. KR, MQ, and JV were the major contributors in writing of the manuscript. All authors read and approved the final manuscript.

### Data Statement Section

Technical appendix and simulations were completed by Berry Consultants, LLC and are available within appendix of this publication.

### Funding

This work was supported by the UPMC Immune Transplant and Therapy Center, grant number IPA2019#8. Phone: 1-888-4UPMC-ITTC. website:  
<https://ittc.upmc.com/>

### Conflicts of Interest

The authors declare that they have no conflicts of interest.

### Acknowledgements



## SPRY-Metformin Protocol

1  
2  
3 We would like to acknowledge the significant contribution of the patients, families,  
4 researchers, data management teams, clinical staff, and sponsors for their support in  
5 the development and implementation of this study. We acknowledge the UPMC  
6 Department of Surgery and their patients for participating in SPRY-Metformin and all  
7 future aspects of SPRY. We acknowledge the Clinical Analytics in the Health  
8 Services Division at UPMC for preparing this data set with the support of Biostatistics  
9 and Data Management Core at the CRISMA Center in the Department of Critical  
10 Care Medicine at the University of Pittsburgh. We acknowledge the entire SPRY  
11 team for their contributions to this work.  
12  
13  
14  
15  
16  
17  
18  
19  
20  
21  
22  
23  
24  
25  
26  
27  
28  
29  
30  
31  
32  
33  
34  
35  
36  
37  
38  
39  
40  
41  
42  
43  
44  
45  
46  
47  
48  
49  
50  
51  
52  
53  
54  
55  
56  
57  
58  
59  
60

## Tables

**Table 1. Core Protocol and SPRY-Metformin Domain-Specific Appendix Inclusion and Exclusion Criteria**

| <b>SPRY</b>                                                                                                                                       |
|---------------------------------------------------------------------------------------------------------------------------------------------------|
| <u>Inclusion Criteria</u>                                                                                                                         |
| Adult ( $\geq 18$ years of age)                                                                                                                   |
| Evaluation at any preoperative elective clinic within the healthcare system                                                                       |
| Planned surgical intervention $\geq 7$ and $<180$ days following the preoperative encounter                                                       |
| <u>Exclusion Criteria</u>                                                                                                                         |
| Clinician deems inclusion may be potentially harmful                                                                                              |
| Emergent surgical procedure                                                                                                                       |
| Patient has participated in SPRY within the proceeding 90 days                                                                                    |
| <b>SPRY-Metformin<sup>a</sup></b>                                                                                                                 |
| <u>Inclusion Criteria</u>                                                                                                                         |
| Men and post-menopausal women who are $\geq 60$ years of age or are $<60$ years of age with a Charlson Comorbidity Index $>2$                     |
| Ability to swallow non-crushed pills                                                                                                              |
| <u>Exclusion Criteria</u>                                                                                                                         |
| Pre-existing type I or II diabetes mellitus                                                                                                       |
| Metformin use in the prior 6 months                                                                                                               |
| Known allergy to metformin                                                                                                                        |
| Acute or chronic metabolic acidosis with or without coma                                                                                          |
| History of lactic acidosis                                                                                                                        |
| History of excessive alcohol intake                                                                                                               |
| Severe hepatic dysfunction                                                                                                                        |
| Acute or chronic metabolic acidosis                                                                                                               |
| Hemodialysis, end-stage renal disease, or estimated glomerular filtration rate $<45$ in the 30 days prior to or on the day of in-person screening |

<sup>a</sup> Those in the motor study must be  $>65$  years of age with their home address  $<20$  miles of the central healthcare system academic hospital.

*Abbreviations:* SPRY: Strategies to Promote Resiliency.

## SPRY-Metformin Protocol

**Table 2. Secondary Endpoints**

|                                                                             |
|-----------------------------------------------------------------------------|
| <b>Postoperative index hospital course</b>                                  |
| Incidence and total duration of postoperative intensive care unit admission |
| Index hospital length of stay                                               |
| Hospital discharge location                                                 |
| Index hospitalization mortality rate                                        |
| <b>Within 30 days of the index operation</b>                                |
| Surgical site infection <sup>a</sup>                                        |
| Surgical Site occurrence <sup>b</sup>                                       |
| Organ failure free days <sup>c</sup>                                        |
| <b>Within 365 days of study drug exposure</b>                               |
| Incidence of re-operation                                                   |
| Number of participants with deep vein thrombosis                            |
| Number of participants with pulmonary embolus                               |
| Mortality                                                                   |
| Hospital readmission rates                                                  |

<sup>a</sup> Surgical site infection defined by National Surgical Quality Improvement Program [43]

<sup>b</sup> Surgical site occurrence defined by Ventral Hernia Working Group [44]

<sup>c</sup> Organ failure defined as mechanical ventilation, hemodialysis, or vasopressor exposure

## SPRY-Metformin Protocol

**Table 3. Longitudinal Quality of Life and Frailty Timeline**

| Baseline <sup>a</sup> | Postoperative Day 30 | Postoperative Day 90            |                                          |
|-----------------------|----------------------|---------------------------------|------------------------------------------|
|                       |                      | Phone                           | In-Person (Motor Subgroup <sup>b</sup> ) |
| EQ-5D                 | EQ-5D                | EQ-5D                           | EQ-5D                                    |
| MoCA-BLIND            |                      | FAQ                             | FAQ                                      |
|                       |                      | MoCA-BLIND                      | NIH Toolbox Cognitive                    |
|                       |                      | Haying Sentence Completion Test | 2-Minute Walk Test                       |
|                       |                      | Confusion Assessment Method     | Grip Strength                            |

<sup>a</sup> Baseline occurs within 7 days of randomization and prior to the surgical intervention.

<sup>b</sup> Omit the phone evaluation and undergo an in-person evaluation on postoperative day 90.

*Abbreviations:* (MoCA)-BLIND: Montreal Cognitive Assessment; FAQ: Functional Activities Questionnaire.

## Figure Legends

### **Figure 1. Concentric Consort Diagram – SPRY Core Protocol (Panel A) and Domain-Specific Appendix SPRY-Metformin Overlying the Core Protocol (Panel B)**

Panel A: The Core Protocol creates a research platform or infrastructure within clinical care for all enrolled into any SPRY Domain-Specific Appendix. This infrastructure includes virtual screening, informed consent, and randomization at preoperative clinic, automated perioperative electronic health record monitoring, and a primary outcome of 90-day hospital free days. Patient privacy is maintained and protected by the embedded application functioning behind the institutional firewall.

Panel B: The SPRY-Metformin Domain-Specific Appendix functions within the infrastructure of the SPRY Core Protocol. Prior to preoperative clinic, the SPRY-Application screens the scheduled preoperative clinic appointments and generates a list of potential patients for enrolling clinicians. In preoperative clinic recruitment, informed consent, and randomization are completed. Patients undergo baseline testing. Study drug exposure begins and continues through postoperative day 90 (green). The SPRY-Application (light blue) supports patient safety monitoring by generating EHR and email alerts, as needed. As possible, all trial aspects are embedded within the standard of care perioperative course. When 500 patients surpass postoperative day 90, *a priori* interim analysis is completed. Future enrollment is then guided by the pre-determined response adaptive randomization schemes and predetermined stopping rules.

## SPRY-Metformin Protocol

*Abbreviations:* REMAP: Randomized embedded multifactorial adaptive platform; SPRY: Strategies to Promote Resiliency; POD: postoperative day; HIPAA: Health Insurance Portability and Accountability Act.

### Figure 2. Virtual and In-Person Screening and Randomization

<sup>a</sup> <7 or >180 Preoperative Days

<sup>b</sup> Charlson Comorbidity Index (CCI) required within the 365 days prior to screening.

Virtual recruitment is completed by SPRY-Application (light blue) reviewing a subset of SPRY and SPRY-metformin enrollment criteria. The SPRY-Application then guides the clinical provider to complete the in-person screening and informed consent. Any discrepancies found between the clinical parameters within SPRY-Application and the patient's reported health state are manually updated within the EHR and patients are randomized.

### Figure 3. SPRY-Metformin Timeline

<sup>a</sup> If patients are discharged on the day of the surgical intervention, lab sample 4 will be omitted.

If hospital discharge occurs prior to postoperative day 3, lab sample 4 occur immediately prior to discharge

<sup>b</sup> Longitudinal testing at contact point 6 testing is dependent on participation in the motor subgroup (Table 3)

Patients are recruited, consented by providers, randomized, undergo baseline venous blood sampling, and are provided study drug at preoperative clinic (contact point 1). In the 7 to 180 preoperative days, patients undergo baseline testing (Table 3) and both patient safety and study drug compliance is monitored via phone interview (contact point 2). Three venous blood samples are coupled with clinical blood draws throughout the operative hospital admission

## SPRY-Metformin Protocol

(contact point 3). A final venous sample is collected in standard of care postoperative clinic (contact point 4). At postoperative day 30 and 90, patients are contacted to monitor both patient safety and study drug compliance, collect postoperative outcomes (Table 2), and complete additional outcome testing (Table 3).

*Abbreviations:* Strategies to Promote Resiliency, SPRY; Charlson Comorbidity Index, CCI; diabetes mellites type 1, DM1; diabetes mellites type 2, DM2; estimated glomerular filtration rate, eGFR; randomized embedded multifactorial adaptive platform, REMAP.

### **Figure 4. REMAP SPRY Administrative Organization**

The Trial Steering Committee receives trial updates from the Statistical Monitoring Committee as well as recommendations from the Data and Safety Monitoring Board to oversee all trial conduct.

*Abbreviations:* Strategies to Promote Resiliency, SPRY.

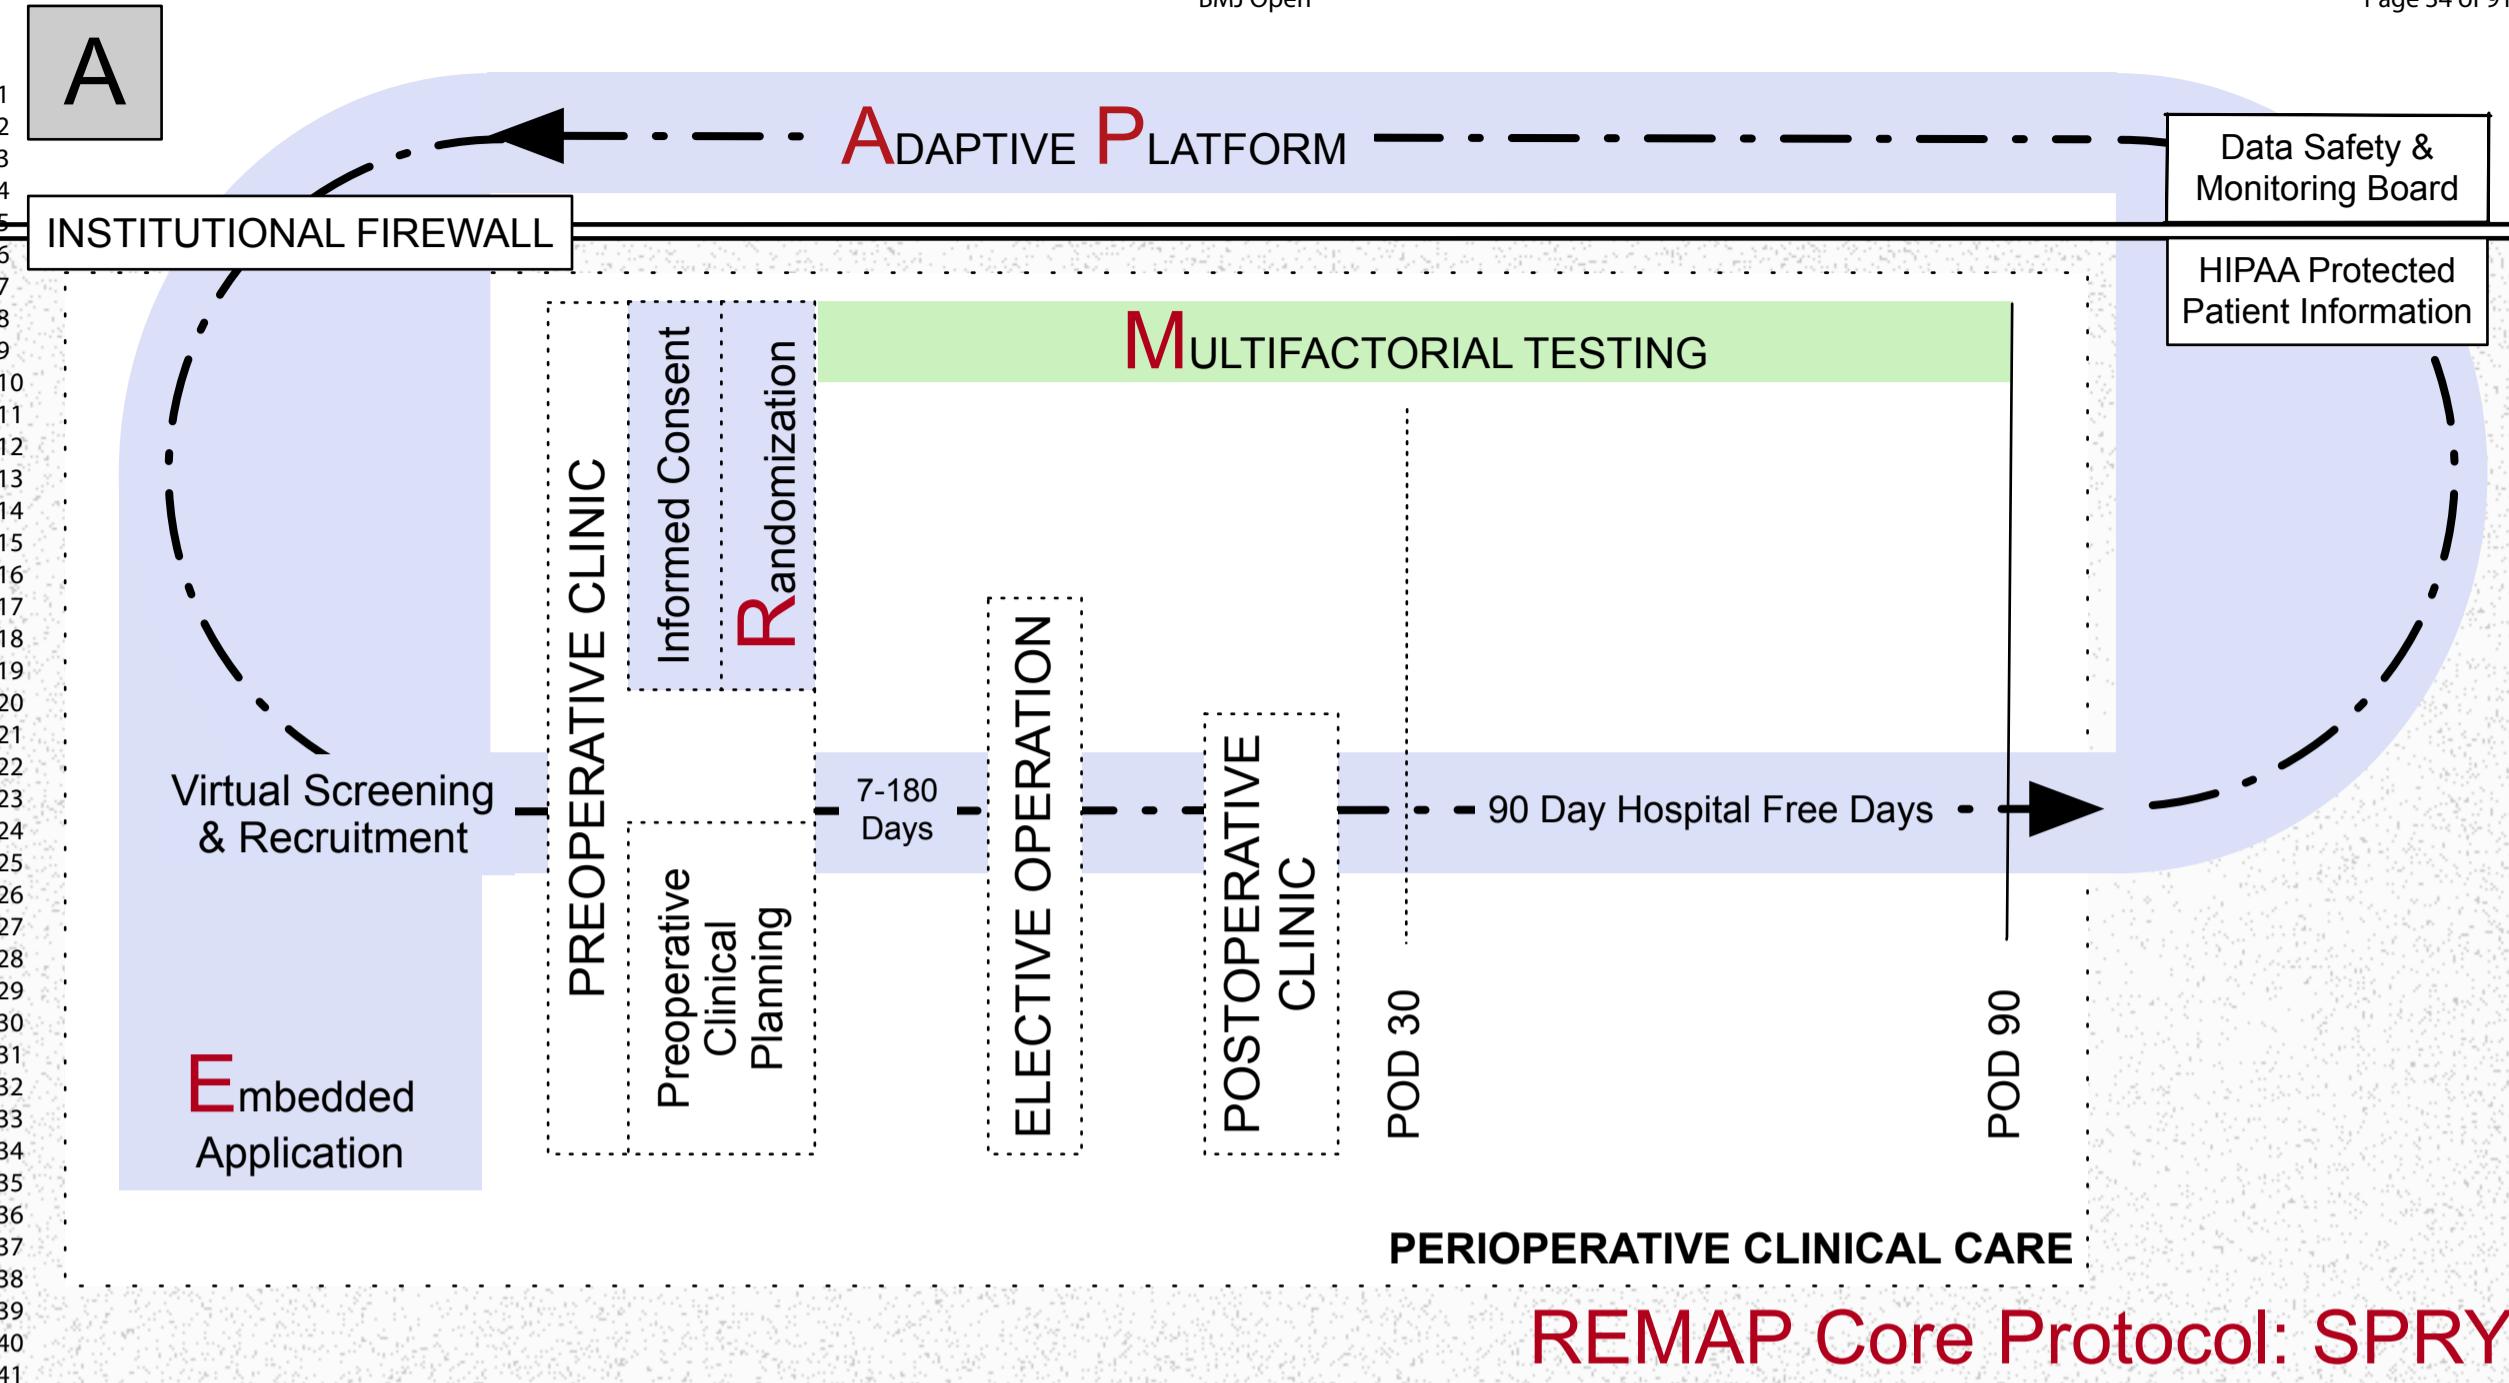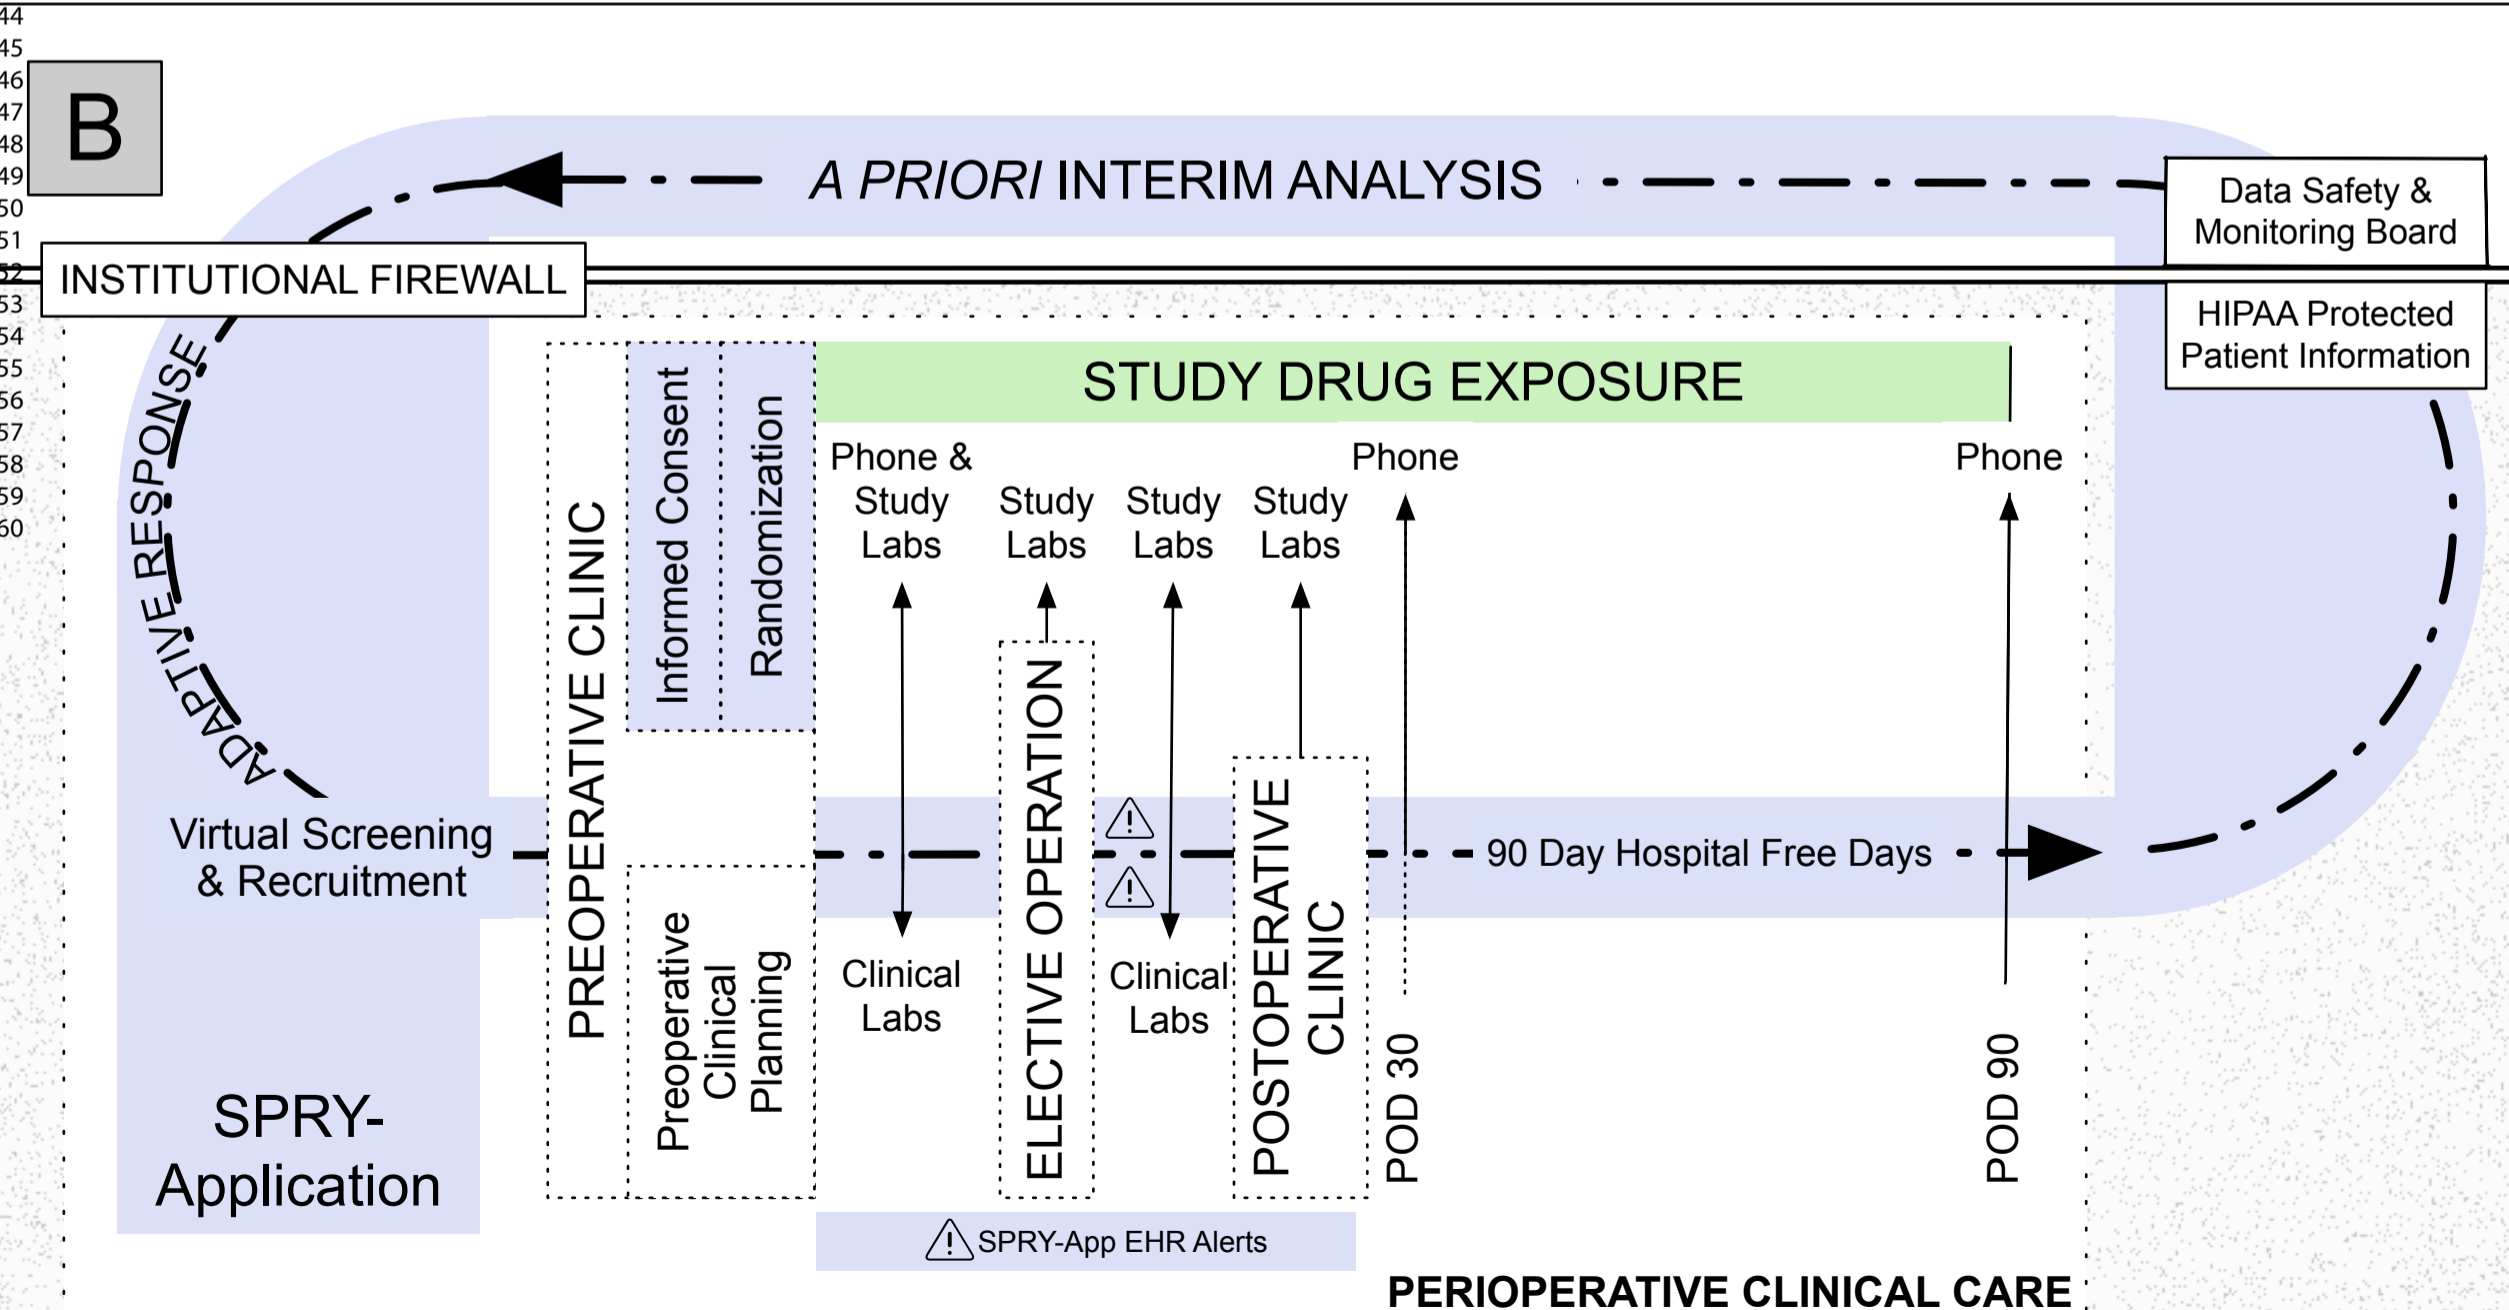



1  
2  
3  
4  
5  
6  
7  
8  
9  
10  
11  
12  
13  
14  
15  
16  
17  
18  
19  
20  
21  
22  
23  
24  
25  
26  
27  
28  
29  
30  
31  
32  
33  
34  
35  
36  
37  
38  
39  
40  
41  
42  
43  
44  
45  
46  
47  
48  
49  
50  
51  
52  
53  
54  
55  
56  
57  
58  
59  
60

SPRY-Application

Preoperative Clinic Screening, Consent, Randomization:  
Provider SPRY-App Interface

Virtual Recruitment:  
SPRY-App Identification

Preoperative Evaluation for Elective Operation

SPRY Core Protocol Eligible

SPRY-metformin DSA Eligible

Informed Consent

Randomization

Age <18  
Previously enrolled in REMAP  
Incorrect preoperative window<sup>a</sup>

Age <60 and CCI<3<sup>b</sup>  
History of DM1 or DM2  
eGFR <45  
Metformin allergy

Patient defers participation

Virtual recruitment confirmed:  
Age <60 and CCI<3<sup>b</sup>  
History of diabetes (type 1 or 2)  
eGFR <45  
Previously enrolled REMAP-OSO  
Metformin allergy

Premenopausal

Unable to swallow whole pills  
Medication exposure (<6mo):  
Metformin  
Active medications:  
Carbonic anhydrase inhibitor  
Cimetidine  
Diabetes medications

Hemodialysis  
History of acute or chronic metabolic acidosis  
History of lactic acidosis  
Severe hepatic dysfunction  
Alcohol abuse

*EHR Reviewed & Updated*

*EHR Reviewed & Updated*

*EHR Reviewed & Updated*

1  
2  
3  
4  
5  
6  
7  
8  
9  
10  
11  
12  
13  
14  
15  
16  
17  
18  
19  
20  
21  
22  
23  
24  
25  
26  
27

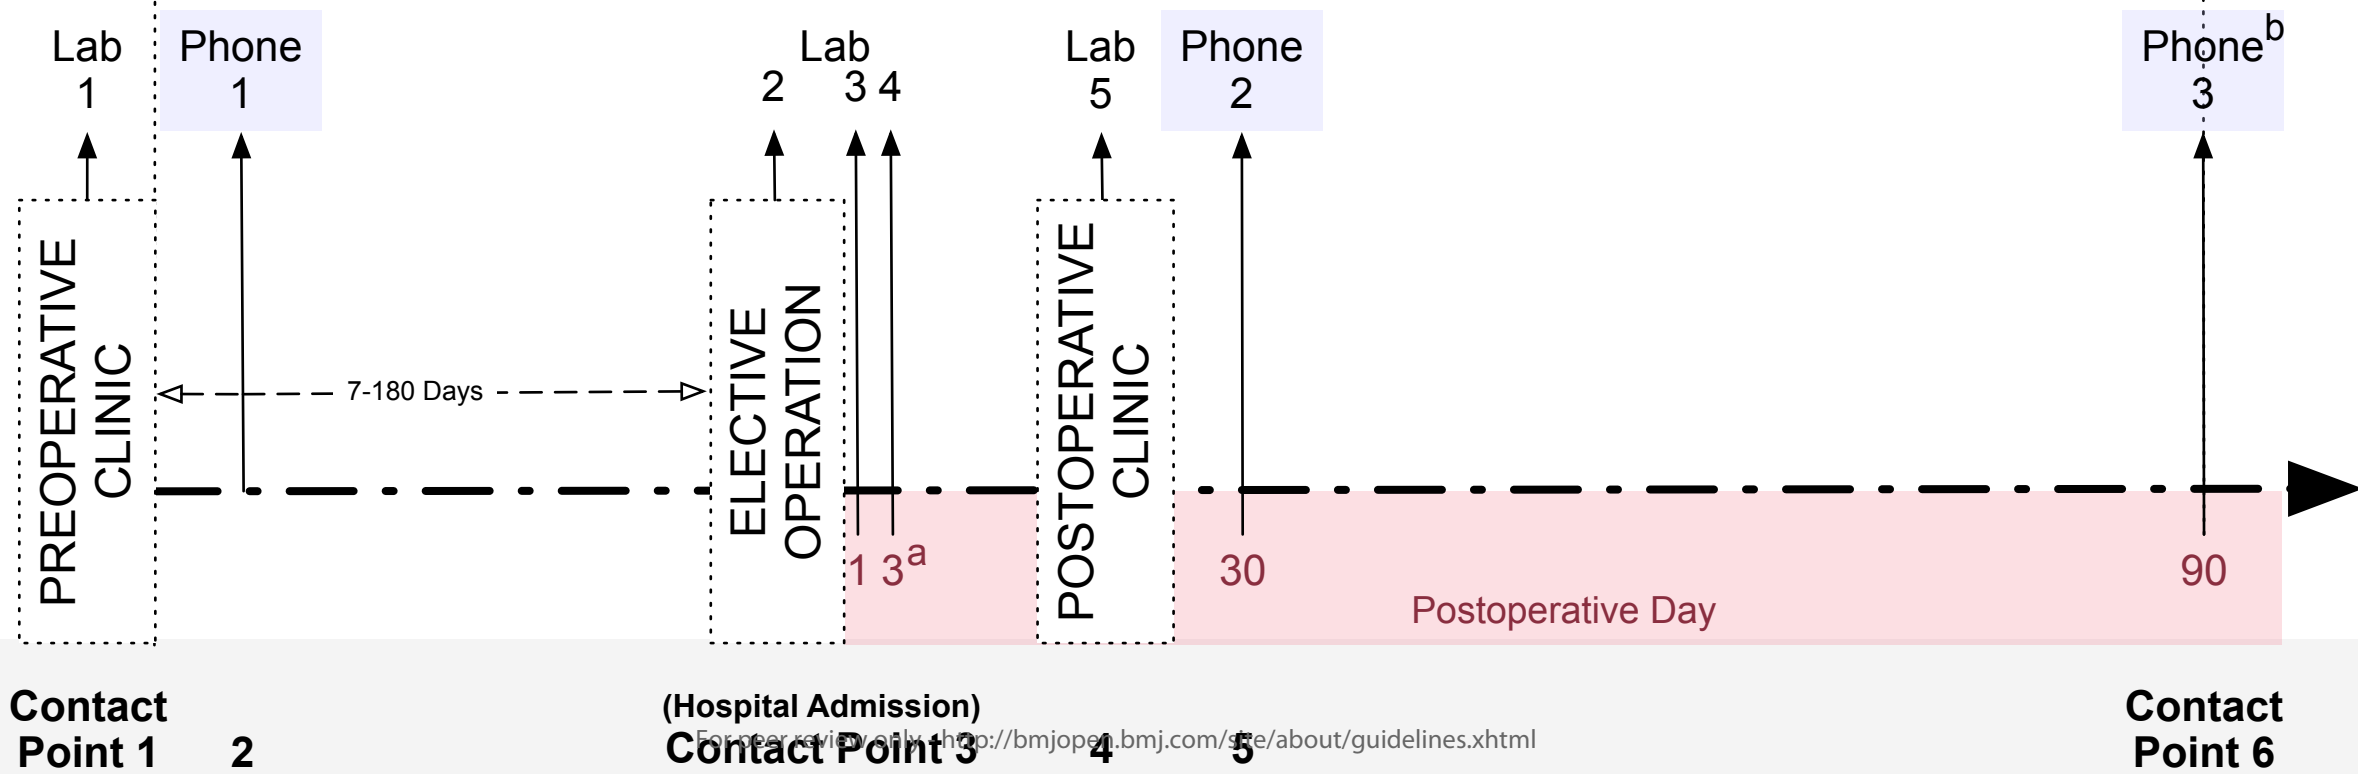

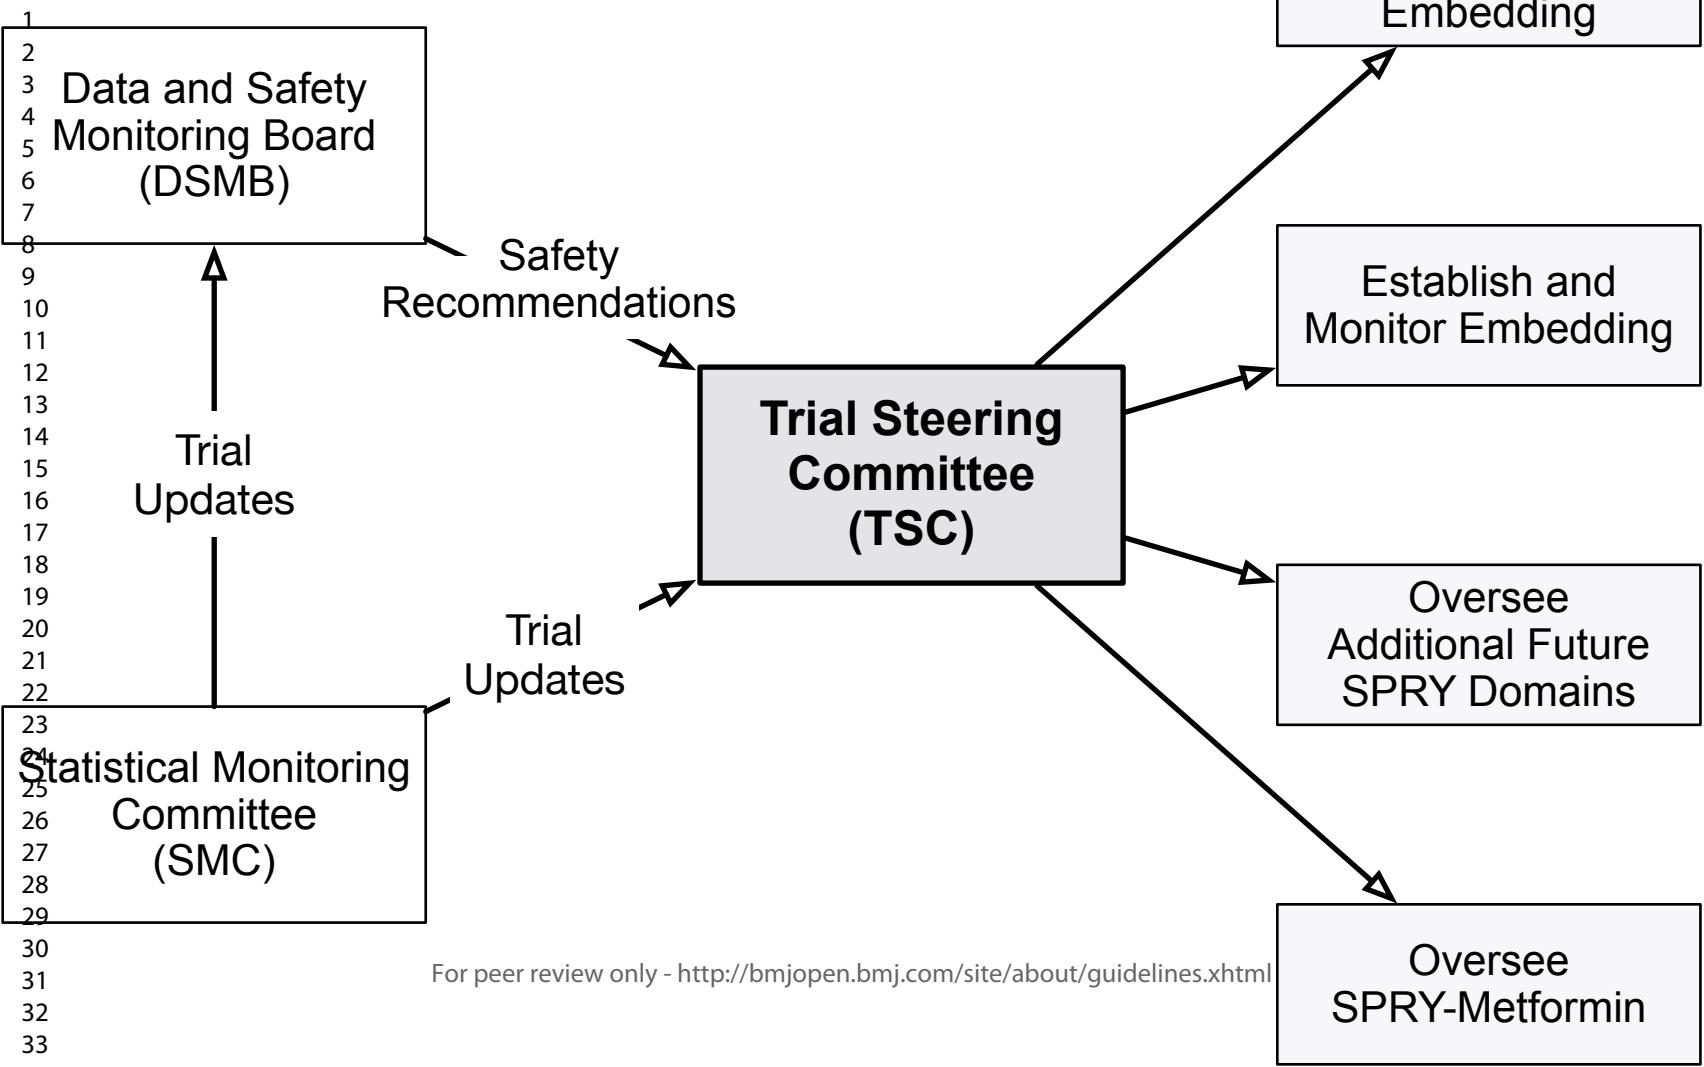

1  
2  
3 Data and Safety  
4 Monitoring Board  
5 (DSMB)  
6  
7

8  
9  
10  
11  
12  
13  
14  
15  
16  
17  
18  
19  
20  
21  
22  
23  
24  
25  
26  
27  
28  
29

30  
31  
32  
33

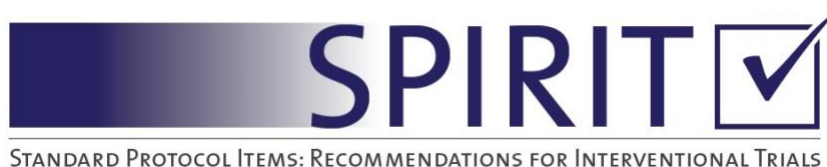

SPIRIT 2013 Checklist: Recommended items to address in a clinical trial protocol and related documents\*

| Section/item                      | Item No | Description                                                                                                                                                                                                                                                                                                                                                                                                                                                                                                                                                                                                                                                                                                                                                                                                                    |
|-----------------------------------|---------|--------------------------------------------------------------------------------------------------------------------------------------------------------------------------------------------------------------------------------------------------------------------------------------------------------------------------------------------------------------------------------------------------------------------------------------------------------------------------------------------------------------------------------------------------------------------------------------------------------------------------------------------------------------------------------------------------------------------------------------------------------------------------------------------------------------------------------|
| <b>Administrative information</b> |         |                                                                                                                                                                                                                                                                                                                                                                                                                                                                                                                                                                                                                                                                                                                                                                                                                                |
| Title                             | 1       | Descriptive title identifying the study design, population, interventions, and, if applicable, trial acronym<br><br><b>Strategies to Promote Resiliency (SPRY): A Randomized Embedded Multifactorial Adaptative Platform (REMAP) Clinical Trial Protocol to Study Interventions to Improve Recovery after Surgery in High Risk Patients</b>                                                                                                                                                                                                                                                                                                                                                                                                                                                                                    |
| Trial registration                | 2a      | Trial identifier and registry name. If not yet registered, name of intended registry<br><br><b>Clinicaltrials.gov: NCT03861767</b>                                                                                                                                                                                                                                                                                                                                                                                                                                                                                                                                                                                                                                                                                             |
|                                   | 2b      | All items from the World Health Organization Trial Registration Data Set<br><br><b>The most accurate and current information regarding the World Health Organization Trial Registration Data Set can be found on clinicaltrials.gov which is maintained by our research team, as mandated by our institutional review board.</b>                                                                                                                                                                                                                                                                                                                                                                                                                                                                                               |
| Protocol version                  | 3       | Date and version identifier<br><br><b>Please see ClinicalTrials.gov</b>                                                                                                                                                                                                                                                                                                                                                                                                                                                                                                                                                                                                                                                                                                                                                        |
| Funding                           | 4       | Sources and types of financial, material, and other support<br><br><b>This project is funded internally by UPMC through the UPMC Immune Transplant and Therapy Center.</b>                                                                                                                                                                                                                                                                                                                                                                                                                                                                                                                                                                                                                                                     |
| Roles and responsibilities        | 5a      | Names, affiliations, and roles of protocol contributors and Name and contact information for the trial sponsor<br><br><b>Protocol Contributors: KR, CS, JV, OM, SE, JH, SB, DA, and MN participated in the creation of the study concept, protocol implementation, and outcome selection. JV, CS, MQ, KV, OM, SB, DA, and MN developed the data for the power analysis, completed the simulations, and/or associated statistical analysis plan. CS, JV, MM, AM, BZ, TG, DA, and MN contributed to the development of the substudies and data repository. CS, JV, OS, DA, and MN oversaw the digital embedding of the SPRY-Application. KR and JV were the major contributors in writing of the manuscript. All authors read and approved the final manuscript. Please see the authorship list for the affiliation details.</b> |
|                                   | 5b      |                                                                                                                                                                                                                                                                                                                                                                                                                                                                                                                                                                                                                                                                                                                                                                                                                                |

## Trial Sponsor: UPMC Immune Transplant and Therapy Center

- 5c Role of study sponsor and funders, if any, in study design; collection, management, analysis, and interpretation of data; writing of the report; and the decision to submit the report for publication, including whether they will have ultimate authority over any of these activities

**The UPMC Immune Transplant and Therapy Center are updated each quarter on the progress of this project. Study design; collection, management, analysis, and interpretation of data; writing of the report; and the decision to submit the report for publication are decided by the REMAP SPRY and REMAP UPMC teams and are independent of The UPMC Immune Transplant and Therapy Center.**

- 5d Composition, roles, and responsibilities of the coordinating centre, steering committee, endpoint adjudication committee, data management team, and other individuals or groups overseeing the trial, if applicable (see Item 21a for data monitoring committee)

**Three independent groups were established to provide oversight for SPRY-Metformin: Trial Steering Committee (TSC), Statistical Monitoring Committee (SMC), and Data Safety and Monitoring Boards (DSMB). The blinded TSC oversees the overall trial conduct and makes recommendations regarding all trial-related decisions. The unblinded statisticians of the SMC are responsible for conducting and monitoring the interim analyses reporting patient enrollment, patient status, and a summary of trial adaptations based upon the pre-specified protocol. The DSMB, which constitutes expert clinical trialists, statisticians, and clinicians independent of the protocol contributors or trial sponsors. The DSMB reviews patient safety and protocol compliance reports generated by the SMC and makes trial conduct recommendations to the TSC (Figure 5).**

## Introduction

### Background and rationale

- 6a Description of research question and justification for undertaking the trial, including summary of relevant studies (published and unpublished) examining benefits and harms for each intervention

**We hypothesize that pharmacologic perioperative optimization will improve surgical outcomes for an aged, frail patient population. The theorized mechanisms are discussed within the associated manuscript. Notably, however traditionally in diabetics, metformin is discontinued throughout the perioperative period because of both potential hypoglycemia and the theoretical risk of metabolic induced lactic acidosis. As monotherapy, metformin is not expected to cause hypoglycemia [1]. Multiple cohort studies and meta-analysis have demonstrated the risk of metabolic acidosis to diabetics is not higher in those prescribed metformin [2]. Therefore, there is no expected risk of metformin induced lactic acidosis in those with adequate screening for renal and hepatic function [2,3]. Therefore, perioperative metformin is the first optimization strategy to be tested on the SPRY Core Protocol.**

- 6b Explanation for choice of comparators

In the SPRY Metformin platform, three doses (500mg, 1000mg, 1500mg) of metformin will be compared to placebo. Although the literature supports salient inflammatory effects at lower doses<sup>[4,5]</sup>, yet the dose required for a clinically meaningful change in the primary outcome is unknown and the main objective of this platform. The posterior probabilities and pooled estimates, gleamed from a Bayesian statistical analysis plan and adaptive design which allows in trial assessment and adaptive randomization.

We intend to use the placebo as an important control measure of not only clinical outcomes, but also for the exploratory data to be produced from samples provided within our biorepository. We have chosen to use randomization in conjunction with placebo in order to maintain allocation concealment and minimize systemic error including selection bias, performance bias, and ascertainment bias. Yet, our primary outcome cumulates objective outcomes (i.e., hospital length of stay, acute care hospital readmission, and death) into a single value – hospital free days. These measures are less likely to be altered by the patients, researcher's, or providers' perceptions of the therapy. Therefore, the objective outcomes and the desire to both maintain the pragmatic integration of the trial within the clinical standard culminated in the decision to minimize the in-trial assessment of compliance through only verbal confirmation during patient interactions.

Objectives 7 Specific objectives or hypotheses

**Please see the section, Methods/Design and subtitled Aims.**

Trial design 8 Description of trial design including type of trial (eg, parallel group, crossover, factorial, single group), allocation ratio, and framework (eg, superiority, equivalence, noninferiority, exploratory)

**Superiority trial with parallel group, adaptive randomization. Please see the Statistical Analysis Appendix.**

#### **Methods: Participants, interventions, and outcomes**

Study setting 9 Description of study settings (eg, community clinic, academic hospital) and list of countries where data will be collected. Reference to where list of study sites can be obtained

**Recruitment, enrollment, consent, and study drug dose randomization occur within standard of care preoperative surgical and anesthesia clinic appointments at UPMC hospitals in southwestern Pennsylvania, USA.**

**The study protocol is embedded within the workflow of both the electronic health record and the clinical care of patients. The final manuscript will include the list of enrolling clinics, the number of patients who were screened (both digitally and in-person) and enrolled per clinic, and the amount of clinical research staff support requested and required per clinic.**

Eligibility criteria 10 Inclusion and exclusion criteria for participants. If applicable, eligibility criteria for study centres and individuals who will perform the interventions (eg, surgeons, psychotherapists)

**Please see Table 1 for a full set of inclusion and exclusion criteria. Metformin prescriptions will be provided by medical doctors caring for and enrolling patients in preoperative clinics. Surgical interventions will be performed by attending surgeons at UPMC, as per the standard of patient care.**

Interventions 11a Interventions for each group with sufficient detail to allow replication, including how and when they will be administered

**Following confirming all inclusion and no exclusion criteria is met enrollment, and randomization study drug is provided to patients from established stock at each enrolling sight. Each study drug kit comes with the dosage specific number of 500mg of metformin ER or 500mg metformin ER matched placebo pills (i.e., two tablets per day for 1000mg metformin daily randomization). Patients allocated to the 1500mg arm are prescribed two 500mg tablets for seven days before ramping up to the full three tablet dose [6]. In the placebo arm, the same ramp up procedure and multiple dosages are used maintaining the blinded nature of this study.**

**Study drug is maintained throughout the duration of the preoperative period into the postoperative period and for 90 days thereafter. Notably, the medication is not discontinued or held, unless deemed medically necessary by the research or clinical team, in the perioperative period.**

11b Criteria for discontinuing or modifying allocated interventions for a given trial participant (eg, drug dose change in response to harms, participant request, or improving/worsening disease)

**Please see the section, EHR Embedded Safety Alerts.**

11c Strategies to improve adherence to intervention protocols, and any procedures for monitoring adherence (eg, drug tablet return, laboratory tests)

**Study drug compliance and patient safety are monitored prospectively via phone interviews completed throughout the study. To maintain the integration within clinical care, supported by cultural and digital embedding, study drug is not collected nor are systemic metformin levels assessed throughout the trial.**

11d Relevant concomitant care and interventions that are permitted or prohibited during the trial

**All standard of care perioperative care and interventions, as deemed appropriate by the clinical team are permitted.**

Outcomes 12 Primary, secondary, and other outcomes, including the specific measurement variable (eg, systolic blood pressure), analysis metric (eg, change from baseline, final value, time to event), method of aggregation (eg, median, proportion), and time point for each outcome. Explanation of the clinical relevance of chosen efficacy and harm outcomes is strongly recommended

**Please see the section, Endpoints within the manuscript; the following sections within the Statistical Analysis Appendix, 2.0 and 2.3; and SPIRIT guideline 18.**

**Please note, potential and/or actual patients were not engaged when considering the current protocol or endpoints.**

1  
2  
3  
4  
5  
6  
7  
8 Participant timeline 13 Time schedule of enrolment, interventions (including any run-ins and washouts), assessments, and visits for participants. A schematic diagram is highly recommended (see Figure)

9  
10  
11  
12 **This trial has no run in or wash out periods. All patient interactions and the duration of active patient observation are seen and described within Figure 1, 2, and 4.**

13  
14  
15  
16 Sample size 14 Estimated number of participants needed to achieve study objectives and how it was determined, including clinical and statistical assumptions supporting any sample size calculations

17  
18  
19  
20 **Please see Statistical Analysis Appendix, Section 3 and 4.**

21  
22  
23 Recruitment 15 Strategies for achieving adequate participant enrolment to reach target sample size

24  
25  
26 **The simulations used to power this trial were generated from retrospective UPMC data. Therefore, the surgical volume and patients expected to meet all inclusion and no exclusion criteria is known and therefore is not expected to be a limitation of this study.**

27  
28  
29  
30  
31 **The cultural embedding and generation of a self-learning health system is fundamental to the adequately enrolling patients. If trial enrollment is not on target at any or all sites, we will regularly meet with clinical and research staff within each clinic site. We will assess any issues with workflow, patient enrollment, and patient interest. Adjustments may then be made on a clinic level or for the entirety of the trial. Please see guideline 9.**

32  
33  
34  
35  
36  
37  
38  
39 **Methods: Assignment of interventions (for controlled trials)**



1  
2  
3  
4  
5  
6  
7  
8  
9  
10  
11  
12  
13  
14  
15  
16  
17  
18  
19  
20  
21  
22  
23  
24  
25  
26  
27  
28  
29  
30  
31  
32  
33  
34  
35  
36  
37  
38  
39  
40  
41  
42  
43  
44  
45  
46  
47  
48  
49  
50  
51  
52  
53  
54  
55  
56  
57  
58  
59  
60

Allocation:

Sequence generation

16a Method of generating the allocation sequence (eg, computer generated random numbers), and list of any factors for stratification. To reduce predictability of a random sequence, details of any planned restriction (eg, blocking) should be provided in a separate document that is unavailable to those who enrol participants or assign interventions

**Randomization is performed based on pre-specified randomization tables that utilize block randomization within each strata. Randomization is stratified by enrollment site, patient age, and the preoperative duration of study drug exposure.**

Concealment mechanism

16b Mechanism of implementing the allocation sequence (eg, central telephone; sequentially numbered, opaque, sealed envelopes), describing any steps to conceal the sequence until interventions are assigned

**The Investigational Drug Service maintains an up to date log of study drug package available in each outpatient enrolling clinic. When the patient is randomized, the SPRY-Application then informs the clinical research team and/or clinical provider administering study drug which study drug packer, within that physical clinic, to provide the patient. Therefore, the SPRY-Application in conjunction with the Investigational**

**Drug Services are integral to allocating study drug and ensuring that patients, providers, the TSC, and clinical research staff are blinded.**

Implementation 16c Who will generate the allocation sequence, who will enrol participants, and who will assign participants to interventions

**The allocation sequence is generated by the statisticians at the start of the trial and adjusted at each adaptive randomization time point. Patients are enrolled by either clinical research staff or clinical providers who are completing the standard of care patient encounter. The enrollment protocol is determined by the workflow within each clinic when the site begins enrolling patients and should be an iterative process to support the overall aim of generating a self-learning health system. In order to understand the effects of the clinical embedding on the trial results, clinic specific enrollment reporting is discussed in guideline 9.**

Blinding (masking) 17a Who will be blinded after assignment to interventions (eg, trial participants, care providers, outcome assessors, data analysts), and how

**Patients are randomly allocated to 1-3 tablets of daily metformin ER or 1-3 tables of daily placebo which matches metformin ER, with minor differences as required by the Food and Drug Association. Patients or providers may know that they are receiving either 500mg of metformin or 1 tablet of placebo. Therefore, trial participants, clinical care providers, research staff, and data analysts are all blinded to the allocation of metformin or placebo, but not to the potential dose of the study drug.**

17b If blinded, circumstances under which unblinding is permissible, and procedure for revealing a participant's allocated intervention during the trial

**Unblinding is permissible if required by the TSC, SMC, or DSMB in order to maintain participant safety.**

**Methods: Data collection, management, and analysis**

Data collection methods 18a Plans for assessment and collection of outcome, baseline, and other trial data, including any related processes to promote data quality (eg, duplicate measurements, training of assessors) and a description of study instruments (eg, questionnaires, laboratory tests) along with their reliability and validity, if known. Reference to where data collection forms can be found, if not in the protocol

**The primary outcome is 90-day hospital free days. If a patient is discharged and readmitted, then this hospital exposure is added to the duration of the primary admission. Hospitalizations within the healthcare system are monitored and recorded by the EHR embedded SPRY-Application. Out of system hospitalizations are reviewed at each postoperative point of contact (2, 5, 6; Figure 4). Emergency department and unplanned outpatient evaluations without admissions are not included in this composite. Any person who dies within this 90-day period is assigned -1 HFD, even if there is a period during which the patient is not within the hospital. Thus, mortality is**

specifically captured, and this endpoint reflects the recovery for high-risk patients following a major surgical intervention.

Patient vitality, date and cause of death, is monitored in three ways in the clinical research data repository: 1) Prospective patient interaction at established contact points, 2) updates of electronic health record documentation of death within a UPMC healthcare system-based facility (e.g. nursing or rehabilitation facilities, emergency departments, and/or acute care hospitals), 3) monthly updates of the Social Security Administrative Death data files. Notably, when compared to a prospective patient registry, our combined (2) EHR vitality status and (3) Social Security Administrative data file is 94% sensitivity and 92% specificity. Therefore, in combination with prospective patient monitoring the internal validity of postoperative mortality is accurate.

The predefined secondary endpoints include clinically significant and patient centered outcomes which have accepted, published, and validated definitions (Table 2). Further, the longitudinal quality of life and frailty outcomes (Table 3), are administered in accordance with test-specific, standard protocols by trained clinical research staff with experience with other prospective quantitative and qualitative patient assessments.

**Clinical research forms provided as an appendix.**

- 18b Plans to promote participant retention and complete follow-up, including list of any outcome data to be collected for participants who discontinue or deviate from intervention protocols

**The primary analysis follows an intention to treat analysis plan. Please see the statistical analysis plan and associated appendix for treatment of missing data.**

- Data management 19 Plans for data entry, coding, security, and storage, including any related processes to promote data quality (eg, double data entry; range checks for data values). Reference to where details of data management procedures can be found, if not in the protocol

Data quality is monitored on several levels. First, data is abstracted in real time from structured EHR data via tables generated commercially by CERNER and EPIC. Second, these data are monitored by UPMC Clinical Analytics in conjunction with Biostatistical and Data Management Core who provide oversight of these and other data abstract for the quality improvement of the healthcare system and research specific data. Data abstracted specifically for SPRY was collected retrospectively from a subset of non-study patients and validated against clinical adjudication. Third, data are monitored by the blinded TSC for face validity. Fourth, data collected by clinical research staff from patient encounters is recorded on the clinical research forms and uploaded into the data repository with value ranges appropriate for each variable.

All EHR data is stored within the Biostatistics and Data Management Core at the CRISMA Center in the Department of Critical Care Medicine at the University of Pittsburgh.

- 1  
2  
3  
4  
5  
6  
7  
8  
9  
10  
11  
12  
13  
14  
15  
16  
17  
18  
19  
20  
21  
22  
23  
24  
25  
26  
27  
28  
29  
30  
31  
32  
33  
34  
35  
36  
37  
38  
39  
40  
41  
42  
43  
44  
45  
46  
47  
48  
49  
50  
51  
52  
53  
54  
55  
56  
57  
58  
59  
60
- Statistical methods 20a Statistical methods for analysing primary and secondary outcomes. Reference to where other details of the statistical analysis plan can be found, if not in the protocol
- Please see the section, Statistical Analysis and the Statistical Analysis Appendix.**
- 20b Methods for any additional analyses (eg, subgroup and adjusted analyses)
- Please see the section, Statistical Analysis and the Statistical Analysis Appendix.**
- 20c Definition of analysis population relating to protocol non-adherence (eg, as randomised analysis), and any statistical methods to handle missing data (eg, multiple imputation)
- Methods: Monitoring** **Please see the section, Statistical Analysis and the Statistical Analysis Appendix.**
- Data monitoring 21a Composition of data monitoring committee (DMC); summary of its role and reporting structure; statement of whether it is independent from the sponsor and competing interests; and reference to where further details about its charter can be found, if not in the protocol. Alternatively, an explanation of why a DMC is not needed
- In this trial, data are managed by the Statistical Monitoring Committee (SMC), who are unblinded University of Pittsburgh Statisticians. This group works in conjunction with the TSC and DSMB to ensure the safety of those enrolled in our trial. The SMC has no competing interests to disclose. Notably, the interim and final data analysis for trial decision making including adaptive randomization and effectiveness will be completed by Berry Consultants, LLC, as discussed elsewhere.**
- 21b Description of any interim analyses and stopping guidelines, including who will have access to these interim results and make the final decision to terminate the trial
- Interim analysis is completed each time 500 patients have been randomized across all preoperative durations and followed for 90 postoperative days. At each interim analysis, the trial can be stopped early for demonstrating efficacy on any one of the metformin doses compared to placebo. If the trial has not stopped for success, the response adaptive randomization will preferentially randomize to the best performing metformin doses within each preoperative duration while maintaining the allocation to placebo. If there is a low posterior probability of efficacy (odds ratio,  $OR \leq 0.8$ ), single or multiple doses can be dropped for futility. If all doses have been dropped within a preoperative duration, enrollment to that preoperative duration will be stopped. Finally, the maximum sample size will be increased from 2,000 to 2,500 if at least one dose within one preoperative duration has  $\geq 50\%$  posterior probability of efficacy ( $OR \leq 0.8$ ).**

The interim analyses and all resulting actions including updates to randomization probabilities are pre-specified and not subject to recommendations from the Data Safety and Monitoring Boards (DSMB). However, the DSMB may make recommendations regarding safety, trial conduct, or ongoing scientific validity, integrity, and both clinical and scientific relevance of the study.

Please see the section, Platform conclusion; and the Statistical Analysis Appendix.

Harms 22 Plans for collecting, assessing, reporting, and managing solicited and spontaneously reported adverse events and other unintended effects of trial interventions or trial conduct

Generally, only serious adverse events (SAE) that are not trial endpoints require reporting. SAE reporting is completed as a hybrid approach, with both automated monitoring and a more traditional patient interaction. Safety monitoring and EHR and email alerts, as discussed in the main protocol manuscript, include organ dysfunction (i.e., creatinine elevations and hepatic function abnormalities) and hospital admission/discharge notifications. These automated SAEs are supplemented by periodic chart review, completed by the research team, as well as patient interactions at key patient contact points throughout the postoperative monitoring period. At this time, patient wellness is confirmed, study drug compliance is discussed, and any the occurrence of any SAEs are addressed.

All SAE data will be uploaded, with all other trial data, to the Biostatistical and Data Management Core.

Auditing 23 Frequency and procedures for auditing trial conduct, if any, and whether the process will be independent from investigators and the sponsor

For SPRY-Metformin, we have established a separate data and safety monitoring board (DSMB). The DSMB is comprised of individuals with expertise in adaptive clinical trials, statistics, aging, and perioperative care. Under a separate charter agreement, the DSMB will form and will, with autonomy, provide oversight and monitoring for this clinical trial. This monitoring includes, but is not limited to, clinical trial recruitment/retention processes, data timeliness and quality, and subject privacy and data confidentiality aspect. This DSMB will review interim data analyses and will make recommendations on whether the study should continue, continue with modification, or terminate based upon these analyses. When the trial is actively enrolling patients, the DSMB will meet quarterly.

## Ethics and dissemination

Research ethics approval 24 Plans for seeking research ethics committee/institutional review board (REC/IRB) approval

Both the Core Protocol and SPRY-Metformin Domain-specific Appendix were independently approved at the University of Pittsburgh Institutional Review Board (IRB# 18060039, 18060038) without a

**required Investigational New Drug exemption from the Food and Drug Administration.**

- 1  
2  
3 Protocol amendments 25 Plans for communicating important protocol modifications (eg, changes to  
4 eligibility criteria, outcomes, analyses) to relevant parties (eg, investigators,  
5 REC/IRBs, trial participants, trial registries, journals, regulators)  
6  
7 **Any and all protocol modifications will be reviewed by the TSC. If  
8 deemed necessary, appropriate updates to the IRB will be submitted  
9 for review. Once approved, any and all additional updates will be made  
10 to the trial registry (ClinicalTrials.gov), investigators, SMC and DSMB. If  
11 protocol adjustments require changes to the informed consent  
12 documentation, the IRB will help guide the TSC for patient notification  
13 and/or additional required consent for those actively enrolled.**  
14
- 15 Consent or 26a Who will obtain informed consent or assent from potential trial participants or  
16 assent authorised surrogates, and how (see Item 32)  
17  
18 **SPRY-Metformin randomizes patients to study drug. Therefore, as  
19 mandated by our institutional review board, informed consent will be  
20 obtained by a physician or provider with a license to prescribe  
21 medications to patients.**  
22  
23 **Please see the sample patient consent form (Appendix 4).**  
24
- 25 26b Additional consent provisions for collection and use of participant data and  
26 biological specimens in ancillary studies, if applicable  
27  
28 **The informed consent addresses all biologic samples to be obtained in  
29 the SPRY protocol. If patients are appropriate for and agree to  
30 participate in substudies, they will then undergo the informed consent  
31 process for these sample collections.**  
32  
33
- 34 Confidentiality 27 How personal information about potential and enrolled participants will be  
35 collected, shared, and maintained in order to protect confidentiality before,  
36 during, and after the trial  
37  
38 **All clinical data are collected from either the electronic health record or  
39 patient interactions and stored in the clinical research data repository  
40 managed by Biostatistical and Data Management Core in the  
41 Department of Critical Care Medicine at UPMC. Patient information that  
42 is shared with investigators beyond University of Pittsburgh or UPMC  
43 (i.e., the DSMB) will be shared as cumulative data when possible and  
44 de-identified to both maintain the integrity of the randomization  
45 blinding and protect the privacy of trial participants.**  
46  
47 **For additional information on protected confidential data accessed by  
48 the SPRY-Application, please see the Digital Embedding section.**  
49
- 50  
51 Declaration of 28 Financial and other competing interests for principal investigators for the  
52 interests overall trial and each study site  
53  
54 **The investigators have no competing interests to report.**  
55  
56  
57  
58  
59  
60

1 Access to 29 Statement of who will have access to the final trial dataset, and disclosure of  
2 data contractual agreements that limit such access for investigators

3 **The final dataset will be analyzed by the blinded trial collaborators and**  
4 **co-investigators at Berry Consultants, LLC who specialize in Bayesian**  
5 **statistical analysis and adaptive platform trial design. Data are shared**  
6 **only within the specifications of the a priori data sharing agreement.**  
7 **Data within the biorepository will be accessible by all trial investigators**  
8 **in compliance with Clinical Research Standards at University of**  
9 **Pittsburgh and as approved by the institutional review board.**

10  
11 Ancillary and 30 Provisions, if any, for ancillary and post-trial care, and for compensation to  
12 post-trial care those who suffer harm from trial participation

13  
14 **The following information is provided within the informed consent**  
15 **document and will be followed if necessary:**

16  
17  
18 **“If you believe that the research procedures have resulted in an injury**  
19 **to you, immediately contact the Principal Investigator who is listed on**  
20 **the first page of this form. Emergency medical treatment for injuries**  
21 **solely and directly related to your participation in this research study**  
22 **will be provided to you by the hospitals of UPMC. Your insurance**  
23 **provider may be billed for the costs of this emergency treatment, but**  
24 **none of those costs will be charged directly to you. If your research-**  
25 **related injury requires medical care beyond this emergency treatment,**  
26 **you will be responsible for the costs of this follow-up care. At this time,**  
27 **there is no plan for any additional financial compensation. You do not,**  
28 **however, waive any legal rights by signing this form.”**

29  
30 Dissemination 31a Plans for investigators and sponsor to communicate trial results to  
31 policy participants, healthcare professionals, the public, and other relevant groups  
32 (eg, via publication, reporting in results databases, or other data sharing  
33 arrangements), including any publication restrictions

34  
35 **The results of this trial will be published in a peer reviewed article**  
36 **following the completion of the trial. No personal results will be shared**  
37 **with the participants. No patient level data will be shared. Summarized**  
38 **data, as outlined in the Statistical Analysis Appendix, will be provided**  
39 **for future potential meta-analysis.**

40  
41  
42 **In particular, treatment effects will be summarized from the model as a**  
43 **common odds ratio across surgical subtypes, as well as translated into**  
44 **expected mean differences in HFD for each surgical subtype enrolled in**  
45 **the trial. These treatment effect estimates will be from the Bayesian**  
46 **primary analysis model that allows for borrowing of information across**  
47 **doses and durations of the treatment. We will report raw mean (and SD)**  
48 **differences in HFD for each surgical subtype, under each dose and**  
49 **duration. These raw estimates will not take into account the borrowing**  
50 **of information across doses and durations and should be compatible**  
51 **with other trial publications for use in future meta-analyses.**

52  
53 31b Authorship eligibility guidelines and any intended use of professional writers

54  
55 **Authorship guidelines will be followed based upon the journal**  
56 **accepting and publishing the trial results.**

1  
2  
3  
4  
5  
6  
7  
8  
9  
10  
11  
12  
13  
14  
15  
16  
17  
18  
19  
20  
21  
22  
23  
24  
25  
26  
27  
28  
29  
30  
31  
32  
33  
34  
35  
36  
37  
38  
39  
40  
41  
42  
43  
44  
45  
46  
47  
48  
49  
50  
51  
52  
53  
54  
55  
56  
57  
58  
59  
60

31c Plans, if any, for granting public access to the full protocol, participant level dataset, and statistical code

**Patient level data will not be shared publicly. The investigators may share the full protocol (if specifications beyond the published protocol manuscript are desired) and/or statistical code to provide result clarity and this will be considered on a case by case basis.**

## Appendices

Informed consent materials

32 Model consent form and other related documentation given to participants and authorised surrogates

**A sample consent form is provided as an appendix to this manuscript (Appendix 4).**

Biological specimens

33 Plans for collection, laboratory evaluation, and storage of biological specimens for genetic or molecular analysis in the current trial and for future use in ancillary studies, if applicable

**In order to provide a library for future biological testing and sampling, SPRY-Metformin is creating a biorepository including a maximum of 5 blood samples (contact points 1, 3 [POD 0-3], and 4) throughout the trial (Figure 4). Patients discharged prior to POD 3 will have the fourth blood sample collected only if a venous blood sample is clinically indicated on the day of discharge. The biorepository includes the collection of peripheral blood mononuclear cells, plasma, and planned collections for DNA, RNA, and metabolomic analysis. Substudy patients will provide additional biorepository samples: microbiome (stool samples contact point 2, 3 [intraoperative rectal swab], 4, and 5) and muscle biopsy (contact point 3 [intraoperative] and contact point 6). Microbiome samples will be captured and preserved with the Zymo DNA/RNA Fecal Collection Kit (Zymo Research, Irvine, CA).**



## References

- 1 Madsen KS, Kähler P, Kähler LKA, *et al.* Metformin and second-or third-generation sulphonylurea combination therapy for adults with type 2 diabetes mellitus. *Cochrane Database Syst Rev* 2019;**2019**. doi:10.1002/14651858.CD012368.pub2
- 2 Pasquel FJ, Klein R, Adigweme A, *et al.* Metformin-Associated Lactic Acidosis. *Am J Med Sci* 2015;**349**:263–7. doi:10.1097/MAJ.0b013e3182a562b7
- 3 Peña Porta JM, Villafuerte Ledesma HM, Vicente de Vera Floristán C, *et al.* Incidence, factors related to presentation, course and mortality of metformin-associated lactic acidosis in the healthcare area of a tertiary hospital. *Nefrologia* 2019;**39**:35–43. doi:10.1016/j.nefro.2018.04.012
- 4 Xu W, Deng YY, Yang L, *et al.* Metformin ameliorates the proinflammatory state in patients with carotid artery atherosclerosis through sirtuin 1 induction. *Transl Res* 2015;**166**:451–8. doi:10.1016/j.trsl.2015.06.002
- 5 Caballero AE, Delgado A, Aguilar-Salinas CA, *et al.* The differential effects of metformin on markers of endothelial activation and inflammation in subjects with impaired glucose tolerance: A placebo-controlled, randomized clinical trial. *J Clin Endocrinol Metab* 2004;**89**:3943–8. doi:10.1210/jc.2004-0019
- 6 Goodwin PJ, Stambolic V, Lemieux J, *et al.* Evaluation of metformin in early breast cancer: a modification of the traditional paradigm for clinical testing of anti-cancer agents. *Breast Cancer Res Treat* 2011;**126**:215–20. doi:10.1007/s10549-010-1224-

1

## Statistical Analysis Appendix and Adaptive Design Report for SPRY-Metformin Domain

---

### 1.0 Introduction

SPRY-Metformin is a randomized control trial comparing the effectiveness of different doses and durations of metformin to placebo for nondiabetic patients with elective surgeries. In particular, we will evaluate 3 doses of metformin (500, 1000 and 1500mg) as well as 3 levels of pre-op duration of metformin (short, 7-28 days; intermediate, 29-90 days; and long, 90 days). Patients will be randomized to one of the three metformin doses or placebo but will not be randomized to the pre-op duration. Pre-op duration will be observed based on the timing of the first pre-op visit.

The primary endpoint to determine efficacy of metformin relative to placebo is hospital free days (HFD) at day 90 after the surgical encounter after administration of metformin vs. placebo. HFD at day 90 is an ordered categorical variable that takes on discrete integer values from -1 to 90 and is calculated as 90 minus the number of days of the index stay and the number of days readmitted within the 90-day time period following the surgical encounter. If mortality occurs within the 90-day time period, the patient is given an HFD value of -1 (ordered to be a worse outcome than being in the hospital for all 90 days).

There will be a maximum of 2000-2500 patients randomized in the trial. Within each of the 3 pre-op durations, patients will initially be randomized  $\sqrt{3}:1:1:1$  to placebo and the 3 doses of metformin until a total of 500 patients have been randomized across all pre-op durations and followed for 90 days. Afterwards, interim analyses will occur sequentially after an additional 500 patients have been followed for 90 days. At each interim analysis, the trial can be stopped early for demonstrating efficacy of one of the metformin doses compared to placebo (see Section 3.1). If the trial has not stopped for success and continues enrolling, within each pre-op duration doses can be dropped for futility and responsive adaptive randomization will be used to randomize patients preferentially to the best performing metformin doses of all of the remaining doses within that pre-op durations (see Sections 3.2-3.3). The trial can stop enrolling patients within a pre-op duration if all metformin doses have been stopped within that duration for futility (see Section 3.2). Finally, at the interim when 2000 patients have been randomized across all pre-op durations and followed for 90 days, the maximum sample size could be increased from 2000 to 2500 (see Section 3.4).

### 2.0 Statistical Modeling

Inferences and quantities of interest used for response adaptive randomization, success or futility of metformin doses, and increasing the maximum sample size in this trial are based a Bayesian ordinal logistic regression model. The ordinal logistic regression model

accounts for underlying differences in the expected 90-day HFD distribution depending on surgical procedure or strata of the patient but assumes a common odds ratio treatment effect across the surgical strata. The odds ratio shift within an ordinal logistic regression model can be thought of similarly to an odds ratio within a logistic regression analysis of a dichotomous endpoint. Within ordinal logistic regression, we are simply performing multiple logistic regression analyses (one for each possible dichotomization of the data) and providing a weighted average of the odds ratios across these different dichotomizations. The assumption of a common odds ratio treatment effect across the different surgical subtypes translates into different absolute differences in the mean hospital free days within each surgical strata. For a common odds ratio across surgical strata, the larger the expected HFD within the strata the smaller the absolute mean difference in HFD between treatment and control.

In this setting, the Bayesian analysis makes use of non-informative prior distributions with regards to HFD distributions for each surgical strata and in this regard is very similar in nature to a frequentist ordinal logistic analysis. However, we chose to use a Bayesian analysis over a frequentist approach to allow for borrowing of information on the treatment effect across different doses and durations. This borrowing is done in the Bayesian setting by placing a hierarchical prior distribution on the treatment effects across all doses, all durations and the interactions between them.

### 2.1 Bayesian Ordinal Logistic Regression

Throughout we assume for patient  $i$ ,  $Y_i$  is the observed 90-day HFD,  $g(i)$ , is the surgical strata from 1:G,  $d(i)$  is the pre-op duration from 1:3 with 1 = short, 2 = intermediate, and 3=long, and  $t(i)$  is the intervention from 1:4 with 1 = placebo, 2 = 500mg, 3 = 1000mg, and 4 = 1500mg.

A Bayesian ordinal logistic regression model is used to estimate the effect of dose and duration of metformin on the distribution of HFD under placebo adjusting for expected differences given the surgical type/strata. The ordinal scale parameterization is a generalized version of the dichotomous parameterization where we model all cumulative probabilities of 90-day HFD being less than or equal to a cut point  $c$ , where  $c = -1, \dots, 89$ . Given each cut point  $c$ , we denote the 91 dichotomized versions of 90-day HFD for patient  $i$  as  $Y_{c,i}$  where  $Y_{c,i} = 1$  if 90-day HFD is in  $[-1, c]$  and  $Y_{c,i} = 0$  if 90-day HFD is in  $[c+1, 90]$  for  $c = -1, \dots, 89$ .  $Y_{c,i}$  is then modeled throughout as:

$$Y_{c,i} \sim \text{Bernoulli}(\phi_{c,i}), c = 1 \dots 89;$$

$$\text{logit}(\phi_{c,i}) = \gamma_c + \mu_i;$$

where  $\mu_i$  is a patient-specific mean function and  $\gamma_c$  is common across all patients.

The subject-specific mean function is as follows:

$$\mu_i = \alpha_{g(i)} + \theta_{t(i),d(i)}, i = 1 \dots N.$$

1  
2  
3 Within this model we assume that the underlying distribution of HFD is different within  
4 each stratum,  $g$ , and these differences across strata can be explained by a proportional  
5 log-odds ratio shift in the HFD distribution,  $\alpha_g$ . Furthermore, we assume that the effects  
6 of each intervention within each pre-op duration are constant across strata and can be  
7 explained by a proportional log-odds ratio shift in the HFD distribution  $\theta_{t,d}$ . Where a log-  
8 odds ratio  $\theta_{t,d} < 0$  results in an increase in expected HFD. For identifiability we assume  
9 the effect of placebo across all durations is zero,  $\theta_{1,d} = 0$  for all  $d = 1:3$ . As such, the  
10 values of the inverse logit of  $\gamma_c$  define the cumulative probabilities for each HFD value  
11 under placebo, common across pre-op durations, and averaged across all strata. For all  
12 doses of metformin, we assume that the log-odds ratio of the effect of the dose is  
13 dependent on the pre-op duration and takes on the following form:  
14  
15

$$16 \theta_{t,d} = \beta_t + \kappa_d + \delta_{t,d} \text{ for } t > 1, t = 1 \dots 4, d = 1 \dots 3.$$

17  
18 Here,  $\beta_t$  is the log-odds ratio due to the dose,  $\kappa_d$  is the log-odds ratio due to the duration  
19 and  $\delta_{t,d}$  is an interaction between dose and duration.  
20  
21  
22  
23

## 24 2.2 Model Priors

25  
26 The prior distribution of  $\gamma_c$  is specified on the probability scale:  
27  
28

$$29 \pi \sim \text{Dirichlet}(\alpha_{-1}, \dots, \alpha_{90});$$

$$30 \gamma_c = \text{logit} \left( \sum_{i=-1}^c \pi_i \right), c = 1 \dots 89;$$

31  
32 with hyper-parameters,  $\alpha_h$ , specified based on the observed rates of HFD across all strata  
33 in pre-trial data (discussed in Section 4) and providing 1 patient worth of information so  
34 that  $\sum_{h=-1}^{90} \alpha_h = 1$ .  
35  
36  
37

38 For the strata-specific log-odds ratios we place a normal prior distribution with mean 0  
39 and standard deviation 2:  
40

$$41 \alpha_g \sim N(0, 2^2), g = 1 \dots G.$$

42  
43 Within pre-trial data (discussed in Section 4), the standard deviation of the log-odds  
44 ratios across surgical types/strata was estimated to be 1.5.  
45

46 We assume a hierarchical distributions for the dose-effects and duration-effects each  
47 centered around a common mean so there is borrowing of information across doses and  
48 durations:  
49

$$50 \beta_t \sim N(\mu_\beta, .5^2); \mu_\beta \sim N(0, 1), t = 1 \dots 4;$$

$$51 \kappa_d \sim N(\mu_\kappa, .5^2); \mu_\kappa \sim N(0, 1), d = 1 \dots 3.$$

Finally, we assume that the interaction between dose and duration has a normal prior distribution with mean 0 and standard deviation .2 to limit the amount of deviation of the overall effect,  $\theta_{t,d}$ , from the two additive effects.

### 2.3 Quantities of Interest

The following statistical quantities are used in the design of the trial and will be summarized at the conclusion of the trial. The posterior distribution of all model parameters is calculated using MCMC. The algorithm allows the generating of M (ex. 100,000) draws from the joint posterior distribution for all model parameters.

#### 2.3.1 Summaries of Treatment Effect

The effect of each dose,  $t$ , and duration,  $d$ , will be summarized by reporting the posterior mean and 95% CI of the odds ratio,  $\exp(\theta_{t,d})$ , (common across all surgical strata). Additionally, we will translate the posterior mean odds ratio into expected mean differences in HFD for each surgical subtype enrolled in the trial. Finally, we will report raw mean (and SD) differences in HFD for each surgical subtype, under each dose and duration. These raw estimates will not take into account the borrowing of information across doses and durations.

#### 2.3.2 Probability beat placebo by CSD

To determine if a dose should be dropped within a duration or if we should increase the sample size at N=2000, we summarize the posteriority probability that each dose,  $t$ , and duration,  $d$ , of metformin is superior to placebo by some clinically significant difference (CSD). The CSD is defined as an odds ratio of .8. Thus, we are interested in the probability  $\exp(\theta_{t,d}) < .8$ . This quantity is calculated from the M samples of the posterior distribution of the effect of each dose and duration,  $\theta_{t,d}$ , by reporting the proportion of posterior samples in which the odds ratio,  $\exp(\theta_{t,d})$  is less than .8:

$$\Pr(\exp(\theta_{t,d}) < .8 | Y) = \frac{1}{M} \sum_{m=1}^M (\exp(\theta_{t,d}) < .8), t = 1 \dots 4, d = 1 \dots 3.$$

#### 2.3.4 Probability of Optimal Dose within each Duration

Within a pre-op duration, we will use response adaptive randomization to allocate the next set of patients to all doses that have not been stopped for futility based the posterior probability that each dose is optimal within each pre-op duration. This quantity is calculated from the M samples of the posterior distribution of the effect of each dose within each duration,  $\theta_{t,d}$ , by reporting the proportion of posterior samples in which the log odds ratio for dose  $t$ ,  $\theta_{t,d}$  is the min observed effect across all three metformin doses  $t=2:4$  with duration  $d$ :

$$O(t, d) = \frac{1}{M} \sum_{m=1}^M I[\theta_{t,d} < \theta_{j,d} \text{ for all } j \neq t], t = 1 \dots 4, d = 1 \dots 3.$$

### 2.3.5 Probability of Superiority

To determine if the trial should stop early for success at any interim or if the trial is successful at the final analysis, we summarize the posteriority probability that each dose of metformin is superior to placebo. For the superiority analysis, we estimate the effect of each dose of metformin by pooling across all actively enrolling durations. This is achieved by using the model described in Section 2.1 with the additional assumption that  $\theta_t = \theta_{t,1} = \theta_{t,2} = \theta_{t,3}$ . The posterior distribution of the pooled effect of each dose,  $\theta_t$ , is this estimated by calculating M samples of the posterior distribution using only data from the actively enrolling doses within each duration. The probability of superiority of each dose relative to placebo is then calculated as the proportion of the M samples with  $\theta_t$  less than zero:

$$\Pr(\theta_t < 0 | Y) = \frac{1}{M} \sum_{m=1}^M \theta_t < 0, t = 1 \dots 4.$$

### 2.4 Missing Data

All missing data will be imputed based upon the median observed 90-day HFD value for each treatment arm and preoperative duration. Sensitivity analyses will utilize the following different imputation strategies that do not assume missing at random (MAR):

- Impute all missing values as the median observed 90-day HFD value under the placebo group.
- Impute all missing values as the worse observed 90-day HFD value within that surgical strata.

### 2.5 Heterogeneity of Treatment Effects

The heterogeneity of treatment effects across different key patient subgroups will be explored by allowing the common odds ratio per dose and duration,  $\exp(\theta_{t,d})$ , to be subgroup dependent. Subgroups of interest include: Surgical specialty (see Table 4.1), operative stress level as defined by the Operative Stress Score,<sup>1</sup> surgical subtype, age category, and frailty based upon the prospectively calculated Revised Analysis Index.

## 3.0 Interim Analyses and Trial Adaptations

Before interim analyses begin, patients will be randomized  $\sqrt{3}:1:1:1$  to placebo and the three doses of metformin within each pre-op duration. Interim analyses will then begin when 500 total patients across all doses and durations are randomized and have been followed for 90 days and will continue after every additional 500 patients have been

followed for 90 days. Thus, there are 4 total interims at 500, 1000, 1500, and 2000 patients with 90-day follow-up and a final analysis when 2500 patients have been followed for 90 days. At each interim we allow the following adaptations:

- Success
- Dose / Duration Dropping
- Response Adaptive Randomization

### 3.1 Success

Success will be declared at an early interim or at the final analysis, and the trial will stop if the posterior probability of superiority of any dose of metformin relative to placebo defined in Section 2.3.3 is greater than a pre-defined interim-specific threshold. The thresholds for each interim are reported in Table 3.1.1 and are based on an O'Brien Fleming spending function assuming a maximum sample size of 2500:

| Analysis                 | 500   | 1000  | 1500  | 2000  | 2500  |
|--------------------------|-------|-------|-------|-------|-------|
| <i>Success Threshold</i> | .9999 | .9999 | .9985 | .9950 | .9894 |

### 3.2 Dose / Duration Dropping

Metformin doses will be dropped within a duration based on the probability of futility defined in Section 2.3.1. Specifically, for dose  $t$  in duration  $d$  if

$$\Pr(\exp(\theta_{t,d}) < .8 \mid Y) < .15, t = 1 \dots 4, d = 1 \dots 3;$$

dose  $t$  will be dropped in duration  $d$  and patients within that duration will no longer be randomized to that dose.

We require an additional order restriction on dose dropping so that a dose must be dropped first in the short duration, then the intermediate duration then the long. Therefore, a dose cannot be dropped in the intermediate duration until it has first been dropped in the short and cannot be dropped in the long duration until it has first been dropped in the short and intermediate.

Enrollment to a pre-op duration will be stopped if all doses within that duration have been stopped and the trial will stop for futility if all pre-op durations have been stopped.

### 3.3 Response Adaptive Randomization within Durations

1  
2  
3 Within each pre-op duration of metformin, we will use response adaptive randomization  
4 to allocate patients to the most optimal dose of metformin within that pre-op duration.  
5 Initial randomization is set to  $\sqrt{3}:1:1:1$  to placebo and the 3 doses of metformin within  
6 each duration. This allocates approximately .366 percent of the patients to placebo. This  
7 percentage allocation to placebo will be maintained throughout the course of the trial.  
8 However, after the first interim analysis, the remaining .634 percent of patients will be  
9 allocated to metformin doses within each duration that have not been dropped for futility  
10 and preferentially based on the probability that the dose is optimal within the duration  
11 defined in Section 2.3.2 and renormalized over the currently enrolling doses.  
12  
13

### 14 **3.4 Increasing maximum sample size to 2500**

15  
16  
17 At the interim analysis when 2000 patients are randomized and followed for 90 days the  
18 maximum sample size will increase to 2500 if at least one dose within one pre-op  
19 duration meets the following criteria:  
20

$$21 \Pr(\exp(\theta_{t,d}) < .8 \mid Y) > .50, t = 1 \dots 4, d = 1 \dots 3.$$

22  
23  
24 After 2000 patients have been randomized and are waiting to be followed for 90 days,  
25 enrollment will continue until the interim analysis takes place. If the above criteria is met,  
26 enrollment will continue to a maximum of 2500. If the above criteria is not met,  
27 enrollment will stop.  
28  
29

## 30 **4.0 Clinical Trial Simulations**

31  
32 Clinical trial simulations are used to provide example trial results, to optimize clinical  
33 trial design (best thresholds for early success, dose dropping, and futility stopping) and to  
34 determine the sample size needed within this trial to obtain at least 80% power for a  
35 clinically meaningful treatment effect and a one-sided 2.5% type I error under the null  
36 distributions. Simulations were provided under a wide range of clinical trial parameters to  
37 optimize the design with the design team. Operating characteristics are provided for the  
38 final design herein.  
39  
40

41 To create realistic clinical trial simulations, we obtained pre-trial data from patients  
42 within the UPMC electronic health records who had received an in-patient elective  
43 surgery and met the additional inclusion/exclusion criteria:  
44  
45

- 46 • Inclusion:
  - 47 ○ Age > 60 or RAI > 30 or CCI > 2
  - 48 ○ Surgery performed in either PUH or SHY hospitals
- 49 • Exclusion:
  - 50 ○ Diabetes or previous metformin use
  - 51 ○ Had one of the following surgery types:
    - 52 ■ Minimally invasive cholecystectomy
    - 53 ■ Irrigation and debridement of a wound
    - 54 ■ Hyst. Total abdomen



- Vaginal Hyst.
- Sleeve Gast.

This resulted in data from 16,932 patients across 376 surgery types. Table 4.1 provides summaries of the data by clustering each surgery type into one of 14 surgical specialties. In particular, for each surgical specialty we report: total number of patients, total number of surgical types, mean and median HFD, and 90-day mortality rates.

|              | <b>Total N</b> | <b>Surgical Procedures/ Strata</b> | <b>Mean HFD</b> | <b>Median HFD</b> | <b>Mort. Rate</b> |
|--------------|----------------|------------------------------------|-----------------|-------------------|-------------------|
| <b>Total</b> | <b>16832</b>   | <b>376</b>                         | <b>79.5</b>     | <b>86.0</b>       | <b>0.05</b>       |
| ORTHO        | 3849           | 72                                 | 83.2            | 87.0              | 0.03              |
| SPINE        | 2884           | 25                                 | 83.6            | 87.0              | 0.02              |
| CARDIAC      | 1979           | 34                                 | 75.5            | 83.0              | 0.07              |
| GENERAL      | 1692           | 52                                 | 70.9            | 82.0              | 0.10              |
| UROLOGY      | 1221           | 21                                 | 85.2            | 88.0              | 0.01              |
| THORACIC     | 1130           | 35                                 | 76.7            | 84.0              | 0.06              |
| NEURO        | 1099           | 35                                 | 78.0            | 87.0              | 0.08              |
| VASCULAR     | 1043           | 39                                 | 77.7            | 86.0              | 0.07              |
| HPB          | 729            | 16                                 | 78.6            | 84.0              | 0.03              |
| COLORECTAL   | 707            | 20                                 | 77.0            | 84.0              | 0.04              |
| ENT          | 334            | 8                                  | 79.6            | 86.0              | 0.04              |
| TRANSPLANT   | 136            | 8                                  | 71.0            | 81.5              | 0.01              |
| GYNE         | 15             | 7                                  | 80.1            | 86.0              | 0.07              |
| BARIATRIC    | 14             | 4                                  | 73.3            | 80.0              | 0.07              |

#### **4.1 Virtual Patient Simulation**

Within each simulation, we assumed that the SPRY trial would enroll subjects from all strata that had at least 50 subjects in the pre-trial data (77 total) with the proportion of patients within each enrolling stratum estimated from the pre-trial data. We also assume that the HFD distribution per strata under placebo is the same as what was observed in the pre-trial data. Finally, we assume treatment effects for each metformin dose can be summarized as a common percent reduction in the mean hospital days (HD) across all strata. This treatment effect is assumed to be 0% for all null scenarios and a maximum of 15% for all alternative scenarios.

The trial was powered assuming a common treatment effect of 15% reduction in mean hospital days across all surgical subtypes. The common treatment effect is specified as a percent reduction in mean hospital days to help elicit the minimal clinically meaningful treatment effect from the trial design team. The reduction of 15% in hospital days is thought to be the minimal clinically meaningful treatment effect within this patient population. This common percent reduction across surgical subtypes, results in different absolute effects in mean hospital days depending on the surgical subtype (see Table 4.2). In particular, for one of the most common surgical subtypes of Total Knee Arthroplasty, this would result in a half of a day reduction in hospital days (3.4 days in hospital vs. 2.9

days). In comparison, under Endovascular aortic repair, the expected reduction in hospital days is 1.6 (10.8 days in hospital vs. 9.2 days). A percent reduction that that is at least 15% would result in a savings ranging from 0.2 – 3.9 hospital days for the 10 most common surgical types.

To obtain a common percent reduction in mean HD across all strata within our simulations, we find the strata-specific odds ratio shift under treatment relative to the empirical HFD distribution under placebo that results in the assumed common percent reduction in HD per strata.

For example, Figure 4.1 plots the assumed HFD distribution under placebo and under a 15% reduction in HD for the most common surgical type, Total knee arthroplasty. Within the pre-trial data there were 1115 patients who received a total knee arthroplasty. The empirical HFD distribution observed in the pre-trial patients and assumed for placebo within this stratum is plotted in blue with approximately 10% of patients having 89 HFD, 35% with 88 HFD and 29% with 87 HFD. Across all patients, the mean HFD is 86.6. To achieve a treatment effect of a 15% reduction in HD (plotted in green) we would need an odds ratio shift in the treatment distribution relative to placebo of .62. This would result in a mean reduction in HD of .5. This would shift approximately 15% of patients under treatment to 89 HFD, 42% to 88 HFD and 25% to 87 HFD.

Similar summaries for the 10 most common surgical types are provided in Table 4.2.

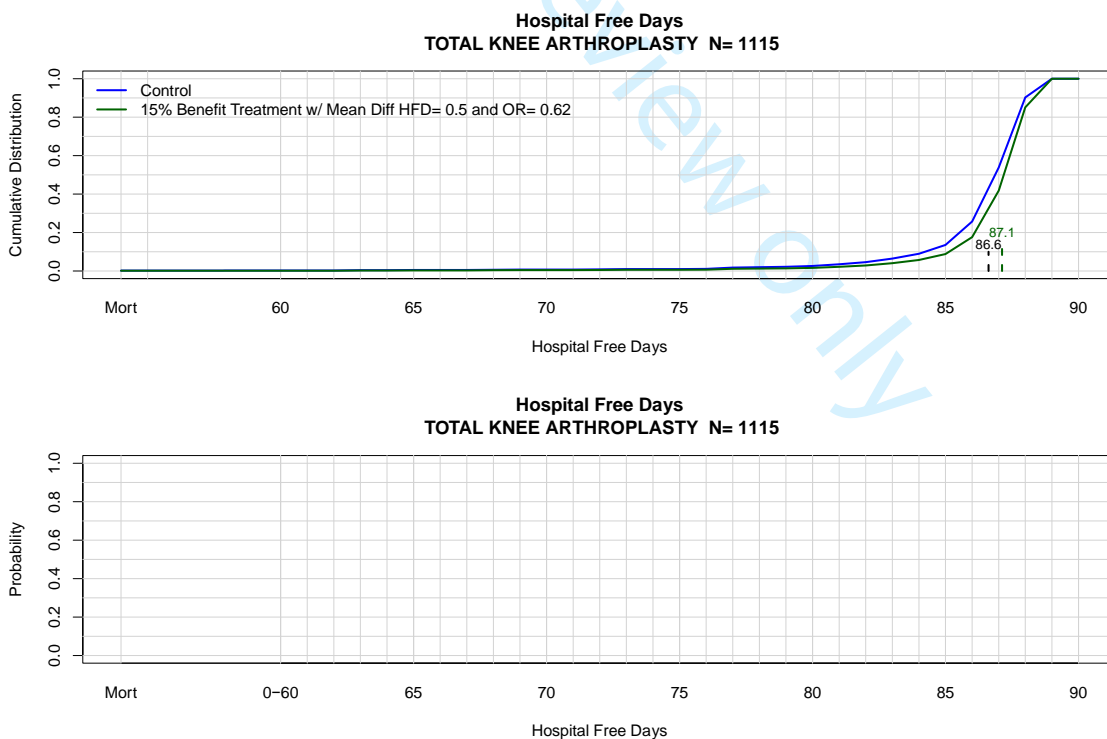

Figure 4.1: Example Strata-Specific HFD distribution under placebo vs. treated with a 15% reduction in HD for Total Knee Arthroplasty.

**Table 4.2: Summary of Control Distributions and Treatment effects for 10 most common surgical types.**

|                                       | Prop. Overall | Mean HFD Control | Mean Diff. Under Common 15% Reduction in HD | Odds-Ratio Shift Under Common 15% Reduction in HD |
|---------------------------------------|---------------|------------------|---------------------------------------------|---------------------------------------------------|
| Total Knee Arth.                      | 0.08          | 86.6             | 0.5                                         | 0.62                                              |
| Spine Post. Fuse Internal Fix.        | 0.07          | 82.8             | 1.1                                         | 0.71                                              |
| Total Hip Arth.                       | 0.05          | 85.6             | 0.7                                         | 0.72                                              |
| Endo. Aortic Valve Replace            | 0.03          | 79.2             | 1.6                                         | 0.78                                              |
| Spine Ant. Cervical Dissect. and Fuse | 0.03          | 86.2             | 0.6                                         | 0.77                                              |
| Spine Post. Lumbar or Thoracic        | 0.03          | 84.7             | 0.8                                         | 0.77                                              |
| MIS Partial Pulmonary Lobectomy       | 0.02          | 83.2             | 1.0                                         | 0.73                                              |
| Prostatectomy Lap. Robotic Assist.    | 0.02          | 88.6             | 0.2                                         | 0.50                                              |
| Laparotomy                            | 0.02          | 64.1             | 3.9                                         | 0.76                                              |
| Total Hip MIS 2 Incisions             | 0.02          | 88.0             | 0.2                                         | 0.76                                              |

## 5.0 Example Trials

We provide example data and results for two simulated example trials. In particular, for each interim in each example trial we provide a plot of the data and results (ex. Figure 5.1.1). Each plot shows the following:

- Top Left: Allocation to each dose and the number of patients within each duration for each dose.
- Top Middle: Mean estimates (circles) and CI for the ORs for each dose and duration of metformin as well as pooled for each dose (above the P and in grey) across all actively enrolling durations. The confidence intervals show the lower .15 quantile so that if the lower bar goes above .8 the dose may stop for futility and the upper Xth quantile where X is interim specific success threshold based on the success rules provided in Table 3.1.1 so that if the upper bar goes below 1 for the pooled estimate, the dose will be declared a success. Raw OR values are provided plotted as stars.
- Top Right: The new allocation probabilities within each duration for placebo and the 3 metformin doses.
- Bottom: Cumulative probabilities of observing each HFD value or less for Placebo and each dose of metformin averaged across all durations and separately within each duration. As the curves move down and to the right, the expected HFD is increasing and the number of expected HD is decreasing.

5.1 Example Trial 1

Figure 5.1.1 shows results from the first interim analysis when 500 patients have 90-day data. Approximately 200 patients have been allocated to placebo and 100 to each of the 3 metformin doses. Estimates for the OR of all doses (500, 1000 and 1500) given at the short duration are 1.2 or greater, all have a posterior probability that the OR < .8 less than 15%, and all are stopped for futility. Thus, the trial stops enrolling in the short duration. All doses are still enrolling in the medium and long durations. Within the intermediate duration the 1500mg dose has an OR estimated around .75, and the 1000 and 500mg have an OR estimated around .85. Therefore, the new allocation probabilities are weighted towards the 1500mg dose within the intermediate duration. Within the long duration the 1500 and 1000mg doses have an OR estimated around .6 and are preferentially allocated to over the 500mg dose which has an estimated OR of .85.

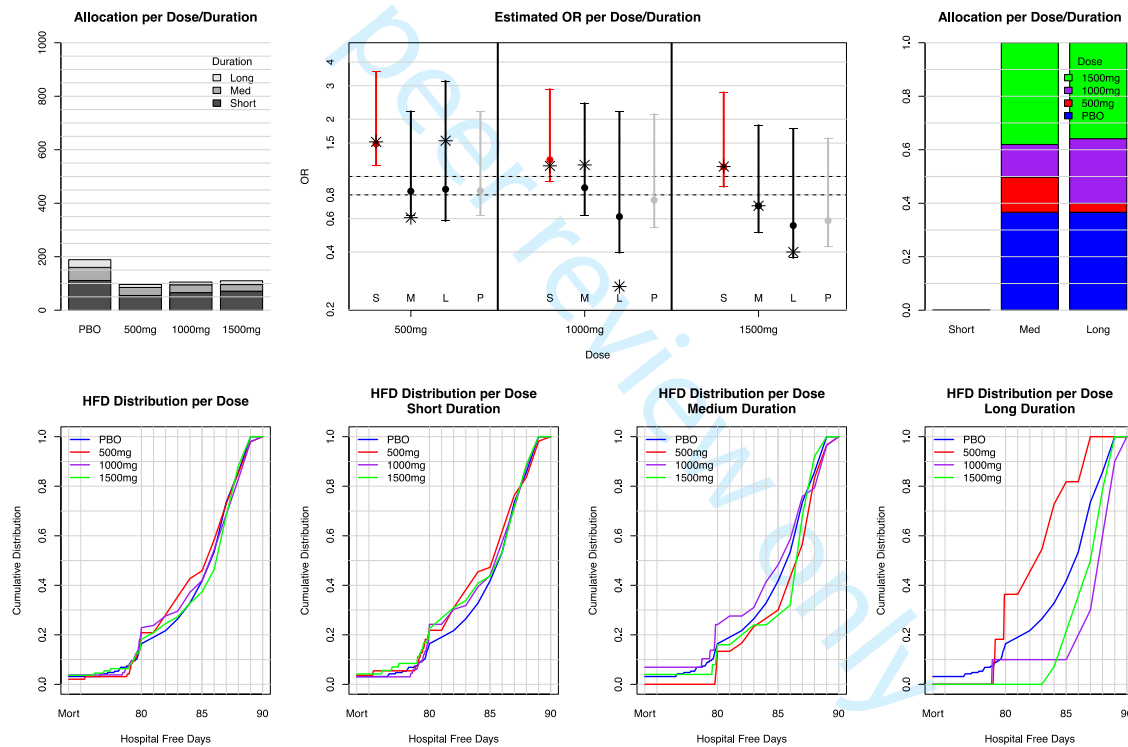

Figure 5.1.1: Example Trial 1; Interim N=500

Figure 5.1.2 shows results from the second interim analysis when 1000 patients have 90-day data. Approximately 375 patients have been allocated to placebo, 150 to 500mg, 200 to 1000mg and 300 to 1500mg. No new patients have been enrolled in the short duration. Within the intermediate duration the 1500mg dose has an OR estimated around .70, and the 1000 and 500mg have an OR estimated around .90. Therefore, the new allocation probabilities are weighted towards the 1500mg dose and away from the 1000 and 500mg dose within the intermediate duration. Within the long duration the 1500mg and 1000mg doses have an OR estimated around .65 and .75 respectively and are preferentially allocated to over the 500mg dose which has an estimated OR greater than 1. The 500mg dose in the long duration has less than a 15% posterior probability of having an OR < .8. However, it is not stopped since the intermediate duration has not stopped yet for this dose.

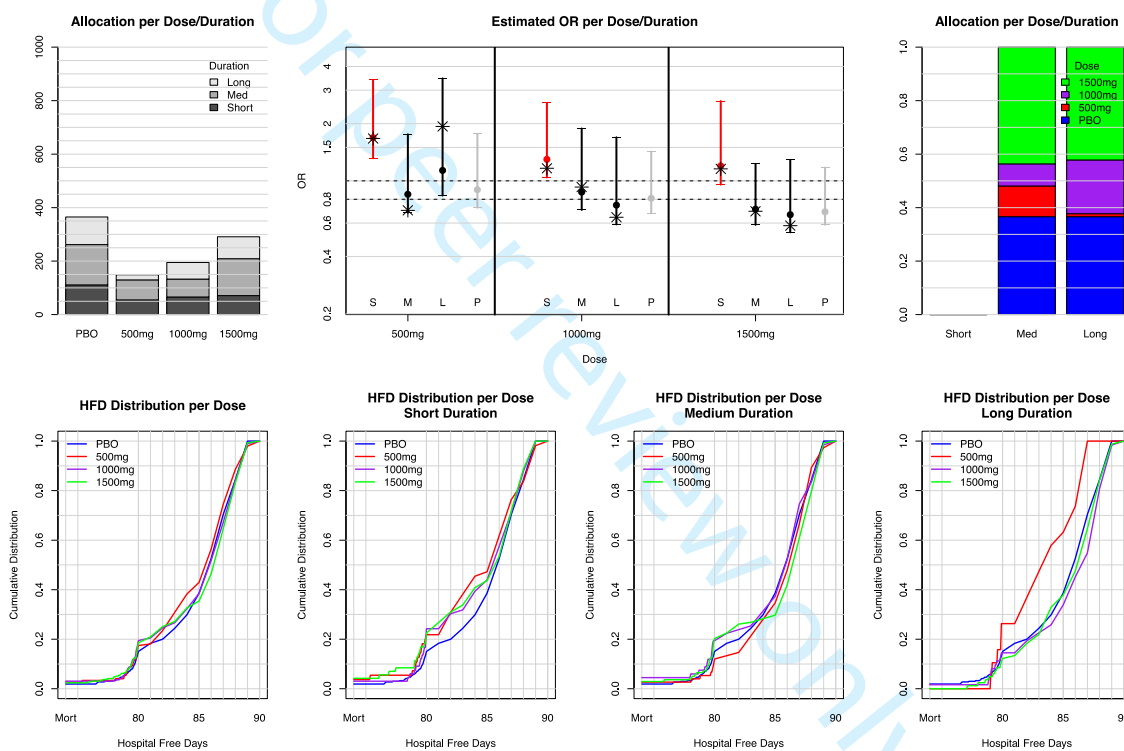

Figure 5.1.2: Example Trial 1; Interim N=1000

Figure 5.1.3 shows results from the third interim analysis when 1500 patients have 90-day data. Approximately 550 patients have been allocated to placebo, 200 to 500mg, 250 to 1000mg and 500 to 1500mg. No new patients have been enrolled in the short duration. The 500mg dose is stopped in both the intermediate and long durations. Within the intermediate and long durations, the 1500 and 1000mg doses have an OR estimated around .80 and have approximately equal allocations within each duration.



Figure 5.1.3: Example Trial 1; Interim N=1500

Figure 5.1.4 shows results from the fourth interim analysis when 2000 patients have 90-day data. Approximately 725 patients have been allocated to placebo, 200 to 500mg (no new patients), 425 to 1000mg and 675 to 1500mg. No new patients have been enrolled in the short duration. The pooled estimate across all actively enrolling durations (intermediate and long) for the 1000mg dose is approximately .75 and the upper limit of the CI has dropped below 1. Therefore, the posterior probability that the OR<1 for the 1000mg dose is greater than the interim-specific threshold (.995) and the study is stopped for success.

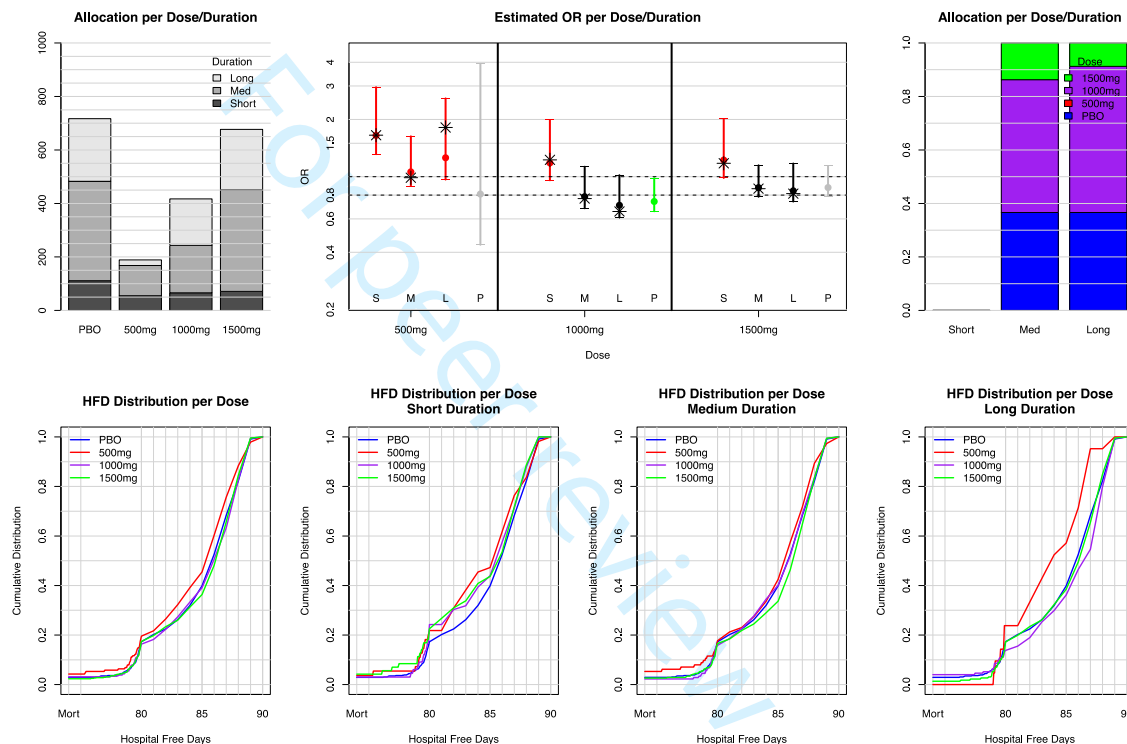

Figure 5.1.4: Example Trial 1; Interim N=2000

5.2 Example Trial 2

Figure 5.2.1 shows results from the first interim analysis when 500 patients have 90-day data. Approximately 200 patients have been allocated to placebo and 100 to 500, 1000 and 1500mg each. Within the cumulative distribution plots, the curves for each dose of metformin within each duration are mostly to the left and above the curve for placebo, indicating less HFD for each dose in each duration relative to placebo. For all doses within all durations the OR is estimated to be greater than 1.3 and the posterior probability that the OR < .8 is less than 15%. Thus, the trial stops for futility at the first interim analysis.

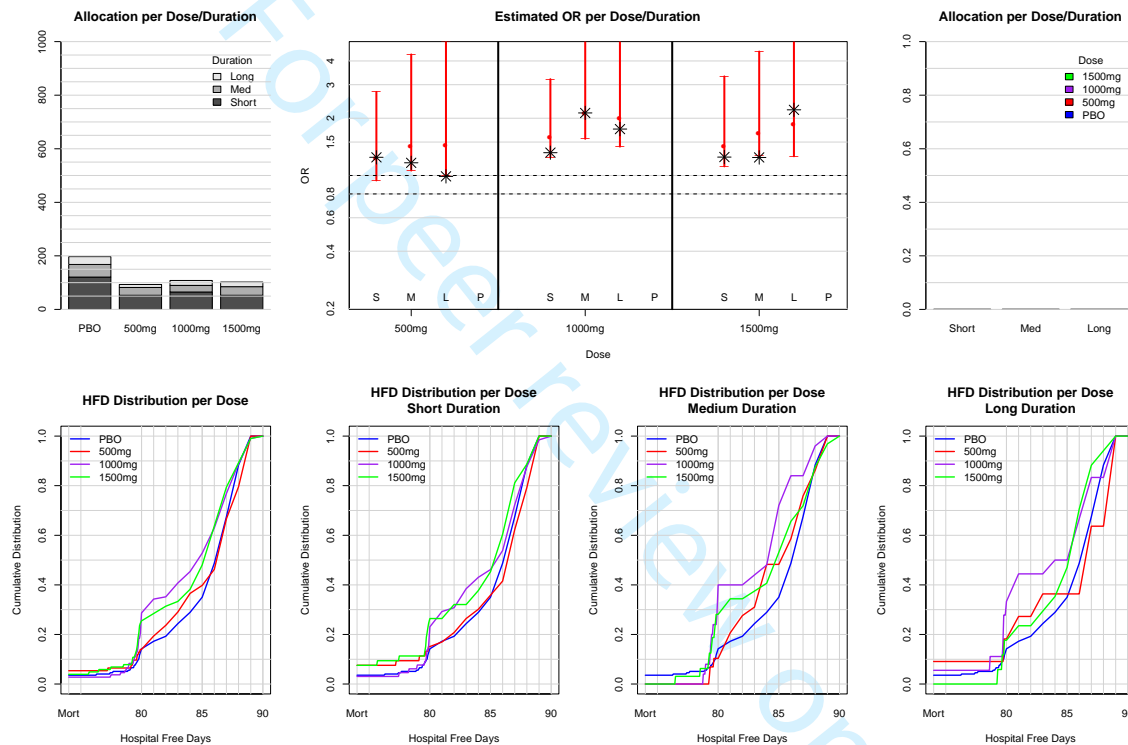

Figure 5.2.1: Example Trial 2; Interim N=500



## 6.0 Operating Characteristics

We simulate clinical trials under 7 possible treatment effect scenarios. Under the null scenario we assume that there is a 0% reduction in HD across all doses and all durations of metformin. Under all other scenarios we assume that the max effect is a 15% reduction in HD. The effect for each dose and duration is specified based on the dose-response and duration-response assumptions. We simulate under 3 different dose-response profiles. Under the “plateau” dose-response profile we assume a 7.5% reduction of the 500mg dose and a 15% reduction for the 1000 and 1500 mg doses. Under the “one good” profile we assume that there is a 0% reduction in HD for the 500 and 1000mg doses and a 15% reduction for the 1500mg dose. Under the “linear” profile, we assume a 3.75% reduction in HD for the 500mg dose, a 7.5% reduction for the 1000mg dose and a 15% reduction for the 1500mg dose. We also simulate under 2 different duration-response profiles, one where all durations work equally well and one where the intermediate and long durations work equally well but the short duration does not work for all doses. For each simulation we assume that 40% of the patients will have a short duration, 35% an intermediate duration and 25% a long duration.

Under each treatment effect scenario, we simulate 1000 clinical trials and report the following operating characteristics in Table 6.1:

- Probability of early success and total success
- Mean number of subjects enrolled in the trial
- Probability of stopping the short duration, intermediate duration or all of the durations
- Probability each dose is selected as best
- Probability increase sample size to 2500

The overall Type I error of the trial is 2.4% with 1% of the null trials stopping early for success and 91% of the null trials stopping early for futility or not increasing to the maximum sample size of 2500. The mean number of patients enrolled under the null scenario is 676. The probability the sample size is increased to 2500 under the null is 8%.

The power of the trial under the alternative scenarios ranges from 77-92% with the mean number of patients enrolled ranging from 1725 to 1822. When the short duration does not work, the probability of stopping the short duration is 80-84%. Across all alternative scenarios, we are choosing the right dose (a dose that has the maximum 15% reduction in HD effect) 79-96% of the time. Finally, the maximum sample size is increased from 2000-2500 21-31% of the time.

**Table 6.1: Operating Characteristics**

| Dose Response | Duration Response | Prob. Success |       | Mean N | Prob. Stop Futility |      |      | Prob. Selected Best |      |      | Prob. Enroll 2500 |
|---------------|-------------------|---------------|-------|--------|---------------------|------|------|---------------------|------|------|-------------------|
|               |                   | Early         | Total |        | Short               | Int. | All  | 500                 | 1000 | 1500 |                   |
| Null          | -                 | 0.010         | 0.024 | 676    | 0.95                | 0.92 | 0.91 | 0.35                | 0.30 | 0.35 | 0.08              |
| Plateau       | All Work          | 0.75          | 0.92  | 1767   | 0.12                | 0.06 | 0.04 | 0.04                | 0.50 | 0.46 | 0.21              |
|               | Not Short         | 0.66          | 0.87  | 1822   | 0.86                | 0.15 | 0.09 | 0.06                | 0.44 | 0.49 | 0.26              |
| One Good      | All Work          | 0.67          | 0.86  | 1729   | 0.28                | 0.15 | 0.11 | 0.03                | 0.03 | 0.95 | 0.23              |
|               | Not Short         | 0.56          | 0.78  | 1725   | 0.83                | 0.28 | 0.19 | 0.06                | 0.04 | 0.90 | 0.26              |
| Linear        | All Work          | 0.64          | 0.84  | 1776   | 0.20                | 0.12 | 0.10 | 0.04                | 0.10 | 0.86 | 0.26              |
|               | Not Short         | 0.51          | 0.77  | 1782   | 0.82                | 0.24 | 0.17 | 0.07                | 0.14 | 0.79 | 0.31              |

Subject ID: \_\_\_\_\_

# SAMPLE: SPRY Clinical Research Form

## SPRY-Metformin 30 Day Assessment

*Interviewer: Please complete before start of the interview. Enter subject ID # on the top of every page  
Follow up telephone call attempts will be made for the contact using discretion and judgment of the LTO personnel.*

|                                      |                                                                                                                                                                                                                                                                                                              |
|--------------------------------------|--------------------------------------------------------------------------------------------------------------------------------------------------------------------------------------------------------------------------------------------------------------------------------------------------------------|
| Date of SPRY Enrollment (MMDDYY)     |                                                                                                                                                                                                                                                                                                              |
| Date of Study Surgery (MMDDYYYY)     |                                                                                                                                                                                                                                                                                                              |
| Date of current interview (MMDDYYYY) |                                                                                                                                                                                                                                                                                                              |
| Interview conducted with:            | <input type="checkbox"/> Subject <input type="checkbox"/> Surrogate/LAR<br>If Interview conducted with surrogate, please indicated reason:<br><input type="checkbox"/> subject too ill/in a medical facility <input type="checkbox"/> Subject Death (Date: ___/___/___) <input type="checkbox"/> Other _____ |
|                                      |                                                                                                                                                                                                                                                                                                              |

Hello, I am [NAME] calling from the SPRY Study that you agreed to participate in prior to your surgical procedure. I'm calling you today to see how you are doing and to conduct the survey with you for the study. Is this a good time? We anticipate the total time for this call to be about 10-15 minutes.

*If no: "When is the best time to reach you? Do you have a preference what time of day we call?"*

*If yes: Wonderful. First let me remind you a bit about the purpose of the study*

**Purpose:** The purpose of this study is to test how well different doses and durations of the study medication "Metformin" may improve how people without diabetes do after having their surgical procedure. Today I'm just going ask you some questions about any medical services you may have used following your surgery as well as some questions about your use of the study medication and how you are feeling in general.

## Section 1: Post-discharge Resource Use

**Interviewer: If patient not yet discharged from surgical hospital, skip to Section 2**

- When you were discharged from the hospital following your surgery, did you go home right away or did you first stay **overnight in a different hospital or medical facility**?
  - Home (subject's normal domicile i.e. nursing home, assisted living, group home)
  - Home with medical assistance (home health care)
  - Another hospital or medical facility (new to subject)
  - Other: \_\_\_\_\_
  - Don't Know
  - Not discharged from surgical hospital

Subject ID: \_\_\_\_\_

Refused to answer

**Interviewer: [if "Home"] proceed to Question 3**

2. [If discharged to [Another Hospital or Medical Facility] to which type of facility did [patient's name] go after hospital discharge (choose all that apply if patient has been sent to multiple facilities since discharge from surgical hospital)?

- Total Days admitted \_\_\_\_\_
- Another Hospital  1 # admt\_\_\_\_  
Total Days\_\_\_\_\_
- Rehabilitation Center  2 # admt\_\_\_\_  
Total Days\_\_\_\_\_
- Hospice (hospice facility)  3 # admt\_\_\_\_  
Total Days\_\_\_\_\_
- LTAC  4 # admt\_\_\_\_  
Total Days\_\_\_\_\_
- SNF  5 # admt\_\_\_\_  
Total Days\_\_\_\_\_
- Other (specify)\_\_\_\_\_  6 # admt\_\_\_\_  
Total Days\_\_\_\_\_
- Don't Know
- Refused

3. Since being discharged to home, have you been admitted to a hospital OVERNIGHT? (*Do not include an overnight stay in the emergency room.*)

- Yes
- No
- Don't know
- Refused to Answer

4. [If yes] What was the name(s) of the hospital(s) to which you were readmitted?

\_\_\_\_\_

\_\_\_\_\_

\_\_\_\_\_

- Don't Know
- Refused to answer

Subject ID: \_\_\_\_\_

## Section 2: Quality of Life

**Interviewer : Now I will ask you questions about your general health. Please indicate which statements best describe your own health today.**

### *Mobility*

- I have no problems walking
- I have some problems walking
- I am confined to bed

### **Self-Care**

- I don't have problems caring for myself
- I have some problems washing or dressing myself
- I can't wash or dress myself

### *Usual Activities* (like work, housework, family activities)

- I don't have problems performing my usual activities
- I have some problems performing my usual activities
- I can't perform my usual activities

### *Pain and Discomfort*

- I don't have pain or discomfort
- I have moderate pain or discomfort
- I have extreme pain or discomfort

### *Anxiety and Depression*

- I am not anxious or depressed
- I am moderately anxious or depressed
- I am extremely anxious or depressed

## **PART TWO**

Now, on a scale from 0 to 100, where 100 represents the best imaginable health while 0 represents the worst possible health you could imagine, at what number would you rate your health in general **now?** (Interviewer, mark number on scale to the right and write the number given by the subject)

Answer: \_\_\_\_\_

Subject ID: \_\_\_\_\_

1  
2  
3 **Interviewer: Now I'm going ask you some questions about your current employment status.**  
4 **We are interested in whether you have recovered from your recent surgery and**  
5 **hospitalization sufficiently to return to work or your usual activities. Please choose the**  
6 **answer that most closely describes your situation right now**  
7  
8

9 ***Right now, my work and/or usually activity is:***

- 10 Full-time employment
- 11  
12 Part time employment
- 13  
14 Homemaker
- 15  
16 Retired
- 17  
18 Unemployed due to disability or illness
- 19  
20 Unemployed due to job loss and/or inability to find work
- 21  
22 Student
- 23  
24 Other
- 25  
26 Unknown (proxy response)
- 27  
28  
29

30  
31 ***This work and/or usual activity is:***

- 32 The same as before my surgery
- 33  
34 Different from before my surgery due to effects from the surgery
- 35  
36 Different from before I was hospitalized, but not due to my surgery
- 37  
38 Unknown (proxy response)
- 39  
40  
41  
42  
43  
44  
45  
46  
47  
48  
49  
50  
51  
52  
53  
54  
55  
56  
57  
58  
59  
60

Subject ID: \_\_\_\_\_

### Section 3: Use of Study Medication

Interviewer: I am now going to ask you some questions about your use of the study medication.

1. Since your discharge from the hospital following your surgery, have you temporarily or permanently stopped taking your study medication at any time?  
 Yes, Temporarily \_\_\_\_\_ (# of days stopped)  Yes, permanently \_\_\_\_\_ (date stopped)  
 No
2. Since your discharge from the hospital following your surgery, are there any days or times that you missed or forgot to take your study medication?  Yes  No
3. (If yes) How many doses of your study medication would you say you missed or forgot to take since you were discharged from the hospital after your surgery? \_\_\_\_\_ (# of doses)

**End of Interview:** Thank you for your time today. As a reminder, there is one final follow-up call/visit for this study which takes place in approximately 2 months from now. Would you be able to schedule that call/visit now?

**(If a telephone follow-up):** The call will take approximately 30 minutes and we'll ask you similar questions to today's call with some additional questions surrounding your memory and thinking.

**(If in person follow-up):** We estimate the time of the visit to be approximately 1.5 hours where we will do some tests of your thinking as well as your physical function. The visit will take place in our Critical Care Offices in Oakland.

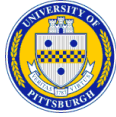

# University of Pittsburgh

*School of Medicine*

*Department of Critical Care Medicine*

600 Scaife Hall  
3550 Terrace Street  
Pittsburgh, PA 15261  
Fax: 412.647.8060

## CONSENT TO ACT AS A PARTICIPANT IN A RESEARCH STUDY

**STUDY TITLE:** Strategies to Promote Resiliency (SPRY)-An Adaptive Randomized Clinical Trial of Metformin in High Risk Surgical Patients

**PRINCIPAL INVESTIGATOR:**

Dr. Matthew Neal

University of Pittsburgh

Departments of Surgery, Critical Care Medicine, and the Clinical and Translational Science Institute

F1271.2 PUH

200 Lothrop Street

Pittsburgh, PA 15213

Phone: 412.647.1158

Tamera Means, MD, MHS

Clinical Research Coordinator

412.383.1573

**SOURCE OF SUPPORT:** UPMC Internal Funds

**KEY INFORMATION:**

You are being invited to consider joining a research study. Participation in a research study is always voluntary. The first part of this form is a summary of the study. Please also read the Detailed Information section that follows before making a decision about participation in this study.

**Why are researchers doing this study?**

Increasing age is a risk factor for having complications after surgery. There are some

Page 1 of 19

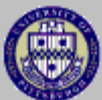

University Of Pittsburgh  
Institutional Review Board

Approval Date: 1/17/2020  
Renewal Date: 9/16/2020

IRB #: PRO18060038



1  
2 studies suggesting metformin, a medication often used for diabetes, may be able to  
3 reduce inflammation as well as have other effects which may help with complications.  
4

5 In this study, we want to look at whether or not metformin is able to improve your  
6 outcome and reduce complications after elective surgery.  
7

### 8 **What is involved in this study?**

9 You will be randomly assigned to receive one of 3 doses of metformin (500 mg, 1000  
10 mg, or 1500 mg) or one of three doses of placebo (sugar pills). You will take this study  
11 drug starting tomorrow and continue to take this study drug for 90 days after your  
12 surgery.  
13  
14

15  
16 If you participate in this study, you may have blood samples taken at up to 5 timepoints  
17 while you take the study drug. This blood would be stored without identifiers.  
18

19 You may also complete questionnaires during this study.  
20

### 21 **What are some reasons I might choose to volunteer?**

22 Researchers are conducting this study because they do not know if metformin might be  
23 helpful. Their goal is to determine what might help future patients.  
24  
25

### 26 **What risks are involved in the study?**

27 For those people who are assigned to take metformin, some people may experience  
28 mild stomach and digestive system side effects as outlined in the 'Potential Risks and  
29 Discomforts' section which follows. These are usually temporary and resolve with  
30 continued use of metformin.  
31  
32

33 Other minor risks are noted in the 'Potential Risks and Discomforts' section.  
34

### 35 **What other things should I consider?**

36 You will not be charged for costs associated with the study drug or for any procedures  
37 required by the study. Costs associated with your routine medical care, including your  
38 elective surgery and hospital stay, will still be your responsibility or that of your  
39 insurance provider.  
40  
41

### 42 **Will being in this study help me?**

43 For those assigned to the placebo group, no direct benefit is expected. For those who  
44 will be taking metformin, it is not known if there will be any direct benefit to you.  
45  
46

### 47 **What are my choices if I decide not to be in this study?**

48 If you decide not to join the study, this will have no effect on your elective surgery.  
49  
50  
51  
52  
53  
54



## **DETAILED INFORMATION**

### **INTRODUCTION:**

This study is being conducted to determine if people taking metformin have better outcomes and fewer complications after having elective surgery compared to people not taking metformin. Metformin is a medication commonly given by doctors to reduce blood sugar in people with diabetes (a disease where you have higher than normal blood sugar). The use of metformin in this research study is investigational. “Investigational” means that the use of metformin for the purpose of improving outcome after surgery is not approved by the United States Food and Drug Administration.

In this consent form, “you” and “your” always refers to the subject and “we” always refers to the study team.

You are being asked to participate in this research study as you are scheduled for an elective surgical procedure in a UPMC facility as part of your routine care. You may be eligible for participation in this research study if you are at least 60 years of age and do not have diabetes. You may also be eligible if you are younger than 60 years of age and have certain chronic medical conditions. Women enrolled into this study must be post-menopausal, which means that you have not had a menstrual period within the last 12 months.

### **DESCRIPTION OF THE RESEARCH**

A total of up to 2,000 men and women may be enrolled into this research study over the next two years at the University of Pittsburgh/UPMC.

Your study participation will begin on the day you are seen in the clinic for the pre-operative evaluation prior to your surgery. As part of this study, you will take a study drug prior to your operation and then for ninety (90) days after the date of your surgery. Medical record information may be collected for approximately a year after your completion of the study drug.

### **WHEN THE INVESTIGATOR IS ALSO THE CARE-PROVIDER:**

For some of you, your physician is involved as an investigator in this research study. Before agreeing to participate, or at any time during your study participation, you may discuss your care with another doctor who is not associated with this research study. You are not under any obligation to participate in any research study offered by your physician.



## STUDY PROCEDURES:

If you decide to take part in this research study, certain research procedures may occur.

### Clinic Visit Before Your Surgery:

- You may answer questions regarding your demographic details (date of birth, race, etc.)
- You may answer a few general questions about your medical history, allergies, and your use of alcohol to verify that you are eligible to participate in this study.
- You may be asked to provide contact information (name, phone number, mailing address, e-mail address) for you, your spouse/partner, and maybe for another friend/relative. This contact information is collected as the study team may need to contact you throughout the study. If the study team cannot reach you, they would then try to reach one of the other individuals you have identified for the study team.
- You may have a blood sample drawn. Blood will be drawn to store some blood for future testing to be able to compare how aspects of your blood change as you progress through the study. The blood would likely be drawn by putting a needle into a vein in your arm. About four (4) tablespoons of blood may be taken for this study at the same time as blood is drawn for testing required for your surgery if needed. Your blood would be drawn by a nurse or another skilled medical professional. The blood draw should take about ten minutes. Other blood samples may be taken at other times during the study. When possible, these blood samples would be drawn at the same time as standard of care blood is drawn.
- You will be randomly assigned by chance to receive one of the following study drugs to take one time daily by mouth:
  - 500 mg (1 pill) metformin extended release (ER)
  - 1000 mg (2 pills) metformin extended release (ER)
  - 1500 mg (3 pills) metformin extended release (ER)
  - Placebo (1 pill)
  - Placebo (2 pills)
  - Placebo (3 pills)

A placebo is a sugar pill that looks like a metformin pill but does not contain any active drug. At the beginning of the study, an individual has a 37% (37 in 100) chance of receiving placebo and a 63% (63 in 100) chance of receiving one of the three metformin doses. Once an individual is assigned to receive placebo or metformin, the individual takes this study drug for the duration of the study.

As this study is designed to enroll people over 2 years, the likelihood that those who participate at a later time will receive metformin or placebo will change based on the number of individuals who have participated in the study up to that point.

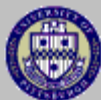

1  
2 If you are assigned to either the 1500 mg metformin extended release dose or the 3 pill  
3 placebo option, you will take 2 pills for the first 7 days. Starting on day eight, you will  
4 then take 3 pills. The reason to begin with the lower dose is that this will help to reduce  
5 possible side effects if you are taking metformin.  
6

7 Both you and the study team will not know if you are taking metformin or placebo during  
8 the study. In the event of an emergency, it is possible for the study team to learn what  
9 study drug you are taking.  
10

11  
12 You should start to take the study drug the morning after your pre-operative clinic visit.  
13 You should take the study drug every day. You should take the study drug with food to  
14 minimize GI effects. You should bring your current study drug pill bottle with you on the  
15 date of your surgery. Depending upon when your surgery is scheduled, the UPMC  
16 Investigational Drug Service may need to send you additional study drug by mail. It is  
17 important that you take all of the study drug in the current study drug pill bottle before  
18 starting to take study drug from a new study drug pill bottle received in the mail.  
19

20  
21 You should continue to take the study drug through the day of your elective surgical  
22 procedure and for 90 days following the date of your surgery. The study drug will only  
23 be available to you during the study.  
24

- 25 • You will be given a wallet card that indicates that you are participating in this  
26 study. This card lists that you may be taking metformin. You should carry this  
27 wallet card with you and show this wallet card to any health care professional you  
28 see while you are taking the study drug.  
29
- 30 • We may contact your PCP and other members of your health care team to let  
31 them know of your involvement in this study. These communications could occur  
32 at various times throughout your study participation.  
33
- 34 • As part of the process for you to decide to participate in this study, you will speak  
35 with one of the investigators involved with this study. If the investigator cannot  
36 promptly come to your clinic location, this interaction may occur via phone or via  
37 remote video conference. The purpose of your conversation with the  
38 investigator is for the investigator to ensure that you understand what is involved  
39 in study participation and to ensure all of your questions have been answered.  
40 Following the conversation with the investigator, either in person or by  
41 telephone/video conference, this informed consent will be signed by you and by  
42 the investigator. A copy of the informed consent will be given to you.  
43  
44

45 These research procedures will likely take place in the clinic where you are having your  
46 office visit before surgery. The research procedures may add approximately 45 minutes  
47 to your visit.  
48

49 Prior to the day of surgery, ideally within 48 hours of study enrollment:  
50

- 51 • You may receive a phone call from a member of the Long Term Outcomes Core  
52 team. The purpose of this phone call is to remind you of the importance of  
53



1  
2 bringing your study drug pill bottle with you when you come to the hospital for  
3 your elective surgery.

- 4 • During this phone call, a member of the Long Term Outcomes Core may ask you  
5 some questions about your general health and to assess your thinking and  
6 memory. This phone call should take about 15 minutes.  
7  
8  
9

#### 10 Day of surgery:

- 11 • You should give your study drug pill bottle to hospital staff personnel when you  
12 arrive at the hospital for your surgery. Your study drug pill bottle will be kept by  
13 hospital personnel while you are in the hospital. You will continue to take the  
14 study drug while you are in the hospital.  
15
- 16 • You may have a blood sample drawn from the intravenous (IV) line that is  
17 inserted in your arm for your surgery or directly from a vein. About four (4)  
18 tablespoons of blood may be taken. Your blood would be drawn by a nurse or  
19 another skilled medical professional. The blood draw should take less than ten  
20 minutes.  
21
- 22 • We may review your medical records and collect information related to your  
23 surgery and the medications you receive for your surgery as well as your general  
24 health. We may continue to review and collect this kind of information while you  
25 are in the hospital.  
26  
27

28 These research activities should take about 25 minutes.  
29

#### 30 After surgery:

- 31 • You may have blood drawn from the intravenous (IV) line that was inserted in  
32 your arm for your surgery or directly from a vein. About three and a half (3.5)  
33 tablespoons of blood may be taken at this time. Your blood would be drawn by a  
34 nurse or another skilled medical professional. The blood draw should take less  
35 than ten minutes and should occur in your hospital room.  
36  
37  
38

#### 39 During your hospital stay:

- 40 • You will continue to receive the study drug during your hospital stay. We may  
41 decide to suspend giving you the study drug if you have certain types of  
42 difficulties as a result of your surgery.  
43  
44

#### 45 Day 3 after surgery or immediately prior to hospital discharge if earlier than Day 3:

- 46 • You may have blood drawn from the intravenous (IV) line inserted in your arm for  
47 your medical care or directly from a vein. About three and a half (3.5)  
48 tablespoons of blood may be taken at this time. Your blood would be drawn by a  
49 nurse or another skilled medical professional. The blood draw should take less  
50 than ten minutes.  
51  
52  
53



1  
2 Day of hospital discharge:  
3

- 4 • You should be given another pill bottle containing the same study drug as before  
5 your surgery. You should continue to take the study drug for a total of 90 days  
6 since the date of your surgery.  
7

8  
9  
10 These research procedures should take about 15 minutes and would take place in your  
11 room at the hospital before you leave the hospital to go home.  
12

13 Follow-up visit approximately 2-3 weeks after surgery (Usual Care):  
14

- 15 • You may have blood drawn from a vein in your arm. About three and a half (3.5)  
16 tablespoons of blood may be taken for this study. Your blood would be drawn by  
17 a skilled medical professional. The blood draw should take about ten minutes  
18 and would take place in the clinic where you see your doctor or in a nearby  
19 UPMC location.  
20

21  
22 Phone call 30 days (+/- 7 days) after surgery:  
23

24 All subjects participating in this study may receive a phone call from the Long Term  
25 Outcomes Core who may ask you questions about your general health, your taking of  
26 the study drug, your general level of physical activity, and about whether you have seen  
27 any doctors/been to the hospital since your surgery. This phone call should take about  
28 10-15 minutes.  
29

30  
31 Phone call 90 days (+ 28 days) after surgery:  
32

33 **If you are not participating in the Motor Assessment Group (see below),** the Long-  
34 Term Outcomes Core may contact you via telephone to ask you the same kinds of  
35 questions as asked during the 30-day call. You may also be asked some questions to  
36 assess your memory, attention, and thinking skills.  
37

38 This phone call should take about 30-35 minutes.  
39

40 For those subjects who completed their 90 day questionnaires via phone call with the  
41 Long Term Outcomes Core, you will be reminded to discard the wallet card.  
42

43 **MOTOR ASSESSMENT GROUP**  
44

45 **For those subjects who live within 20 miles of Oakland and are over the age of 65,**  
46 you may be asked to come in to the offices of the Department of Critical Care Medicine  
47 in Oakland to be a part of a Motor Assessment Group. Being a part of the Motor  
48 Assessment Group would be an in-person visit at 90 days (+28 days after surgery)  
49 rather than a phone call.  
50

51  
52 The goal of the Motor Assessment Group is to determine if people taking metformin  
53 have differences in their muscle strength after surgery compared to people not taking  
54

55 Page 7 of 19



University Of Pittsburgh  
Institutional Review Board

Approval Date: 1/17/2020  
Renewal Date: 9/16/2020

IRB #: PRO18060038

1  
2 metformin. The Motor Assessment Group could enroll approximately 670 subjects.  
3

4 During this visit, members of the Long Term Outcomes Core may ask you similar  
5 questions to those asked during the phone call 30 days after surgery. You may also be  
6 asked some questions to assess your memory, attention, and thinking skills.  
7

8 In addition, you may have your grip strength measured and be asked to walk as far a  
9 distance as you can walk on a 50-foot (out and back) course in 2 minutes.  
10

11 These interactions should take approximately 90 minutes.  
12

13 During this visit, you will be reminded to discard the wallet card.  
14

15 If the study team should determine that these questionnaires would be best collected  
16 via a phone call rather than via an in-person visit, a phone call would be scheduled with  
17 you to complete these questionnaires.  
18  
19

## 20 **MICROBIOME SUB-STUDY**

21

22 We are interested to determine if there are differences in the microbiome (the  
23 microorganisms such as bacteria and their genetic material that are present in or on the  
24 human body) for people who are taking metformin as compared to people who are  
25 taking placebo. In order to determine these differences, up to 1000 subjects may be  
26 asked to provide stool specimens as part of a Microbiome Sub-study.  
27  
28

29 Clinic visit before your surgery:  
30

- 31 • You may be asked to provide a stool specimen prior to your surgery. You would  
32 be instructed on how to collect a stool specimen at home. We would give you  
33 instructions and a container, which is placed on your toilet, so you can collect the  
34 stool. You will place a small amount of stool in a special tube. You would be  
35 given a pre-paid envelope to mail the sample back to the study team for  
36 processing and storage. If you are asked to provide a stool specimen prior to  
37 your surgery, you will be asked to provide other stool samples at other times  
38 during the study.  
39  
40

41 Day of surgery:  
42

- 43 • You may have a rectal swab collected. Once you have been taken to the  
44 operating room and given medications for your surgery to make you sleepy, a  
45 cotton swab would be gently inserted approximately 1 inch into your anus. The  
46 cotton swab would be gently swirled for 15-30 seconds and then removed. The  
47 swab may be sent to the study team for processing and storage. The purpose of  
48 collecting the rectal swab is the same as collecting stool specimens.  
49  
50  
51

52 During your hospital stay:  
53  
54

55 Page 8 of 19

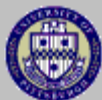

56 University Of Pittsburgh  
57 Institutional Review Board

58 Approval Date: 1/17/2020  
59 Renewal Date: 9/16/2020

60 IRB #: PRO18060038

- 1  
2  
3  
4  
5  
6  
7  
8  
9
- You may be asked to provide a stool specimen during your hospital stay. The stool specimen would be collected in the same way as the previous time. If you need help to collect the stool specimen, a nurse, another medical professional or study team member may assist with the collection. The stool would be placed in a special tube and sent to the study team for processing and storage in the same way as the previous specimen.

10  
11  
12  
13  
14  
15  
16  
17  
18

If you may not have a bowel movement in the hospital, you may be asked to provide a stool specimen from your first bowel movement following discharge from the hospital. If you had a bowel movement in the hospital, but stool specimen collection did not occur, you may be asked to provide a stool specimen from your next bowel movement following discharge from the hospital. You are asked to collect the stool specimen within 5 days of your surgery. You would be provided with a pre-paid envelope to mail the sample back to the study team.

19  
20

Day of hospital discharge:

- 21  
22  
23  
24
- We will provide you with the materials needed for the collection of another stool specimen before you leave the hospital as well as a pre-paid mailing envelope to return the stool sample to us.

25  
26

Post-op clinic visit:

- 27  
28  
29  
30  
31
- We would like you to collect a stool specimen as close as possible to the time of the follow-up visit with your doctor (approximately 2-3 weeks after your surgery). You would follow the same procedure as before to collect the stool specimen.

## 32 33

### MUSCLE BIOPSY SUB-STUDY

34  
35  
36  
37  
38  
39  
40  
41  
42

Up to 200 of the subjects who take part in the Motor Assessment Group who are willing will be recruited to participate in the Muscle Biopsy Sub-study. We are interested to determine the effect metformin may have on muscle structure and on muscle cell functioning. In order to do so, we will collect samples of muscle tissue from up to 200 subjects who are participating in the Motor Assessment Group at two time points of the sub-study. We will compare the results with the results from strength testing completed as part of the Motor Assessment Group (Visit at 90 days (+ 28 days) after your surgery).

43  
44

A sample of muscle may be obtained at up to 2 timepoints during this sub-study:

- 45  
46  
47  
48  
49  
50
- While you are under anesthesia on the day of your elective surgery
  - While you are awake during the Visit at 90 days (+ 28 days) after surgery. This muscle biopsy will occur in Radiology Procedure Unit B (RPU B) or on the 8<sup>th</sup> Floor of UPMC Montefiore Hospital, Translational Research Center

51  
52  
53

You will be given instructions on withholding certain medications which thin the blood or slow clotting time if you are prescribed them and agree to undergo the biopsy.

54  
55

Page 9 of 19

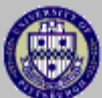

University Of Pittsburgh  
Institutional Review Board

Approval Date: 1/17/2020  
Renewal Date: 9/16/2020

IRB #: PRO18060038



1  
2 The muscle sample collection procedure involves using a needle to take a small piece  
3 of muscle tissue from the outside of your upper leg, about 4-6 inches above the knee.  
4 The skin will be cleaned and injected with local anesthetic (numbing medicine) to  
5 minimize any pain. A small incision about the size of this dash “\_” (1/4th of an inch)  
6 will be made in the skin, through which a needle about the size of the letter “O” is slowly  
7 inserted into the muscle. A piece of the muscle (about the size of a pea) is then  
8 removed with the needle, the skin is closed with a steri-strip and a light dressing is  
9 applied then a pressure wrap is placed over the dressing.  
10  
11

12 Muscle biopsies would be performed by physicians on the study team experienced in  
13 muscle biopsies.  
14

15 Your clinical care team will address biopsy care needs while you are in the hospital and  
16 you will be given post-biopsy care instructions for the 90-day biopsy.  
17

### 18 **CONTINUED ACCESS TO MEDICAL RECORD INFORMATION**

19  
20 We also would like to have permission to collect medical record information for over one  
21 year from the time you stop taking the study drug. We would collect information related  
22 to your general health such as test results, treatments, and doctor’s notes as well as  
23 information about any hospital admissions and emergency department visits. In order  
24 to collect this medical record information from non-UPMC facilities, you may be asked to  
25 sign a separate authorization which would permit the sharing of your non-UPMC  
26 protected health information with the study team.  
27  
28

### 29 **DATA RETENTION/BLOOD, STOOL, AND MUSCLE BIOPSY SAMPLES**

30  
31 All of the blood samples, stool samples, and muscle biopsy collected during this study  
32 will be placed in a specimen bank. The purpose of the specimen bank is to collect and  
33 store these samples for future research studies related to aging as well as to study  
34 various types of diseases and conditions. Your blood samples, stool samples, and  
35 muscle biopsy samples, as applicable, will be kept forever. Your past, current and future  
36 medical record information stored at UPMC will be available to be matched with your  
37 biological samples. This data will be stored in a controlled-access database. Your  
38 data, which may include your health information, your biological samples, and genetic  
39 data generated from your samples will be stored with a unique ID number, but will not  
40 be stored with your name. Your blood samples, stool samples, and muscle biopsy  
41 samples, as applicable, may be used by other investigators here at the University of  
42 Pittsburgh and UPMC and may be shared with other researchers, industry, or with a  
43 federal repository without additional consent from you. One collaborator who may  
44 receive a portion of your muscle biopsy samples is the University of Utah. Your muscle  
45 biopsy samples will not be stored long term at the University of Utah. When your  
46 biological samples are shared, they will be shared without identifiers. Data and samples  
47 may be shared for any research question.  
48  
49  
50  
51

52 It is also possible a portion of your muscle biopsy sample may be analyzed immediately  
53  
54



1  
2 by investigators at the University of Pittsburgh.

3  
4 Research data will be maintained for at least 7 years following closure of this research  
5 study.

6  
7 Analysis of these samples may include genetic analysis as previously described.

8  
9 Any genetic information obtained from these studies will not be entered into your  
10 medical records. No clinically relevant results will be returned to you.

11  
12 As the research questions to be asked are unknown and as the meaning and  
13 significance of the results of any future unspecified testing of the biospecimens  
14 collected under this research study is unknown, personal results will not be disclosed to  
15 research subjects.

16  
17 Your blood samples, stool samples and research data collected in this study may  
18 contribute to a new discovery or treatment. In some instances, these discoveries or  
19 treatments may be of commercial value and may be sold, patented, or licensed by the  
20 investigators and the University of Pittsburgh for use in other research or the  
21 development of new products. You will not retain any property rights, nor will you share  
22 in any money that the investigators, the University of Pittsburgh, or their agents may  
23 realize.

## 24 25 26 27 **POTENTIAL RISKS AND DISCOMFORTS**

28  
29 **Metformin:** The known risks are effects on your stomach and digestive system such as  
30 gas, loss of appetite, nausea, vomiting, diarrhea, and decreased levels of B12  
31 (cobalamin).

32  
33 These side effects are usually temporary and resolve with continued use of metformin.

34  
35 There is a rare risk of something called lactic acidosis. This is the build-up of something  
36 called lactate in your blood. Lactate in your blood normally is harmful if there too much.  
37 Early signs of this are changes in your breathing and belly pain. Always call the study  
38 team if you have any concern.

39  
40 You should not participate in this study if you know you have an allergy to metformin.

41  
42 As with all medications, in very rare cases, the use of metformin may result in an  
43 allergic reaction. Some symptoms of allergic reactions include: rash, difficulty breathing,  
44 wheezing, sudden drop in blood pressure, swelling around the mouth, throat or eyes, a  
45 fast pulse, sweating. Please seek emergency treatment immediately if you experience  
46 these kinds of symptoms and then alert the study doctor and study staff if you have  
47 these symptoms as a very serious allergic reaction may be life-threatening.

48  
49 The study drug could interact with other drugs such as carbonic anhydrase inhibitors,



1  
2 gliptins, and cimetidine.  
3

4 **Blood sampling:** You may experience temporary discomfort, bruising, pain at the blood  
5 draw site, and fainting (rare risk).  
6

7 **Surveys/questionnaires:** Individuals completing questionnaires/surveys may  
8 experience mild frustration or boredom in completing these assessments.  
9

10  
11  
12 Motor Assessment Group:  
13

14 **Two-minute walk test:** You may become tired during this test, depending upon your  
15 general health. If you become tired, you may stop walking at any time.  
16

17 **Grip strength test:** There are no known risks.  
18

19  
20 For Microbiome Sub-Study:  
21

22 **Stool sample:** There are no known risks to providing a stool sample.  
23

24 **Rectal swab:** The collection of the rectal swab may cause temporary mild  
25 discomfort following the procedure.  
26

27  
28 For Muscle Sub-Study:  
29

30  
31 **Muscle sample collection:** You may have pain, bleeding, bruising at the site of  
32 the incision. In rare cases, infection at the site of the muscle sample collection is  
33 possible. Some people may also faint at the sight of needles or blood. To  
34 minimize this risk, we would perform this procedure while you lie down. Careful  
35 sterile technique and local anesthesia should reduce the likelihood of any of  
36 these complications. The risk of pain during the muscle collection procedure is  
37 very small, because we will give you anesthesia (numbing medicine). In case,  
38 you feel anything more than pressure, you will tell us, and we would give you  
39 more numbing medicine until the area is completely numb. People experience  
40 the feeling of a muscle biopsy differently because of different pain thresholds and  
41 how the numbing medicine works in any individual. You may feel very little or  
42 only a charley horse sensation, or you may feel more distinct pain. After the  
43 study, you have a chance of experiencing soreness at the site of muscle sample  
44 collection for 24 to 48 hours. However, over-the-counter medications such as  
45 Tylenol and cold packs are enough to control such a discomfort. There is also a  
46 very rare possibility of numbness around the site of muscle sample collection.  
47 This is typically temporary and should resolve within a few months. The muscle  
48 sample collection may leave a scar approximately long like this dash “\_\_\_”.  
49  
50  
51

52 Lidocaine use with the 90-day muscle biopsy: Minor pain at the injection site and  
53



1  
2 brief stinging may occur. A possible side-effect is an anaphylactic reaction (a  
3 severe allergic reaction to the Lidocaine) that could result in symptoms such as  
4 shortness of breath, swelling of the throat, inflammation of the skin, skin rash, low  
5 blood pressure and death (rare).  
6

7  
8 **Breach of confidentiality:** It is possible that someone could find out that you were in  
9 this study and could find out information about you. Every effort will be made to prevent  
10 this from happening. To protect your confidentiality, we will remove your name and  
11 other personal identifiers from the samples and from the medical record information we  
12 obtain. This information will be identified by a code.  
13

14  
15 **Risks associated with gene studies:** The risks associated with gene studies include  
16 the potential for a breach of confidentiality which could affect future insurability,  
17 employability, or reproduction plans, or have a negative impact on family relationships  
18 and/or result in paternity suits or stigmatization.  
19

20  
21 In addition, there is a Federal law, called the Genetic Information Nondiscrimination Act  
22 (GINA), that generally makes it illegal for health insurance companies and group health  
23 plans to use genetic information in making decisions regarding your eligibility or  
24 premiums. GINA also makes it illegal for employers with 15 or more employees to use  
25 your genetic information when making decisions regarding hiring, promoting, firing, or  
26 setting the terms of employment. This new Federal law does not protect you against  
27 genetic discrimination by companies that sell life, disability, or long-term care insurance.  
28

29  
30 To facilitate communication during the study, this study will use e-mails to update the  
31 study team of your progress in the study. This may include the use of your name and  
32 other personal identifiers to ensure accurate information. Although every reasonable  
33 effort has been taken, confidentiality during Internet communication activities cannot be  
34 guaranteed and it is possible that additional information beyond that collected for  
35 research purposes may be captured and used by others not associated with this study.  
36

37  
38 As with any experimental procedure, there may be adverse events or side effects that  
39 are currently unknown and certain of these unknown risks could be permanent, severe  
40 or life-threatening.  
41

## 42 **ANTICIPATED BENEFITS TO SUBJECTS**

43  
44 For those subjects assigned to the placebo group (no metformin will be taken), no direct  
45 benefit from study participation is expected. For those subjects who will be taking  
46 metformin, it is not known if there will be any direct benefit to you from being in the  
47 research study.  
48

## 49 **ALTERATIVE TREATMENTS**

50  
51  
52 There are no alternative procedures which may be of benefit to you if you choose not to  
53 participate in this research study.  
54

55 Page 13 of 19

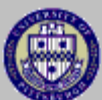

56 University Of Pittsburgh  
57 Institutional Review Board

58 Approval Date: 1/17/2020  
59 Renewal Date: 9/16/2020

IRB #: PRO18060038

## NEW INFORMATION

You will be promptly notified if any new information we learn during this research study may cause you to change your mind about continuing to participate in the study.

## COSTS AND PAYMENTS

If you agree to take part in this research study, you and/or your insurance will not have to pay for the study drug or any tests that are being done only for the research study. However, you are still responsible for paying for elective surgery and hospital admission as well as other care you would normally receive. This includes treatments and tests you would need even if you were not in this study. These costs will be billed to you and/or your insurance.

If you complete the entire study, you may be paid up to \$200 in return for your time and effort associated with research study involvement. These funds will be provided to you as \$50 payments 4 times throughout the study:

\$50 following the clinic visit before surgery

\$50 following the hospital stay

\$50 following the phone call at roughly 30 days after surgery

\$50 following the phone call/visit at roughly 90 days after surgery

In addition, if you participate in the Microbiome Sub-study, you will be paid \$20 for each of the stool samples and rectal swab collected for this study for a total of \$80 over the course of the study.

You will receive this compensation via a reloadable debit card. The debit card is not loaded with funds until you coordinate with the study team to load the card with funds. Since you are being compensated for your participation in this study, your name, address, and social security number will be released to the Accounting Office. If you are not comfortable with providing your social security number for use by the Accounting Office, taxes will automatically be removed from the payment.

## USE AND DISCLOSURE OF PROTECTED HEALTH INFORMATION

We are also requesting your authorization or permission to review your medical records. This research study may involve the recording of past, current and/or future identifiable medical information from your hospital and/or other (e.g. physician office) records to determine whether you meet the conditions for participation in this study. The information that may be recorded will include information concerning your medical history, results of lab tests, diagnostic procedures, the reason for your elective surgical procedure, and the type of medical insurance you have. In addition, medical record information related to your hospital stay for your elective surgery and any follow-up visits may be recorded to assess the effects of the study drug. As part of this research



1  
2 study, some information that we obtain from you may be placed into your medical  
3 records held at UPMC, including the results of any testing performed specifically for this  
4 research study. This authorization to provide identifiable information available to  
5 members of the study team is valid for an indefinite period of time.  
6

7  
8 In addition to the Principal Investigator listed on the first page of this consent form and  
9 the other investigators involved in this study and the study team, the following  
10 individuals will or may have access to identifiable information (which may include your  
11 identifiable medical information) related to your participation in this research study:  
12

- 13 • Authorized representatives of the University of Pittsburgh Research Conduct and  
14 Compliance Office for the purpose of monitoring the appropriate conduct of this  
15 research study.
- 16 • Authorized representatives of UPMC or other affiliated health care providers for  
17 the purpose of (1) fulfilling orders made by the investigators for hospital and  
18 health care services (e.g., diagnostic procedures) associated with research study  
19 participation; (2) addressing correct payment for tests and procedures ordered by  
20 the investigators; and/or (3) for internal hospital operations (e.g., quality  
21 assurance).  
22  
23  
24

25 We will protect your privacy and the confidentiality of your records, as described in this  
26 document, but cannot guarantee the confidentiality of your research records, including  
27 information obtained from your medical records, once your personal information is  
28 disclosed to others outside UPMC or the University.  
29

30  
31 In addition, coded data about your participation in this study will be shared with Berry  
32 Consultants, LLC, a collaborator, and an external Data Safety and Monitoring Board  
33 (DSMB). The DSMB will review this coded data for the purpose of overseeing study  
34 progress and evaluating the potential risks to subjects associated with study  
35 participation.  
36

37  
38 We may send your de-identified muscle biopsy samples for analysis to investigators at  
39 the University of Pittsburgh and/or to other collaborators such as the University of Utah  
40 for analysis. The linkage document containing your name and your study ID will not be  
41 shared with these research teams. Descriptors such as your age and gender may be  
42 shared but no identifiable information.  
43

44  
45 We may share your responses from the EQ-5D questionnaires with your health care  
46 providers.  
47

48 A description of this clinical trial will be available on <http://www.clinicaltrials.gov>, as  
49 required by US Law. This website will not include information that can identify you. At  
50 most, the website will include a summary of the results. You can search this website at  
51 any time.  
52  
53



## MEDICAL CARE FOR RESEARCH RELATED INJURY

If you believe that the research procedures have resulted in an injury to you, immediately contact the Principal Investigator who is listed on the first page of this form. Emergency medical treatment for injuries solely and directly related to your participation in this research study will be provided to you by the hospitals of UPMC. Your insurance provider may be billed for the costs of this emergency treatment, but none of those costs will be charged directly to you. If your research-related injury requires medical care beyond this emergency treatment, you will be responsible for the costs of this follow-up care. At this time, there is no plan for any additional financial compensation. You do not, however, waive any legal rights by signing this form.

## VOLUNTARY PARTICIPATION

Your participation in this research study is entirely voluntary. You may want to discuss this study with your family and friends and your personal physician before agreeing to participate. If there are any words you do not understand, feel free to ask us. The investigators will be available to answer your current and future questions.

Whether or not you provide your consent for participation in this research study will have no effect on your current or future relationship with the University of Pittsburgh. Whether or not you provide your consent for participation in this research study will have no effect on your current or future medical care at a UPMC hospital or affiliated health care provider or your current or future relationship with a health care insurance provider.

As both your doctor and a research investigator, s/he is interested both in your medical care and the conduct of this research study. Before agreeing to participate in this research study, or at any time during your study participation, you may discuss your care with another doctor who is not associated with this research study. You are not under any obligation to participate in any research study offered by your doctor.

To formally withdraw your consent for participation in this research study, you should provide a written and dated letter of this decision to the principal investigator of this research study at the address listed on the first page of this form.

## RIGHT TO WITHDRAW

It is possible that you may be removed from the research study by the researchers if, for example,



1  
2  
3  
4  
5  
6  
7  
8  
9  
10  
11  
12  
13  
14  
15  
16  
17  
18  
19  
20  
21  
22  
23  
24  
25  
26  
27  
28  
29  
30  
31  
32  
33  
34  
35  
36  
37  
38  
39  
40  
41  
42  
43  
44  
45  
46  
47  
48  
49  
50  
51  
52  
53  
54  
55  
56  
57  
58  
59  
60

- You do not or cannot take the study drug properly.
- The researcher feels it is in your best interest not to continue in the study.
- The funding for the study is not continued.
- There may be other reasons to remove you from the study not identified at present.

In the event of study withdrawal, you will be asked to return the study drug pill bottle to the study team using a pre-paid mailing envelope.

Upon your withdrawal from this study, you should participate in additional monitoring follow-up procedures that are being conducted to measure the safety of the study drug.

All information obtained from you up until the date of your withdrawal from the study will be maintained in a coded fashion. No further data will be collected following your withdrawal from the study. Your blood and stool samples which have been placed into storage may continue to be used for analysis, but no further samples will be collected from you for this study.

Peer review only

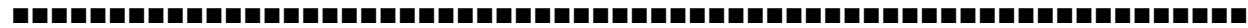

**VOLUNTARY CONSENT TO PARTICIPATE:**

|  |                                                                |                                                             |                           |
|--|----------------------------------------------------------------|-------------------------------------------------------------|---------------------------|
|  | <b>University Of Pittsburgh<br/>Institutional Review Board</b> | <b>Approval Date: 1/17/2020<br/>Renewal Date: 9/16/2020</b> | <b>IRB #: PRO18060038</b> |
|--|----------------------------------------------------------------|-------------------------------------------------------------|---------------------------|



The above information has been explained to me and all of my current questions have been answered. I understand that I am encouraged to ask questions, voice concerns or complaints about any aspect of this research study during the course of this study, and that such future questions, concerns or complaints will be answered by a qualified individual or by the investigator listed on the first page of this consent document at the telephone number given.

I understand that I may always request that my questions, concerns or complaints be addressed by a listed investigator. I understand that I may contact the Human Subjects Protection Advocate of the IRB Office, University of Pittsburgh (1-866-212-2668) to discuss problems, concerns, and questions; obtain information; offer input; or discuss situations that occurred during my participation. By signing this form, I agree to participate in this research study and provide my authorization to share my medical records with the study team. A copy of this consent form will be given to me.

\_\_\_\_\_  
Printed Name of Participant

\_\_\_\_\_  
Signature of Participant

\_\_\_\_\_  
Date

\_\_\_\_\_  
Time

### INVESTIGATOR CERTIFICATION:

*I certify that I have explained the nature and purpose of this research study to the above-named individual(s), and I have discussed the potential benefits and possible risks of study participation. Any questions the individual(s) have about this study have been answered, and we will always be available to address future questions, concerns or complaints as they arise. I further certify that no research component of this protocol was begun until after this consent form was signed.*

\_\_\_\_\_  
Printed Name of Person Obtaining Consent

\_\_\_\_\_  
Role in Research Study

\_\_\_\_\_  
Signature of Person Obtaining Consent

\_\_\_\_\_  
Date

\_\_\_\_\_  
Time

### CONSENT FOR OPTIONAL GROUPS AND SUB-STUDIES



You are being asked to confirm your interest in participating in the following optional groups and sub-studies which have been explained in the preceding pages:

| Initials of person obtaining informed consent indicating Group/Sub-study is available* | Title of Group/Sub-Study                                                                                                                                  | Initials of this subject indicating their interest in Group/Sub-study* |
|----------------------------------------------------------------------------------------|-----------------------------------------------------------------------------------------------------------------------------------------------------------|------------------------------------------------------------------------|
|                                                                                        | Motor Assessment Group (involves in person visit around 90 days after surgery instead of phone call and involves grip strength and two-minute walk tests) |                                                                        |
|                                                                                        | Microbiome Sub-study (involves stool sample collections and rectal swab)                                                                                  |                                                                        |
|                                                                                        | Muscle Biopsy Sub-study (involves up to 2 muscle biopsies)                                                                                                |                                                                        |

\* Initials are required in both the first and third column for Sub-study participation.



Supplement: bmjopen-2020-037690.draft_revisions.pdf [file bmjopen-2020-037690.draft_revisions.pdf]
